# Supplementary material
Source: publisher figshare collection journal article supplement (https://acs.figshare.com/ndownloader/files/22819538)
Supplement: Supplementary file 1 [file 22819538]

## Supporting Information

# Stereodivergent Access to Enantioenriched Epoxy Alcohols with Three Stereogenic Centers via Ruthenium-Catalyzed Transfer Hydrogenation

Zhifei Zhao,<sup>†</sup> Prasanta Ray Bagdi,<sup>†</sup> Shuang Yang,<sup>†,‡</sup> Jinggong Liu,<sup>§</sup> Weici Xu,<sup>\*,†</sup> and Xinqiang Fang<sup>\*,†,‡</sup>

<sup>†</sup>State Key Laboratory of Structural Chemistry, Fujian Institute of Research on the Structure of Matter, Center for Excellence in Molecular Synthesis, University of Chinese Academy of Sciences, Fuzhou 350100, China.

<sup>‡</sup>Key Laboratory of Synthetic Chemistry of Natural Substances, Shanghai Institute of Organic Chemistry, Shanghai 200032, China.

<sup>§</sup>Orthopedics Department, Guangdong Provincial Hospital of Traditional Chinese Medicine, NO. 111 Dade Road, Guangzhou 510120, China.

## Table of Contents

|             |                                                                     |     |
|-------------|---------------------------------------------------------------------|-----|
| <b>I</b>    | General Information                                                 | S1  |
| <b>II</b>   | X-ray crystallographic analysis                                     | S2  |
| <b>III</b>  | General procedures for the preparation of substrates                | S6  |
| <b>IV</b>   | Typical procedure for the transfer hydrogenation                    | S9  |
| <b>V</b>    | Procedures for the derivatizations of products                      | S9  |
| <b>VI</b>   | Characterizations of new compounds                                  | S11 |
| <b>VII</b>  | <sup>1</sup> H NMR and <sup>13</sup> C NMR spectra of new compounds | S30 |
| <b>VIII</b> | HPLC spectra for ee determination                                   | S78 |

### I. General Information

Commercially available materials purchased from Meryer, Aladdin, and Adamas were used as received; unless otherwise noted, all reactions and manipulations involving air- and moisture-sensitive compounds were performed using standard Schlenk techniques. Catalyst **C** was synthesized using the same procedures as shown in the literature (*J. Am. Chem. Soc.* **2011**, *133*, 14960–14963). All solvents were purified and dried using normal procedures. Proton nuclear magnetic resonance (<sup>1</sup>H NMR) spectra were recorded on a Bruker AVANCE III HD400 (400 MHz) spectrometer. Chemical shifts were recorded in parts per million (ppm,  $\delta$ ) relative to tetramethylsilane ( $\delta$  = 0.00 ppm) or chloroform ( $\delta$  = 7.26 ppm). <sup>1</sup>H NMR splitting

patterns are designated as singlet (s), doublet (d), triplet (t), quartet (q), dd (doublet of doublets), m (multiplet), and etc. All first-order splitting patterns were assigned on the basis of the appearance of the multiplet. Splitting patterns that could not be easily interpreted are designated as multiplet (m) or broad (br). Carbon nuclear magnetic resonance ( $^{13}\text{C}$  NMR) spectra were recorded on a Bruker AVANCE III HD400 (100 MHz) spectrometer. High resolution mass spectral analysis (HRMS) was performed on Thermo Fisher Scientific LTQ FT Ultra mass spectrometer. The determination of ee was performed via chiral HPLC analysis using Shimadzu LC-20AD HPLC workstation. X-ray crystallography analysis was performed on Agilent SuperNova X-ray diffractionmeter. Optical rotations were measured using a 1 mL cell with a 5 dm path length on an INESA SGW-1 polarimeter and are reported as follows:  $[\alpha]_{\text{D}}^{\text{rt}}$  (cin g per 100 mL solvent). Analytical thin-layer chromatography (TLC) was carried out on WFH-203 F254 pre-coated silica gel plate (0.2 mm thickness). Visualization was performed using a UV lamp or 2,4-dinitrophenylhydrazine or potassium permanganate stain.

## II. X-ray crystallographic analysis

### X-ray crystallographic analysis of 3i

Method for single crystal cultivation: a solid sample (10–20 mg) was dissolved in  $\text{CHCl}_3$  (100–200  $\mu\text{L}$ ) in a vial at room temperature, and MeOH (300–600  $\mu\text{L}$ ) was added into the above solution slowly while keeping the sample all dissolved. Then vial was sealed with a piece of parafilm and stayed quietly for several days to allow the slow evaporation of the solution until a single crystal was obtained.

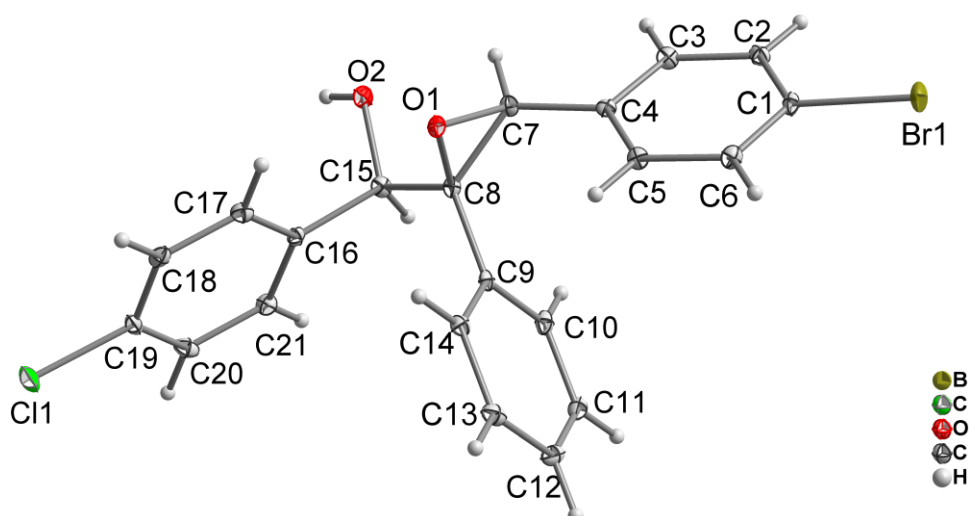

**Table S1. Crystal data and structure refinement for data of compound 3i:**

|                                              |                                                               |
|----------------------------------------------|---------------------------------------------------------------|
| Identification code                          | 3i                                                            |
| Empirical formula                            | C <sub>21</sub> H <sub>16</sub> BrClO <sub>2</sub>            |
| Formula weight                               | 415.70                                                        |
| Temperature/K                                | 100.(2)                                                       |
| Crystal system                               | monoclinic                                                    |
| Space group                                  | P2 <sub>1</sub>                                               |
| a/Å                                          | 8.3009(2)                                                     |
| b/Å                                          | 10.9773(3)                                                    |
| c/Å                                          | 9.7497(3)                                                     |
| α/°                                          | 90                                                            |
| β/°                                          | 91.1200(10)                                                   |
| γ/°                                          | 90                                                            |
| Volume/Å <sup>3</sup>                        | 888.24(4)                                                     |
| Z                                            | 2                                                             |
| ρ <sub>calc</sub> /g/cm <sup>3</sup>         | 1.554                                                         |
| μ/mm <sup>-1</sup>                           | 2.476                                                         |
| F(000)                                       | 420.0                                                         |
| Crystal size/mm <sup>3</sup>                 | 0.200 × 0.200 × 0.200                                         |
| Radiation                                    | ? (λ = 0.71073)                                               |
| 2Θ range for data collection/° 6.16 to 55.02 |                                                               |
| Index ranges                                 | -10 ≤ h ≤ 10, -14 ≤ k ≤ 14, -12 ≤ l ≤ 12                      |
| Reflections collected                        | 18512                                                         |
| Independent reflections                      | 3988 [R <sub>int</sub> = 0.0339, R <sub>sigma</sub> = 0.0392] |
| Data/restraints/parameters                   | 3988/1/228                                                    |
| Goodness-of-fit on F <sup>2</sup>            | 1.052                                                         |

Final R indexes [ $I \geq 2\sigma(I)$ ]  $R_1 = 0.0196$ ,  $wR_2 = 0.0473$

Final R indexes [all data]  $R_1 = 0.0201$ ,  $wR_2 = 0.0474$

Largest diff. peak/hole /  $e \text{ \AA}^{-3}$  0.48/-0.34

Flack parameter 0.046(3)

**X-ray crystallographic analysis of 3m derivative (CCDC 2002835):**

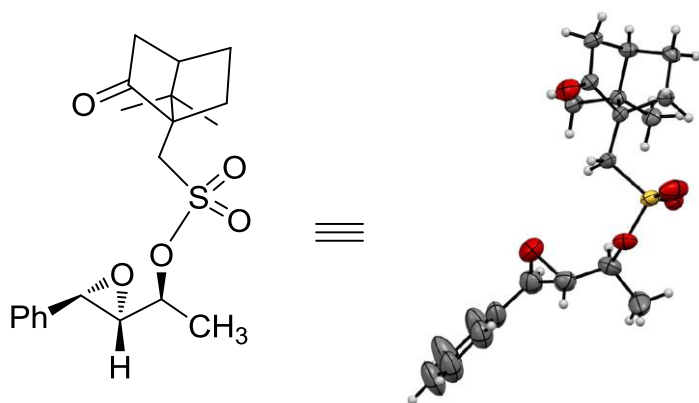

derivative of **3m**  
(95% ee after recrystallization)

**Table S2. Crystal data and structure refinement for data of 3m derivative:**

|                                               |                                      |
|-----------------------------------------------|--------------------------------------|
| Identification code                           | 3m derivative                        |
| Empirical formula                             | $C_{20}H_{26}NO_5S$                  |
| Formula weight                                | 380.48                               |
| Temperature/K                                 | 230(2)                               |
| Crystal system                                | monoclinic                           |
| Space group                                   | $P2_1$                               |
| $a/\text{\AA}$                                | 6.7030(5)                            |
| $b/\text{\AA}$                                | 8.4049(6)                            |
| $c/\text{\AA}$                                | 17.5344(14)                          |
| $\alpha/^\circ$                               | 90                                   |
| $\beta/^\circ$                                | 98.188(3)                            |
| $\gamma/^\circ$                               | 90                                   |
| Volume/ $\text{\AA}^3$                        | 977.78(13)                           |
| Z                                             | 2                                    |
| $\rho_{\text{calc}}/\text{g cm}^{-3}$         | 1.292                                |
| $\mu/\text{mm}^{-1}$                          | 0.193                                |
| $F(000)$                                      | 408.0                                |
| Crystal size/ $\text{mm}^3$                   | $0.1 \times 0.1 \times 0.1$          |
| Radiation                                     | MoK $\alpha$ ( $\lambda = 0.71073$ ) |
| $2\theta$ range for data collection/ $^\circ$ | 6.14 to 57.43                        |



|                                                |                                                               |
|------------------------------------------------|---------------------------------------------------------------|
| Index ranges                                   | $-9 \leq h \leq 9, -11 \leq k \leq 11, -23 \leq l \leq 23$    |
| Reflections collected                          | 27886                                                         |
| Independent reflections                        | 5054 [ $R_{\text{int}} = 0.0333, R_{\text{sigma}} = 0.0248$ ] |
| Data/restraints/parameters                     | 5054/1/238                                                    |
| Goodness-of-fit on $F^2$                       | 1.002                                                         |
| Final R indexes [ $I \geq 2\sigma(I)$ ]        | $R_1 = 0.0410, wR_2 = 0.1159$                                 |
| Final R indexes [all data]                     | $R_1 = 0.0466, wR_2 = 0.1218$                                 |
| Largest diff. peak/hole / $e \text{ \AA}^{-3}$ | 0.47/-0.20                                                    |
| Flack parameter                                | 0.05(2)                                                       |

**X-ray crystallographic analysis of 2n (CCDC 2002834):**

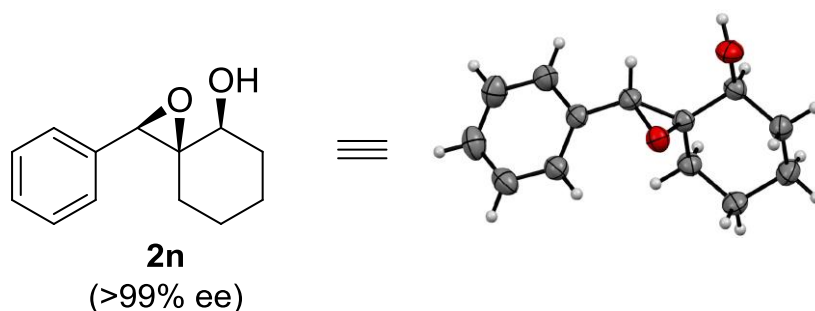

**Table S3. Crystal data and structure refinement for data of 2n**

|                                               |                                                          |
|-----------------------------------------------|----------------------------------------------------------|
| Identification code                           | 2n                                                       |
| Empirical formula                             | $C_{13}H_{16}O_2$                                        |
| Formula weight                                | 204.26                                                   |
| Temperature/K                                 | 293(2)                                                   |
| Crystal system                                | orthorhombic                                             |
| Space group                                   | $P2_12_12_1$                                             |
| $a/\text{\AA}$                                | 5.5579(2)                                                |
| $b/\text{\AA}$                                | 7.7831(2)                                                |
| $c/\text{\AA}$                                | 25.2947(7)                                               |
| $\alpha/^\circ$                               | 90                                                       |
| $\beta/^\circ$                                | 90                                                       |
| $\gamma/^\circ$                               | 90                                                       |
| Volume/ $\text{\AA}^3$                        | 1094.19(6)                                               |
| Z                                             | 4                                                        |
| $\rho_{\text{calc}}/\text{g cm}^{-3}$         | 1.240                                                    |
| $\mu/\text{mm}^{-1}$                          | 0.653                                                    |
| $F(000)$                                      | 440.0                                                    |
| Crystal size/ $\text{mm}^3$                   | $0.15 \times 0.1 \times 0.1$                             |
| Radiation                                     | $\text{CuK}\alpha$ ( $\lambda = 1.54184$ )               |
| $2\theta$ range for data collection/ $^\circ$ | 11.896 to 144.114                                        |
| Index ranges                                  | $-2 \leq h \leq 6, -9 \leq k \leq 8, -30 \leq l \leq 31$ |
| Reflections collected                         | 3096                                                     |

|                                                |                                                                  |
|------------------------------------------------|------------------------------------------------------------------|
| Independent reflections                        | 1887 [ $R_{\text{int}} = 0.0128$ , $R_{\text{sigma}} = 0.0176$ ] |
| Data/restraints/parameters                     | 1887/0/139                                                       |
| Goodness-of-fit on $F^2$                       | 1.072                                                            |
| Final R indexes [ $I > 2\sigma(I)$ ]           | $R_1 = 0.0312$ , $wR_2 = 0.0801$                                 |
| Final R indexes [all data]                     | $R_1 = 0.0322$ , $wR_2 = 0.0810$                                 |
| Largest diff. peak/hole / $e \text{ \AA}^{-3}$ | 0.18/-0.12                                                       |
| Flack parameter                                | -0.04(11)                                                        |

### III. General procedures for the preparation of substrates

#### 1. Typical procedure for the synthesis of substrates **1a–1h** and **1l** :

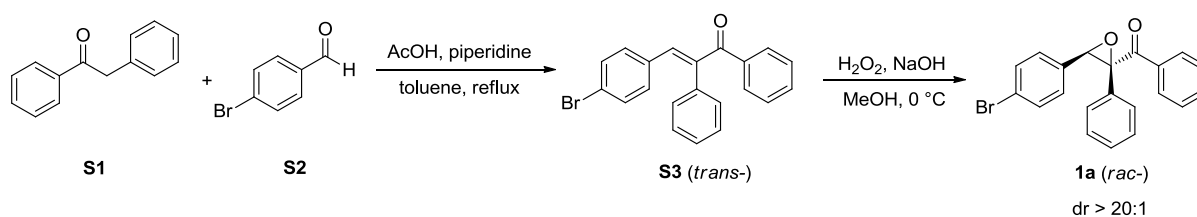

A solution of 1,2-diphenylethan-1-one **S1** (3.92 g, 20.0 mmol), 4-bromobenzaldehyde **S2** (3.68 g, 20.0 mmol), AcOH (1.0 mL) and piperidine (0.4 mL) in 50 mL toluene was refluxed overnight using a Dean-stark apparatus. After cooling to room temperature, the reaction was quenched by the addition of saturated aqueous  $\text{NaHCO}_3$  solution (10 mL). The aqueous layer was extracted with ethyl acetate (3 x 100 mL) and the combined organic layer was dried over anhydrous  $\text{Na}_2\text{SO}_4$ , filtered and concentrated under reduced pressure. The residue was purified by chromatography (petroleum ether/ethyl acetate, v:v = 50:1) to afford product **S3** (2.61 g, 36% yield).

A solution of **S3** (0.51 g, 1.41 mmol) in 30 mL MeOH was added  $\text{H}_2\text{O}_2$  (0.8 mL, 30% in water) dropwise at 0 °C. Then under this temperature, 0.8 mL aqueous NaOH solution (6 N) was slowly added into reaction mixture. The reaction suspension was monitored by TLC until no **S3** remained. Then the reaction was quenched with aqueous  $\text{Na}_2\text{S}_2\text{O}_3$  solution, and then extracted with ethyl acetate (3 x 30 mL). The combined organic layer was dried over anhydrous  $\text{Na}_2\text{SO}_4$ , filtered and evaporated under reduced pressure. The residue was purified by chromatography (petroleum ether/ethyl acetate, v:v = 30:1) to afford product **1a** (0.45 g, 84% yield).

#### 2. Typical procedure for the synthesis of substrate **1i** :

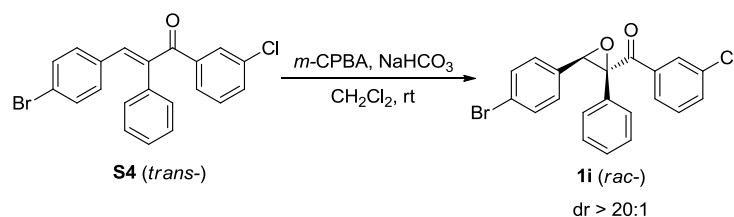

A solution of methyl **S4** (0.40 g, 1.0 mmol) and 3-chloroperoxybenzoic acid (0.52 g, 3.0 mmol) in 10 mL CH<sub>2</sub>Cl<sub>2</sub> were stirred for 2 h at room temperature. Then the reaction was quenched with aqueous Na<sub>2</sub>S<sub>2</sub>O<sub>3</sub> solution and extracted with ethyl acetate (3 x 20 mL). The combined organic layer was dried over anhydrous Na<sub>2</sub>SO<sub>4</sub>, filtered and evaporated under reduced pressure. The residue was purified by chromatography (petroleum ether/ethyl acetate, v:v = 50:1) to afford product **1i** (0.28 g, 68% yield).

### 3. Typical procedure for the synthesis of substrate **1k**:

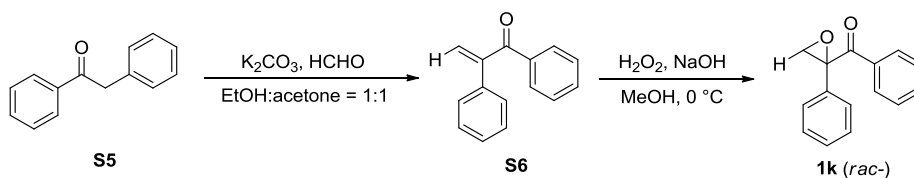

1,2-Diphenylethan-1-one **S5** (2.0 g, 10.0 mmol) and K<sub>2</sub>CO<sub>3</sub> (1.48 g, 10.7 mmol) were added in 50 mL EtOH:acetone (v:v = 1:1). Then formaldehyde (1.5 mL, 18.0 mmol) was added at room temperature. After 4 h, the aqueous layer was extracted with ethyl acetate (3 x 50 mL) and the combined organic layer was dried over anhydrous Na<sub>2</sub>SO<sub>4</sub>, filtered and concentrated under reduced pressure. The residue was purified by chromatography (petroleum ether/ethyl acetate, v:v = 50:1) to afford product **S6** (0.61 g, 29% yield).

A solution of **S6** (0.6 g, 2.9 mmol) in 30 mL MeOH was added H<sub>2</sub>O<sub>2</sub> (3.0 mL, 30% in water) dropwise at 0 °C. Then under this temperature, 3.0 mL aqueous NaOH solution (6 N) was slowly added into reaction mixture. The reaction suspension was monitored by TLC until no **S6** remained. Then the reaction was quenched with aqueous Na<sub>2</sub>S<sub>3</sub>O<sub>2</sub> solution, and then extracted with ethyl acetate (3 x 30 mL). The combined organic layer was dried over anhydrous Na<sub>2</sub>SO<sub>4</sub>, filtered and evaporated under reduced pressure. The residue was purified by chromatography (petroleum ether/ethyl acetate, v:v = 30:1) to afford product **1k** (0.48 g, 74% yield).

### 4. Typical procedure for the synthesis of substrate **1m**:

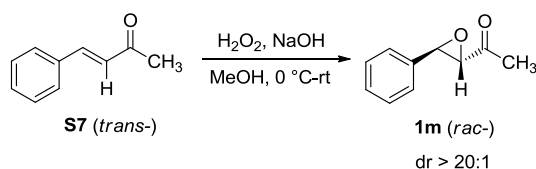

A solution of **S7** (1.88 g, 12.9 mmol) in 20 mL MeOH was added H<sub>2</sub>O<sub>2</sub> (4.0 mL, 30% in water) dropwisely at 0 °C. Then under this temperature, 3.8 mL aqueous NaOH solution (2 N) was slowly added into reaction mixture. The reaction suspension was slowly warmed to room temperature and monitored by TLC until no **S7** remained. Then the reaction was quenched with aqueous Na<sub>2</sub>S<sub>3</sub>O<sub>2</sub> solution, and then extracted with ethyl acetate (3 x 60 mL). The combined organic layer was dried over anhydrous Na<sub>2</sub>SO<sub>4</sub>, filtered and evaporated under reduced pressure. The residue was purified by chromatography (petroleum ether/ethyl acetate, v:v = 40:1) to afford product **1m** (1.42 g, 68% yield).

#### 5. Typical procedure for the synthesis of substrate **1n**:

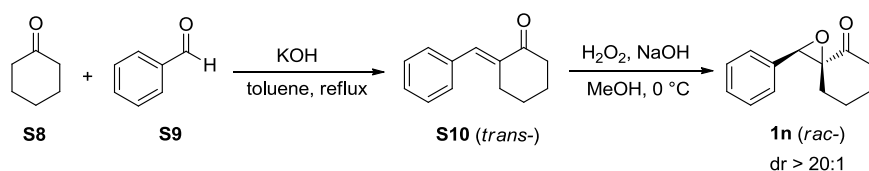

A solution of cyclohexanone **S8** (7.36 g, 75.0 mmol) and benzaldehyde **S9** (5.3 g, 50.0 mmol) in 50 mL aqueous KOH solution (1 N) was heated to reflux for 3 h. After cooling to room temperature, the aqueous layer was extracted with ethyl acetate (3 × 120 mL) and the combined organic layer was dried over anhydrous Na<sub>2</sub>SO<sub>4</sub>, filtered and concentrated under reduced pressure. The residue was purified by chromatography (petroleum ether/ethyl acetate, v:v = 30:1) to afford product **S10** (5.58 g, 60% yield).

A solution of **S10** (2.49 g, 13.4 mmol) in 35 mL MeOH was added H<sub>2</sub>O<sub>2</sub> (5.0 mL, 30% in water) dropwisely at room temperature. Then under this temperature, 2.5 mL aqueous NaOH solution (6 N) was slowly added into reaction mixture. The reaction suspension was monitored by TLC until no **S10** remained. Then the reaction was quenched with aqueous Na<sub>2</sub>S<sub>3</sub>O<sub>2</sub> solution, and then extracted with ethyl acetate (3 x 100 mL). The combined organic layer was dried over anhydrous Na<sub>2</sub>SO<sub>4</sub>, filtered and evaporated under reduced pressure. The residue was purified by chromatography (petroleum ether/ethyl acetate, v:v = 50:1) to afford product **1n** (1.30 g, 48% yield).

#### 6. Typical procedure for the synthesis of substrate **1o**:

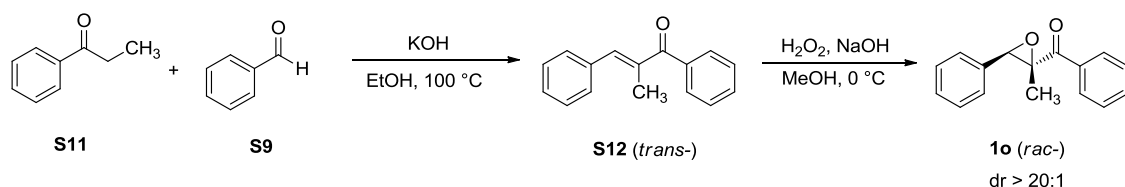

A solution of propiophenone **S11** (4.02 g, 30.0 mmol), benzaldehyde **S9** (6.36 g, 60.0 mmol), 60 mL aqueous KOH solution (0.1 N) and EtOH (60 mL) was stirred at room temperature for 3 d. After cooling to room temperature, the aqueous layer was extracted with ethyl acetate (3 x 150 mL) and the combined organic layer was dried over anhydrous Na<sub>2</sub>SO<sub>4</sub>, filtered and concentrated under reduced pressure. The residue was purified by chromatography (petroleum ether/ethyl acetate, v:v = 30:1) to afford product **S12** (4.19 g, 63% yield).

A solution of **S12** (3.00 g, 13.5 mmol) in 60 mL MeOH was added H<sub>2</sub>O<sub>2</sub> (6.0 mL, 30% in water) dropwisely at room temperature. Then under this temperature, 3.0 mL aqueous NaOH solution (6 N) was slowly added into reaction mixture. The reaction suspension was monitored by TLC until no **S12** remained. Then the reaction was quenched with aqueous Na<sub>2</sub>S<sub>3</sub>O<sub>2</sub> solution, and then extracted with ethyl acetate (3 x 100 mL). The combined organic layer was dried over anhydrous Na<sub>2</sub>SO<sub>4</sub>, filtered and evaporated under reduced pressure. The residue was purified by chromatography (petroleum ether/ethyl acetate, v:v = 50:1) to afford product **1o** (1.90 g, 59% yield).

#### IV. Typical procedure for the transfer hydrogenation:

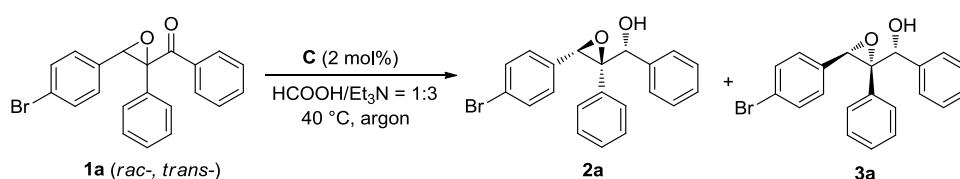

A mixture of epoxy ketone **1a** (75.6 mg, 0.2 mmol) and the Ru catalyst (2.5 mg, 2 mol%) in 1.0 mL formic acid/triethylamine (v:v = 1:3) mixture was stirred at 40 °C under argon atmosphere. After completion of the reaction as indicated by TLC, it was extracted with ethyl acetate (3 x 10 mL) and the organic extract was dried over anhydrous Na<sub>2</sub>SO<sub>4</sub> followed by the removal of solvent in a rotary evaporator. The residue was purified by chromatography (petroleum ether/ethyl acetate, v:v = 20:1) to afford product **2a** (35.1 mg, 46% yield) and **3a** (34.2 mg, 45% yield).

#### V. Procedures for derivatizations of products

### 1. Synthesis of compound 4a:

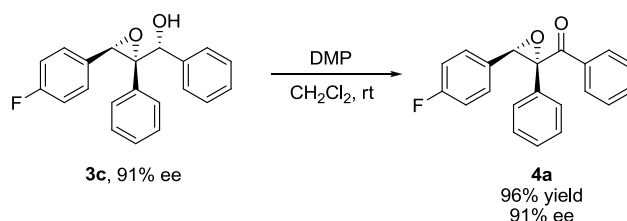

A solution of **3c** (17.0 mg, 0.05 mmol) and Dess-Martin periodine (61.0 mg, 0.09 mmol) in 5.0 mL dry  $\text{CH}_2\text{Cl}_2$  was stirred at room temperature under argon atmosphere. The reaction suspension was monitored by TLC until no **3c** remained. Then the reaction mixture was extracted with ethyl acetate (3 x 10 mL). The combined organic layer was dried over anhydrous  $\text{Na}_2\text{SO}_4$ , filtered and evaporated under reduced pressure. The residue was purified by chromatography (petroleum ether/ethyl acetate, v:v = 5:1) to afford product **4a** (15.3 mg, 96% yield).

### 2. Synthesis of compound 4b:

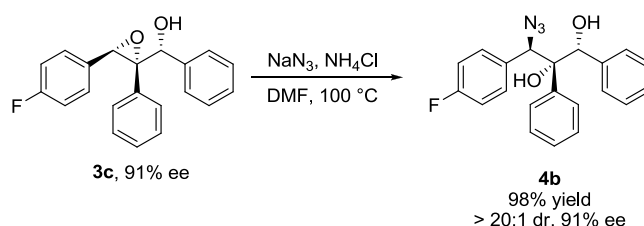

To a round-bottomed flask equipped with a dropping funnel, a condenser, and a magnetic stirrer was added **3c** (10.0 mg, 0.03 mmol),  $\text{NaN}_3$  (4.0 mg, 0.06 mmol),  $\text{NH}_4\text{Cl}$  (3.3 mg, 0.06 mmol) and 0.4 mL DMF. The reaction mixture was heated to  $100^\circ\text{C}$  and stirred continuously for 8 h in an over-dried pressure-tight reaction tube. Then the mixture was extracted with  $\text{CH}_2\text{Cl}_2$  (3 x 10 mL). The combined organic layer was dried over anhydrous  $\text{Na}_2\text{SO}_4$ , filtered and evaporated under reduced pressure. The residue was purified by chromatography (petroleum ether/ethyl acetate, v:v = 10:1) to afford product **4b** (10.7 mg, 98% yield).

### 3. Synthesis of compound 4c:

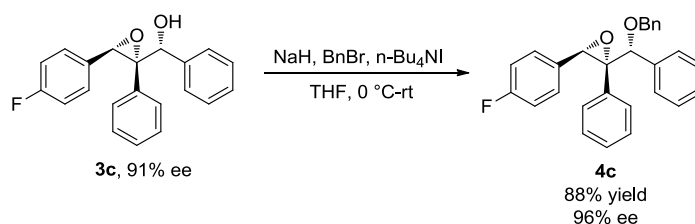

To a round-bottomed flask equipped with a dropping funnel, a condenser, and a magnetic stirrer was added **3c** (17.0 mg, 0.05 mmol), NaH (4.0 mg, 0.13 mmol) and 5.0 mL THF at 0 °C under argon atmosphere. After stirring for 40 min, BnBr (25.9 mg, 0.15 mmol) and n-Bu<sub>4</sub>NI (9.2 mg, 0.005 mmol) were added into the reaction mixture at 0 °C. The reaction resulting solution was slowly warm to room temperature and then stirred for additional 3 h. Then the reaction was quenched with aqueous saturated NH<sub>4</sub>Cl solution, and then extracted with ethyl acetate (3 x 10 mL). The combined organic layer was dried over anhydrous Na<sub>2</sub>SO<sub>4</sub>, filtered and evaporated under reduced pressure. The residue was purified by chromatography (petroleum ether/ethyl acetate, v:v = 20:1) to afford product **4c** (18.0 mg, 88% yield).

## VI. Characterizations of new compounds

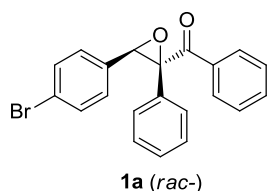

**(3-(4-bromophenyl)-2-phenyloxiran-2-yl)(phenyl)methanone (1a):** White solid, mp 149–150 °C, 0.45 g, 84% yield. <sup>1</sup>H NMR (600 MHz, CDCl<sub>3</sub>) δ 8.14–8.11 (m, 2H), 7.57–7.53 (m, 1H), 7.46–7.43 (m, 4H), 7.32–7.28 (m, 2H), 7.23–7.16 (m, 3H), 7.08–7.05 (m, 2H), 4.47 (s, 1H); <sup>13</sup>C NMR (150 MHz, CDCl<sub>3</sub>) δ 195.0, 133.99, 133.95, 132.5, 131.7, 131.2, 130.0, 128.7, 128.6, 128.5, 128.4, 127.5, 122.3, 71.3, 62.6; HRMS (ESI, m/z): calcd. for C<sub>21</sub>H<sub>15</sub>O<sub>2</sub>BrH<sup>+</sup> 379.0328, found 379.0322; IR (KBr thin film, cm<sup>-1</sup>): ν 3007, 2989, 1689, 1592, 1448, 1260, 1183, 1007, 1010, 780, 760, 641.

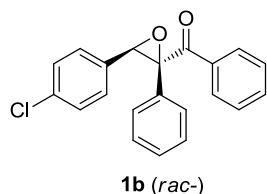

**(3-(4-chlorophenyl)-2-phenyloxiran-2-yl)(phenyl)methanone (1b):** White solid, mp 100–101 °C, 0.28 g, 60% yield. <sup>1</sup>H NMR (400 MHz, CDCl<sub>3</sub>) δ 8.10–8.07 (m, 2H), 7.52–7.47 (m, 1H), 7.41–7.37 (m, 4H), 7.20–7.05 (m, 7H), 4.44 (s, 1H); <sup>13</sup>C NMR (100 MHz, CDCl<sub>3</sub>) δ 194.9, 134.0, 133.9, 132.0, 131.7, 129.9, 128.6, 128.5, 128.3, 128.2, 128.1, 127.5, 71.3, 62.5;

HRMS (ESI,  $m/z$ ): calcd. for  $C_{21}H_{15}O_2ClH^+$  335.0833, found 335.0837; IR (KBr thin film,  $cm^{-1}$ ):  $\nu$  3060, 1689, 1609, 1578, 1501, 1495, 1181, 1087, 1013, 817, 746, 698.

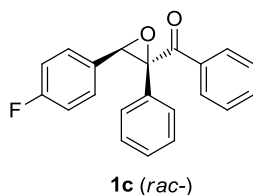

**(3-(4-fluorophenyl)-2-phenyloxiran-2-yl)(phenyl)methanone (1c):** White solid, mp 93–94 °C, 0.34 g, 76% yield.  $^1H$  NMR (600 MHz,  $CDCl_3$ )  $\delta$  8.15–8.12 (m, 2H), 7.57–7.53 (m, 1H), 7.46–7.43 (m, 4H), 7.23–7.14 (m, 5H), 6.88–6.84 (m, 2H), 4.50 (s, 1H);  $^{13}C$  NMR (150 MHz,  $CDCl_3$ )  $\delta$  195.2, 162.6 (d,  $J = 245.4$  Hz), 134.1, 133.9, 131.8, 130.0, 129.2 (d,  $J = 2.5$  Hz), 128.7, 128.54, 128.48, 128.3, 127.6, 115.1 (d,  $J = 21.7$  Hz), 71.3, 62.6; HRMS (ESI,  $m/z$ ): calcd. for  $C_{21}H_{15}O_2FH^+$  319.1129, found 319.1131; IR (KBr thin film,  $cm^{-1}$ ):  $\nu$  3037, 1687, 1601, 1582, 1510, 1446, 1275, 1187, 1031, 838, 775, 698.

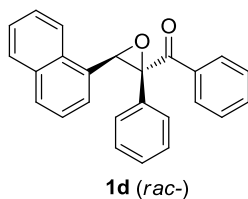

**(3-(naphthalen-1-yl)-2-phenyloxiran-2-yl)(phenyl)methanone (1d):** Yellow solid, mp 109–110 °C, 0.25 g, 51% yield.  $^1H$  NMR (600 MHz,  $CDCl_3$ )  $\delta$  8.38–8.36 (m, 1H), 8.20–8.16 (m, 2H), 7.75 (d,  $J = 8.2$  Hz, 1H), 7.65 (d,  $J = 8.2$  Hz, 1H), 7.61–7.54 (m, 2H), 7.50–7.41 (m, 6H), 7.34–7.30 (m, 1H), 7.05–6.98 (m, 3H), 5.05 (s, 1H);  $^{13}C$  NMR (150 MHz,  $CDCl_3$ )  $\delta$  195.4, 134.1, 134.0, 133.0, 132.1, 130.9, 130.2, 129.3, 128.7, 128.5, 128.3, 128.2, 128.0, 126.7, 126.5, 126.0, 124.9, 124.6, 123.6, 70.7, 63.2; HRMS (ESI,  $m/z$ ): calcd. for  $C_{25}H_{18}O_2H^+$  351.1380, found 351.1381; IR (KBr thin film,  $cm^{-1}$ ):  $\nu$  2983, 1681, 1599, 1517, 1457, 1392, 1275, 1266, 1181, 1019, 855, 698.

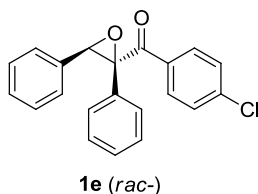

**(4-chlorophenyl)(2,3-diphenyloxiran-2-yl)methanone (1e):** White solid, mp 114–115 °C, 0.38 g, 80% yield.  $^1H$  NMR (600 MHz,  $CDCl_3$ )  $\delta$  8.10–8.07 (m, 2H), 7.42–7.40 (m, 4H), 7.21–7.15 (m, 8H), 4.51 (s, 1H);  $^{13}C$  NMR (150 MHz,  $CDCl_3$ )  $\delta$  194.2, 140.4, 133.2, 132.5,



131.7, 131.4, 129.0, 128.5, 128.3, 128.2, 128.0, 127.5, 126.8, 71.2, 63.2; HRMS (ESI,  $m/z$ ): calcd. for  $C_{21}H_{15}ClO_2H^+$  335.0833, found 335.0834; IR (KBr thin film,  $cm^{-1}$ ):  $\nu$  3063, 3001, 1683, 1583, 1450, 1280, 1178, 1019, 845, 766, 752, 701.

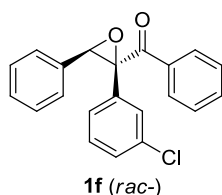

**(3-chlorophenyl)(2,3-diphenyloxiran-2-yl)methanone (1f):** Yellow solid, mp 68–69 °C, 0.33 g, 70% yield.  $^1H$  NMR (600 MHz,  $CDCl_3$ )  $\delta$  8.14–8.11 (m, 2H), 7.59–7.55 (m, 1H), 7.48–7.45 (m, 3H), 7.34–7.32 (m, 1H), 7.22–7.17 (m, 5H), 7.14–7.10 (m, 2H), 4.52 (s, 1H);  $^{13}C$  NMR (150 MHz,  $CDCl_3$ )  $\delta$  194.8, 134.22, 134.18, 134.1, 133.9, 132.9, 130.0, 129.5, 128.73, 128.65, 128.3, 128.1, 127.7, 126.7, 125.8, 70.7, 63.3; HRMS (ESI,  $m/z$ ): calcd. for  $C_{21}H_{15}O_2H^+$  335.0833, found 335.0835; IR (KBr thin film,  $cm^{-1}$ ):  $\nu$  3074, 1680, 1598, 1478, 1283, 1178, 1084, 1022, 857, 769, 755, 695.

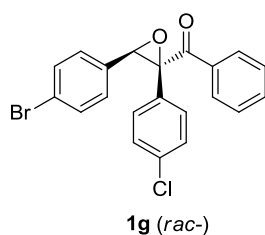

**(3-(4-bromophenyl)-2-(4-chlorophenyl)oxiran-2-yl)(phenyl)methanone (1g):** White solid, mp 91–92 °C, 0.30 g, 51% yield.  $^1H$  NMR (600 MHz,  $CDCl_3$ )  $\delta$  8.11–8.08 (m, 2H), 7.58–7.55 (m, 1H), 7.47–7.43 (m, 2H), 7.39–7.36 (m, 2H), 7.34–7.31 (m, 2H), 7.20–7.17 (m, 2H), 7.06–7.02 (m, 2H), 4.46 (s, 1H);  $^{13}C$  NMR (150 MHz,  $CDCl_3$ )  $\delta$  194.7, 134.7, 134.1, 133.8, 132.1, 131.4, 130.3, 129.9, 128.9, 128.73, 128.71, 128.3, 122.5, 70.8, 62.7; HRMS (ESI,  $m/z$ ): calcd. for  $C_{21}H_{14}O_2ClBrH^+$  412.9938, found 412.9942; IR (KBr thin film,  $cm^{-1}$ ):  $\nu$  2938, 1677, 1604, 1498, 1450, 1319, 1280, 1175, 1019, 772, 749, 695.

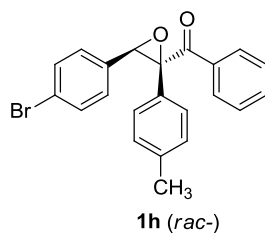

**(3-(4-bromophenyl)-2-(p-tolyl)oxiran-2-yl)(phenyl)methanone (1h):** Colourless liquid, 0.49 g, 89% yield.  $^1H$  NMR (600 MHz,  $CDCl_3$ )  $\delta$  8.15–8.12 (m, 2H), 7.55–7.51 (m, 1H),

7.45–7.41 (m, 2H), 7.35–7.30 (m, 4H), 7.10–7.07 (m, 2H), 7.03–7.01 (m, 2H), 4.47 (s, 1H), 2.22 (s, 3H);  $^{13}\text{C}$  NMR (150 MHz,  $\text{CDCl}_3$ )  $\delta$  195.1, 138.4, 134.1, 133.9, 132.7, 131.2, 130.0, 129.2, 128.64, 128.60, 128.5, 127.4, 122.2, 71.4, 62.6, 21.3; HRMS (ESI,  $m/z$ ): calcd. for  $\text{C}_{22}\text{H}_{17}\text{O}_2\text{BrH}^+$  393.0485, found 393.0488; IR (KBr thin film,  $\text{cm}^{-1}$ ):  $\nu$  2989, 1686, 1601, 1541, 1493, 1444, 1277, 1186, 1076, 888, 772, 698.

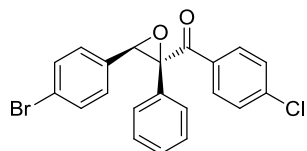

**1i** (*rac*-)

**(3-(4-bromophenyl)-2-phenyloxiran-2-yl)(4-chlorophenyl)methanone (1i):** White solid, mp 154–155 °C, 0.28 g, 68% yield.  $^1\text{H}$  NMR (600 MHz,  $\text{CDCl}_3$ )  $\delta$  8.08–8.05 (m, 2H), 7.42–7.40 (m, 4H), 7.31–7.28 (m, 2H), 7.24–7.17 (m, 3H), 7.06–7.03 (m, 2H), 4.46 (s, 1H);  $^{13}\text{C}$  NMR (150 MHz,  $\text{CDCl}_3$ )  $\delta$  189.9, 136.6, 128.3, 127.4, 127.3, 125.1, 124.8, 124.53, 124.47, 123.5, 118.4, 67.3, 58.7; HRMS (ESI,  $m/z$ ): calcd. for  $\text{C}_{21}\text{H}_{14}\text{O}_2\text{ClBrH}^+$  412.9938, found 412.9941; IR (KBr thin film,  $\text{cm}^{-1}$ ):  $\nu$  3011, 2989, 1691, 1592, 1487, 1277, 1175, 1101, 1007, 766, 749, 695.

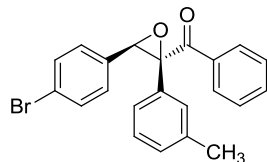

**1j** (*rac*-)

**(3-(4-bromophenyl)-2-(*m*-tolyl)oxiran-2-yl)(phenyl)methanone (1j):** Yellow solid, mp 77–78 °C, 0.41 g, 74% yield.  $^1\text{H}$  NMR (600 MHz,  $\text{CDCl}_3$ )  $\delta$  8.13–8.10 (m, 2H), 7.55–7.52 (m, 1H), 7.45–7.42 (m, 2H), 7.32–7.30 (m, 4H), 7.08–7.06 (m, 2H), 7.02–7.00 (m, 2H), 4.44 (s, 1H), 2.22 (s, 3H);  $^{13}\text{C}$  NMR (150 MHz,  $\text{CDCl}_3$ )  $\delta$  195.0, 138.1, 134.0, 133.9, 132.6, 131.5, 131.1, 130.0, 129.4, 128.7, 128.5, 128.3, 128.0, 124.5, 122.2, 71.4, 62.7, 21.5; HRMS (ESI,  $m/z$ ): calcd. for  $\text{C}_{22}\text{H}_{17}\text{O}_2\text{BrH}^+$  393.0486, found 393.0488; IR (KBr thin film,  $\text{cm}^{-1}$ ):  $\nu$  2955, 2856, 1683, 1541, 1450, 1374, 1269, 1175, 1022, 894, 763, 761, 707.

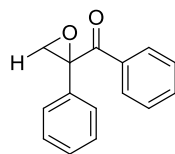

**1k** (*rac*-)

**phenyl(2-phenyloxiran-2-yl)methanone (1k):** Yellow solid, mp 68–69 °C, 0.48 g, 74% yield.  $^1\text{H}$  NMR (600 MHz,  $\text{CDCl}_3$ )  $\delta$  8.04–8.02 (m, 2H), 7.54–7.50 (m, 1H), 7.47–7.43 (m, 2H), 7.42–7.29 (m, 5H), 3.39 (d,  $J = 5.3$  Hz, 1H), 3.07 (d,  $J = 5.3$  Hz, 1H);  $^{13}\text{C}$  NMR (150 MHz,  $\text{CDCl}_3$ )  $\delta$  194.8, 135.7, 134.4, 133.9, 130.1, 128.9, 128.7, 128.6, 125.5, 63.3, 55.2; HRMS (ESI,  $m/z$ ): calcd. for  $\text{C}_{15}\text{H}_{12}\text{O}_2\text{H}^+$  225.0910, found 225.0909; IR (KBr thin film,  $\text{cm}^{-1}$ ):  $\nu$  2986, 1683, 1606, 1581, 1487, 1453, 1277, 1172, 1010, 854, 769, 704.

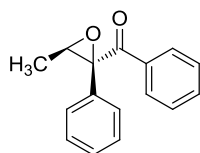

**1k** (*rac*-)

**(3-methyl-2-phenyloxiran-2-yl)(phenyl)methanone (1l):** Colourless liquid, 0.24 g, 71% yield.  $^1\text{H}$  NMR (600 MHz,  $\text{CDCl}_3$ )  $\delta$  8.05–8.02 (m, 2H), 7.57–7.55 (m, 2H), 7.51–7.47 (m, 1H), 7.40–7.35 (m, 4H), 7.32–7.29 (m, 1H), 3.58 (q,  $J = 5.4$  Hz, 1H), 1.14 (d,  $J = 5.4$  Hz, 3H);  $^{13}\text{C}$  NMR (150 MHz,  $\text{CDCl}_3$ )  $\delta$  195.7, 134.3, 133.7, 133.3, 130.0, 128.6, 128.5, 128.4, 126.9, 68.7, 59.3, 13.5; HRMS (ESI,  $m/z$ ): calcd. for  $\text{C}_{16}\text{H}_{14}\text{O}_2\text{H}^+$  239.1067, found 239.1068; IR (KBr thin film,  $\text{cm}^{-1}$ ):  $\nu$  2932, 1729, 1680, 1584, 1502, 1380, 1277, 1260, 1184, 1056, 851, 701.

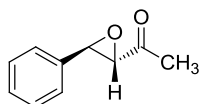

**1l** (*rac*-)

**1-(3-phenyloxiran-2-yl)ethan-1-one (1m):** White solid, mp 38–39 °C, 1.42 g, 68% yield.  $^1\text{H}$  NMR (600 MHz,  $\text{CDCl}_3$ )  $\delta$  7.37–7.32 (m, 3H), 7.27–7.24 (m, 2H), 3.99 (d,  $J = 1.8$  Hz, 1H), 3.48–3.47 (m, 1H), 2.17 (s, 3H);  $^{13}\text{C}$  NMR (150 MHz,  $\text{CDCl}_3$ )  $\delta$  204.3, 135.1, 129.1, 128.8, 125.8, 63.6, 57.9, 24.9; HRMS (ESI,  $m/z$ ): calcd. for  $\text{C}_{10}\text{H}_{10}\text{O}_2\text{H}^+$  163.0754, found 163.0753; IR (KBr thin film,  $\text{cm}^{-1}$ ):  $\nu$  2997, 1721, 1489, 1460, 1366, 1281, 1250, 1187, 1090, 886, 752, 698.

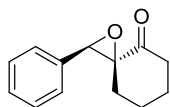

**1m** (*rac*-)

**2-phenyl-1-oxaspiro[2.5]octan-4-one (1n):** White solid, mp 110–111 °C, 1.30 g, 48% yield.  $^1\text{H}$  NMR (600 MHz,  $\text{CDCl}_3$ )  $\delta$  7.38–7.31 (m, 3H), 7.30–7.28 (m, 2H), 4.04 (s, 1H), 2.73–2.68 (m, 1H), 2.45–2.38 (m, 1H), 2.03–1.99 (m, 1H), 1.93 (td,  $J = 13.2, 4.2$  Hz, 1H), 1.82–1.73 (m,

2H), 1.63–1.58 (m, 1H), 1.47–1.39 (m, 1H);  $^{13}\text{C}$  NMR (150 MHz,  $\text{CDCl}_3$ )  $\delta$  206.7, 133.6, 128.4, 126.8, 126.7, 66.1, 64.2, 42.0, 27.5, 24.8, 23.5; HRMS (ESI,  $m/z$ ): calcd. for  $\text{C}_{13}\text{H}_{14}\text{O}_2\text{H}^+$  203.1067, found 203.1066; IR (KBr thin film,  $\text{cm}^{-1}$ ):  $\nu$  2861, 1713, 1647, 1457, 1423, 1321, 1278, 1156, 1065, 886, 758, 704.

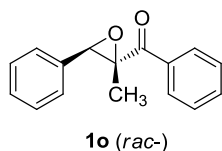

**(2-methyl-3-phenyloxiran-2-yl)(phenyl)methanone (1o):** Colourless liquid, 1.90 g, 59% yield.  $^1\text{H}$  NMR (600 MHz,  $\text{CDCl}_3$ )  $\delta$  8.06–8.04 (m, 2H), 7.61–7.57 (m, 1H), 7.51–7.47 (m, 2H), 7.43–7.34 (m, 5H), 4.16 (s, 1H), 1.43 (s, 3H);  $^{13}\text{C}$  NMR (150 MHz,  $\text{CDCl}_3$ )  $\delta$  198.3, 134.4, 133.9, 133.6, 129.4, 128.7, 128.5, 128.4, 126.7, 66.6, 61.7, 14.5; HRMS (ESI,  $m/z$ ): calcd. for  $\text{C}_{16}\text{H}_{14}\text{O}_2\text{H}^+$  239.1067, found 239.1069; IR (KBr thin film,  $\text{cm}^{-1}$ ):  $\nu$  3003, 2929, 1687, 1599, 1585, 1500, 1451, 1281, 1184, 977, 755, 698.

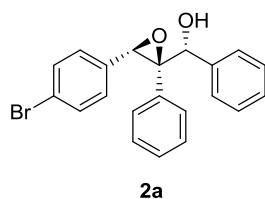

**(R)-((2R,3S)-3-(4-bromophenyl)-2-phenyloxiran-2-yl)(phenyl)methanol (2a):** Colourless liquid, 35.1 mg, 46% yield.  $^1\text{H}$  NMR (600 MHz,  $\text{CDCl}_3$ )  $\delta$  7.29–7.27 (m, 3H), 7.22–7.18 (m, 4H), 7.15–7.11 (m, 1H), 7.06–7.03 (m, 2H), 6.82–6.79 (m, 2H), 6.75–6.72 (m, 2H), 4.98 (s, 1H), 4.61 (s, 1H), 2.81 (d,  $J = 1.7$  Hz, 1H);  $^{13}\text{C}$  NMR (150 MHz,  $\text{CDCl}_3$ )  $\delta$  138.5, 133.9, 133.1, 130.9, 129.2, 128.5, 128.3, 128.0, 127.7, 127.6, 121.7, 76.3, 71.8, 60.0; HRMS (ESI,  $m/z$ ): calcd. for  $\text{C}_{21}\text{H}_{17}\text{O}_2\text{BrNa}^+$  403.0304, found 403.0308;  $[\alpha]_{\text{D}}^{25}$ : 15.9 (c 0.7,  $\text{CHCl}_3$ ); HPLC analysis: 90% *ee* (Chiralcel AD-H, 3:97  $i$ PrOH/Hexane, 1 mL/min, 254 nm),  $R_t$  (major) = 18.4 min,  $R_t$  (minor) = 24.8 min; IR (KBr thin film,  $\text{cm}^{-1}$ ):  $\nu$  3062, 3031, 2852, 1595, 1489, 1454, 1391, 1193, 1068, 1010, 757, 699.

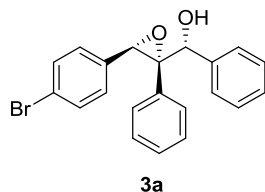

**(R)-((2S,3R)-3-(4-bromophenyl)-2-phenyloxiran-2-yl)(phenyl)methanol (3a):** White solid, mp 131–133 °C, 34.2 mg, 45% yield.  $^1\text{H}$  NMR (600 MHz,  $\text{CDCl}_3$ )  $\delta$  7.24–7.17 (m, 7H),

7.08–7.00 (m, 3H), 6.87–6.81 (m, 4H), 5.04 (d,  $J = 6.8$  Hz, 1H), 4.62 (s, 1H), 2.38 (d,  $J = 6.8$  Hz, 1H);  $^{13}\text{C}$  NMR (150 MHz,  $\text{CDCl}_3$ )  $\delta$  139.6, 134.1, 133.3, 130.9, 128.7, 128.4, 128.3, 128.2, 127.7, 127.6, 127.0, 121.6, 76.3, 71.7, 61.0; HRMS (ESI,  $m/z$ ): calcd. for  $\text{C}_{21}\text{H}_{17}\text{O}_2\text{BrNa}^+$  403.0304, found 403.0303;  $[\alpha]_{\text{D}}^{25}$ : +42.6 (c 0.8,  $\text{CHCl}_3$ ); HPLC analysis: 98% *ee* (Chiralcel AD-H, 3:97  $i$ PrOH/Hexane, 1 mL/min, 254 nm),  $R_t$  (major) = 39.2 min,  $R_t$  (minor) = 22.1 min; IR (KBr thin film,  $\text{cm}^{-1}$ ):  $\nu$  3065, 2928, 2849, 1599, 1492, 1448, 1397, 1189, 1065, 1008, 765, 695.

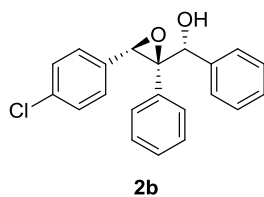

**(*R*)-((2*R*,3*S*)-3-(4-chlorophenyl)-2-phenyloxiran-2-yl)(phenyl)methanol (2b):** Colourless liquid, 29.0 mg, 43% yield.  $^1\text{H}$  NMR (400 MHz,  $\text{CDCl}_3$ )  $\delta$  7.31–7.27 (m, 3H), 7.23–7.19 (m, 2H), 7.16–7.11 (m, 1H), 7.08–7.03 (m, 4H), 6.90–6.86 (m, 2H), 6.77–6.74 (m, 2H), 4.99 (d,  $J = 0.9$  Hz, 1H), 4.63 (s, 1H), 2.86 (d,  $J = 1.7$  Hz, 1H);  $^{13}\text{C}$  NMR (150 MHz,  $\text{CDCl}_3$ )  $\delta$  138.6, 133.5, 133.4, 133.2, 129.2, 128.7, 128.5, 128.3, 128.02, 127.96, 127.6, 127.0, 76.3, 71.8, 60.0; HRMS (ESI,  $m/z$ ): calcd. for  $\text{C}_{21}\text{H}_{17}\text{O}_2\text{ClNa}^+$  359.0809, found 359.0811;  $[\alpha]_{\text{D}}^{25}$ : –7.6 (c 0.8,  $\text{CHCl}_3$ ); HPLC analysis: 90% *ee* (Chiralcel AD-H, 3:97  $i$ PrOH/Hexane, 1 mL/min, 220 nm),  $R_t$  (major) = 11.4 min,  $R_t$  (minor) = 14.7 min; IR (KBr thin film,  $\text{cm}^{-1}$ ):  $\nu$  3059, 2929, 2857, 1600, 1491, 1451, 1265, 1195, 1086, 1013, 766, 692.

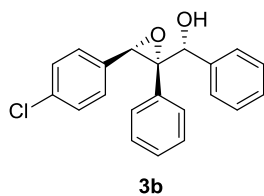

**(*R*)-((2*S*,3*R*)-3-(4-chlorophenyl)-2-phenyloxiran-2-yl)(phenyl)methanol (3b):** White solid, mp 128–130 °C, 26.9 mg, 40% yield.  $^1\text{H}$  NMR (600 MHz,  $\text{CDCl}_3$ )  $\delta$  7.26–7.19 (m, 5H), 7.07–7.01 (m, 5H), 6.93–6.90 (m, 2H), 6.86–6.83 (m, 2H), 5.04 (s, 1H), 4.64 (s, 1H), 2.55 (s, 1H);  $^{13}\text{C}$  NMR (150 MHz,  $\text{CDCl}_3$ )  $\delta$  139.7, 133.6, 133.41, 133.37, 128.7, 128.4, 128.2, 127.99, 127.96, 127.7, 127.6, 127.0, 76.4, 71.8, 60.9; HRMS (ESI,  $m/z$ ): calcd. for  $\text{C}_{21}\text{H}_{17}\text{O}_2\text{ClNa}^+$  359.0809, found 359.0810;  $[\alpha]_{\text{D}}^{25}$ : +26.5 (c 0.7,  $\text{CHCl}_3$ ); HPLC analysis: 91% *ee* (Chiralcel AD-H, 3:97  $i$ PrOH/Hexane, 1 mL/min, 220 nm),  $R_t$  (major) = 21.7 min,  $R_t$

(minor) = 12.8 min; IR (KBr thin film,  $\text{cm}^{-1}$ ):  $\nu$  3063, 2925, 2854, 1601, 1493, 1454, 1261, 1193, 1091, 1016, 763, 697.

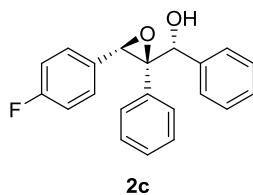

**(R)-((2R,3S)-3-(4-fluorophenyl)-2-phenyloxiran-2-yl)(phenyl)methanol (2c):** Colourless liquid, 28.5 mg, 44% yield.  $^1\text{H}$  NMR (600 MHz,  $\text{CDCl}_3$ )  $\delta$  7.30–7.27 (m, 3H), 7.22–7.19 (m, 2H), 7.15–7.11 (m, 1H), 7.06–7.03 (m, 2H), 6.92–6.89 (m, 2H), 6.79–6.74 (m, 4H), 4.99 (s, 1H), 4.65 (s, 1H), 2.97 (d,  $J = 9.5$  Hz, 1H);  $^{13}\text{C}$  NMR (150 MHz,  $\text{CDCl}_3$ )  $\delta$  162.3 (d,  $J = 245.6$  Hz), 138.7, 133.3, 130.6, 129.3, 128.5, 128.3, 128.0, 127.7, 127.6, 114.8 (d,  $J = 21.5$  Hz), 76.3 (t,  $J = 6.9$  Hz), 71.7, 60.1; HRMS (ESI,  $m/z$ ): calcd. for  $\text{C}_{21}\text{H}_{17}\text{O}_2\text{FNa}^+$  343.1105, found 343.1107;  $[\alpha]_{\text{D}}^{25}$ :  $-8.2$  (c 0.5,  $\text{CHCl}_3$ ); HPLC analysis: 89% *ee* (Chiralcel AD-H, 3:97 *i*PrOH/Hexane, 1 mL/min, 220 nm),  $R_t$  (major) = 14.4 min,  $R_t$  (minor) = 17.8 min; IR (KBr thin film,  $\text{cm}^{-1}$ ):  $\nu$  3055, 2925, 2869, 1605, 1497, 1452, 1268, 1199, 1085, 1007, 768, 687.

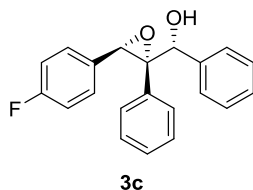

**(R)-((2S,3R)-3-(4-fluorophenyl)-2-phenyloxiran-2-yl)(phenyl)methanol (3c):** White solid, mp 85–87 °C, 28.8 mg, 45% yield.  $^1\text{H}$  NMR (400 MHz,  $\text{CDCl}_3$ )  $\delta$  7.28–7.20 (m, 5H), 7.07–7.00 (m, 3H), 6.97–6.93 (m, 2H), 6.86–6.84 (m, 2H), 6.79–6.75 (m, 2H), 5.05 (d,  $J = 6.3$  Hz, 1H), 4.65 (s, 1H), 2.43 (d,  $J = 6.7$  Hz, 1H);  $^{13}\text{C}$  NMR (100 MHz,  $\text{CDCl}_3$ )  $\delta$  162.4 (d,  $J = 244.5$  Hz), 139.9, 130.8 (d,  $J = 3.0$  Hz), 129.4, 128.9, 128.5, 128.4, 128.3 (d,  $J = 2.4$  Hz), 127.74, 127.66, 127.1, 114.9 (d,  $J = 21.6$  Hz), 76.6, 71.7, 61.1; HRMS (ESI,  $m/z$ ): calcd. for  $\text{C}_{21}\text{H}_{17}\text{O}_2\text{FNa}^+$  343.1105, found 343.1107;  $[\alpha]_{\text{D}}^{25}$ :  $+27.7$  (c 0.3,  $\text{CHCl}_3$ ); HPLC analysis: 91% *ee* (Chiralcel AD-H, 10:90 *i*PrOH/Hexane, 1 mL/min, 220 nm),  $R_t$  (major) = 10.1 min,  $R_t$  (minor) = 7.2 min; IR (KBr thin film,  $\text{cm}^{-1}$ ):  $\nu$  3057, 2929, 2861, 1602, 1499, 1456, 1269, 1194, 1088, 1011, 771, 684.

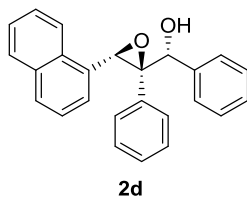

**(R)-((2R,3S)-3-(naphthalen-1-yl)-2-phenyloxiran-2-yl)(phenyl)methanol (2d):** Yellow liquid, 38.9 mg, 55% yield.  $^1\text{H}$  NMR (600 MHz,  $\text{CDCl}_3$ )  $\delta$  8.00 (d,  $J = 8.5$  Hz, 1H), 7.79–7.76 (m, 1H), 7.58 (d,  $J = 7.8$  Hz, 1H), 7.52–7.44 (m, 2H), 7.38–7.32 (m, 5H), 7.14 (t,  $J = 7.6$  Hz, 1H), 7.10–7.07 (m, 1H), 7.03–6.99 (m, 1H), 6.92 (t,  $J = 7.8$  Hz, 2H), 6.81–6.79 (m, 2H), 5.20 (d,  $J = 2.0$  Hz, 1H), 5.06 (s, 1H), 3.07 (d,  $J = 2.0$  Hz, 1H);  $^{13}\text{C}$  NMR (150 MHz,  $\text{CDCl}_3$ )  $\delta$  138.8, 133.8, 133.0, 130.9, 130.7, 128.8, 128.7, 128.5, 128.3, 127.8, 127.4, 126.2, 125.7, 125.2, 125.1, 124.0, 123.9, 122.8, 76.4, 71.9, 59.4; HRMS (ESI,  $m/z$ ): calcd. for  $\text{C}_{25}\text{H}_{20}\text{O}_2\text{Na}^+$  375.1356, found 375.1354;  $[\alpha]_{\text{D}}^{25}$ : 79.1 (c 1.9,  $\text{CHCl}_3$ ); HPLC analysis: 74% *ee* (Chiralcel AD-H, 10:90  $i$ PrOH/Hexane, 1 mL/min, 220 nm),  $R_t$  (major) = 8.5 min,  $R_t$  (minor) = 21.0 min; IR (KBr thin film,  $\text{cm}^{-1}$ ):  $\nu$  2986, 1571, 1457, 1332, 1278, 1258, 1224, 1071, 937, 852, 775, 667.

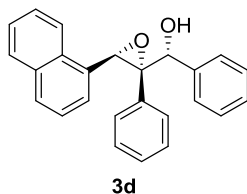

**(R)-((2S,3R)-3-(naphthalen-1-yl)-2-phenyloxiran-2-yl)(phenyl)methanol (3d):** White solid, mp 86–87 °C, 25.9 mg, 37% yield.  $^1\text{H}$  NMR (600 MHz,  $\text{CDCl}_3$ )  $\delta$  8.15–8.13 (m, 1H), 7.78–7.76 (m, 1H), 7.58–7.54 (m, 2H), 7.49–7.45 (m, 1H), 7.34–7.25 (m, 5H), 7.17–7.13 (m, 2H), 6.92–6.84 (m, 5H), 5.31 (d,  $J = 6.8$  Hz, 1H), 5.20 (s, 1H), 2.55 (d,  $J = 6.8$  Hz, 1H);  $^{13}\text{C}$  NMR (150 MHz,  $\text{CDCl}_3$ )  $\delta$  139.9, 134.1, 133.0, 130.9, 130.8, 128.8, 128.4, 128.3, 127.9, 127.6, 127.33, 127.26, 126.2, 125.7, 125.1, 123.9, 122.9, 76.2, 71.4, 60.1; HRMS (ESI,  $m/z$ ): calcd. for  $\text{C}_{25}\text{H}_{20}\text{O}_2\text{Na}^+$  375.1356, found 375.1357;  $[\alpha]_{\text{D}}^{25}$ : +158.1 (c 0.6,  $\text{CHCl}_3$ ); HPLC analysis: 65% *ee* (Chiralcel AD-H, 10:90  $i$ PrOH/Hexane, 1 mL/min, 220 nm),  $R_t$  (major) = 15.8 min,  $R_t$  (minor) = 10.0 min; IR (KBr thin film,  $\text{cm}^{-1}$ ):  $\nu$  3040, 1539, 1525, 1508, 1460, 1338, 1275, 1090, 900, 838, 775, 707.

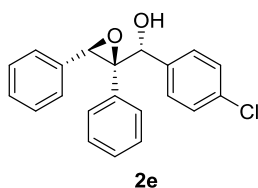

**(R)-(4-chlorophenyl)((2R,3S)-2,3-diphenyloxiran-2-yl)methanol (2e):** Colourless liquid, 28.3 mg, 42% yield.  $^1\text{H}$  NMR (600 MHz,  $\text{CDCl}_3$ )  $\delta$  7.26–7.24 (m, 2H), 7.15–7.03 (m, 8H), 6.91 (dd,  $J = 7.5, 1.5$  Hz, 2H), 6.76–6.74 (m, 2H), 4.97 (d,  $J = 1.4$  Hz, 1H), 4.62 (s, 1H), 2.91 (d,  $J = 1.7$  Hz, 1H);  $^{13}\text{C}$  NMR (150 MHz,  $\text{CDCl}_3$ )  $\delta$  137.3, 134.5, 134.1, 133.1, 129.3, 128.9, 128.5, 128.0, 127.8, 127.6, 126.7, 75.8, 71.5, 60.4; HRMS (ESI,  $m/z$ ): calcd. for  $\text{C}_{21}\text{H}_{17}\text{O}_2\text{ClNa}^+$  359.0809, found 359.0812;  $[\alpha]_{\text{D}}^{25}$ :  $-8.8$  (c 0.5,  $\text{CHCl}_3$ ); HPLC analysis: 83% *ee* (Chiralcel AD-H, 3:97  $i$ PrOH/Hexane, 1 mL/min, 254 nm),  $R_t$  (major) = 19.1 min,  $R_t$  (minor) = 25.3 min; IR (KBr thin film,  $\text{cm}^{-1}$ ):  $\nu$  3061, 2931, 2861, 1599, 1492, 1458, 1264, 1195, 1092, 1013, 765, 682.

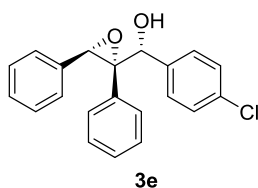

**(R)-(4-chlorophenyl)((2S,3R)-2,3-diphenyloxiran-2-yl)methanol (3e):** White semi-solid, 25.7 mg, 38% yield.  $^1\text{H}$  NMR (600 MHz,  $\text{CDCl}_3$ )  $\delta$  7.23–7.20 (m, 2H), 7.16–7.13 (m, 2H), 7.09–7.01 (m, 6H), 6.98–6.96 (m, 2H), 6.86–6.83 (m, 2H), 5.03 (d,  $J = 6.8$  Hz, 1H), 4.64 (s, 1H), 2.50 (d,  $J = 6.8$  Hz, 1H);  $^{13}\text{C}$  NMR (150 MHz,  $\text{CDCl}_3$ )  $\delta$  138.3, 134.6, 133.9, 133.3, 128.7, 128.5, 128.4, 127.8, 127.70, 127.66, 127.6, 126.6, 75.9, 71.4, 61.7; HRMS (ESI,  $m/z$ ): calcd. for  $\text{C}_{21}\text{H}_{17}\text{O}_2\text{ClNa}^+$  359.0809, found 359.0810;  $[\alpha]_{\text{D}}^{25}$ :  $+26.2$  (c 0.5,  $\text{CHCl}_3$ ); HPLC analysis: 98% *ee* (Chiralcel AD-H, 3:97  $i$ PrOH/Hexane, 1 mL/min, 254 nm),  $R_t$  (major) = 37.5 min,  $R_t$  (minor) = 21.5 min; IR (KBr thin film,  $\text{cm}^{-1}$ ):  $\nu$  3057, 2932, 2866, 1597, 1493, 1459, 1261, 1199, 1087, 1015, 759, 681.

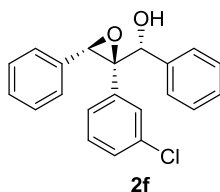

**(R)-(3-chlorophenyl)((2R,3S)-2,3-diphenyloxiran-2-yl)methanol (2f):** Colourless liquid, 29.1 mg, 43% yield.  $^1\text{H}$  NMR (400 MHz,  $\text{CDCl}_3$ )  $\delta$  7.32–7.30 (m, 3H), 7.26–7.21 (m, 2H), 7.13–7.07 (m, 4H), 6.97–6.88 (m, 4H), 6.49 (d,  $J = 7.6$  Hz, 1H), 4.96 (s, 1H), 4.68 (s, 1H), 2.87 (d,  $J = 6.2$  Hz, 1H);  $^{13}\text{C}$  NMR (100 MHz,  $\text{CDCl}_3$ )  $\delta$  138.3, 135.7, 134.2, 133.4, 129.2, 128.62, 128.59, 128.4, 128.0, 127.9, 127.8, 127.6, 127.4, 126.5, 76.2, 71.0, 60.6; HRMS (ESI,  $m/z$ ): calcd. for  $\text{C}_{21}\text{H}_{17}\text{O}_2\text{ClNa}^+$  359.0809, found 359.0811;  $[\alpha]_{\text{D}}^{25}$ :  $-19.4$  (c 2.1,  $\text{CHCl}_3$ ); HPLC analysis: 80% *ee* (Chiralcel AD-H, 1.5:98.5  $i$ PrOH/Hexane, 1 mL/min, 220



nm),  $R_t$  (major) = 25.3 min,  $R_t$  (minor) = 34.7 min; IR (KBr thin film,  $\text{cm}^{-1}$ ):  $\nu$  3058, 3027, 2869, 1598, 1501, 1451, 1267, 1199, 1095, 1005, 765, 689.

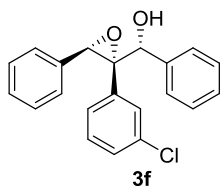

**(R)-(3-chlorophenyl)((2S,3R)-2,3-diphenyloxiran-2-yl)methanol (3f):** White semi-solid, 25.6 mg, 38% yield.  $^1\text{H}$  NMR (400 MHz,  $\text{CDCl}_3$ )  $\delta$  7.29–7.22 (m, 5H), 7.13–7.10 (m, 3H), 7.04–6.98 (m, 3H), 6.94–6.90 (m, 2H), 6.88 (d,  $J$  = 7.6 Hz, 1H), 5.04 (d,  $J$  = 6.5 Hz, 1H), 4.68 (s, 1H), 2.51 (d,  $J$  = 6.6 Hz, 1H);  $^{13}\text{C}$  NMR (100 MHz,  $\text{CDCl}_3$ )  $\delta$  139.3, 135.7, 134.3, 133.3, 128.9, 128.6, 128.4, 128.3, 127.84, 127.75, 127.7, 126.9, 126.8, 126.4, 76.4, 71.1, 61.7; HRMS (ESI,  $m/z$ ): calcd. for  $\text{C}_{21}\text{H}_{17}\text{O}_2\text{ClNa}^+$  359.0809, found 359.0808;  $[\alpha]_{\text{D}}^{25}$ : +19.0 (c 0.5,  $\text{CHCl}_3$ ); HPLC analysis: 90% *ee* (Chiralcel AD-H, 1.5:98.5  $i$ PrOH/Hexane, 1 mL/min, 220 nm),  $R_t$  (major) = 51.0 min,  $R_t$  (minor) = 38.5 min; IR (KBr thin film,  $\text{cm}^{-1}$ ):  $\nu$  3059, 2931, 2868, 1598, 1500, 1455, 1268, 1195, 1097, 1007, 766, 692.

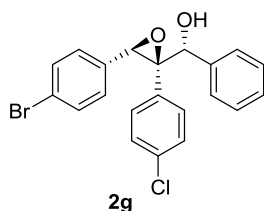

**(R)-((2R,3S)-3-(4-bromophenyl)-2-(4-chlorophenyl)oxiran-2-yl)(phenyl)methanol (2g):** Colourless liquid, 37.5 mg, 45% yield.  $^1\text{H}$  NMR (400 MHz,  $\text{CDCl}_3$ )  $\delta$  7.32–7.29 (m, 3H), 7.26–7.22 (m, 2H), 7.21–7.18 (m, 2H), 7.03 (d,  $J$  = 8.6 Hz, 2H), 6.83–6.80 (m, 2H), 6.69–6.66 (m, 2H), 4.94 (s, 1H), 4.63 (s, 1H), 2.74 (s, 1H);  $^{13}\text{C}$  NMR (100 MHz,  $\text{CDCl}_3$ )  $\delta$  138.1, 134.1, 134.0, 133.3, 131.1, 128.70, 128.65, 128.6, 128.4, 128.0, 127.9, 121.9, 75.8, 71.6, 61.1; HRMS (ESI,  $m/z$ ): calcd. for  $\text{C}_{21}\text{H}_{16}\text{O}_2\text{ClBrNa}^+$  436.9914, found 436.9916;  $[\alpha]_{\text{D}}^{25}$ : –6.1 (c 0.5,  $\text{CHCl}_3$ ); HPLC analysis: 87% *ee* (Chiralcel AD-H, 4:96  $i$ PrOH/Hexane, 1 mL/min, 254 nm),  $R_t$  (major) = 14.4 min,  $R_t$  (minor) = 23.0 min; IR (KBr thin film,  $\text{cm}^{-1}$ ):  $\nu$  3063, 2935, 2866, 1601, 1493, 1449, 1270, 1197, 1089, 1009, 759, 681.

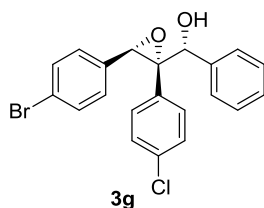

**(R)-((2S,3R)-3-(4-bromophenyl)-2-(4-chlorophenyl)oxiran-2-yl)(phenyl)methanol (3g):**

White solid, 123–126 °C, 24.9 mg, 30% yield.  $^1\text{H}$  NMR (400 MHz,  $\text{CDCl}_3$ )  $\delta$  7.29–7.19 (m, 7H), 7.10–7.01 (m, 3H), 6.88–6.84 (m, 3H), 5.05 (d,  $J$  = 6.6 Hz, 1H), 4.63 (s, 1H), 2.40 (d,  $J$  = 6.8 Hz, 1H);  $^{13}\text{C}$  NMR (100 MHz,  $\text{CDCl}_3$ )  $\delta$  139.6, 134.1, 133.3, 130.9, 128.6, 128.3, 128.22, 128.16, 127.64, 127.56, 127.0, 121.6, 76.3, 71.6, 60.9; HRMS (ESI,  $m/z$ ): calcd. for  $\text{C}_{21}\text{H}_{16}\text{O}_2\text{ClBrNa}^+$  436.9914, found 436.9915;  $[\alpha]_{\text{D}}^{25}$ : +28.3 (c 0.6,  $\text{CHCl}_3$ ); HPLC analysis: 93% *ee* (Chiralcel AD-H, 4:96  $i$ PrOH/Hexane, 1 mL/min, 254 nm),  $R_t$  (major) = 27.9 min,  $R_t$  (minor) = 17.6 min; IR (KBr thin film,  $\text{cm}^{-1}$ ):  $\nu$  3066, 2929, 2863, 1603, 1495, 1451, 1268, 1199, 1093, 1015, 761, 683.

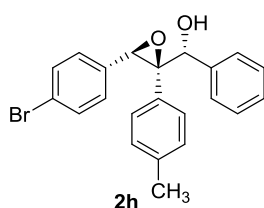

**(R)-((2R,3S)-3-(4-bromophenyl)-2-(p-tolyl)oxiran-2-yl)(phenyl)methanol (2h):**

Colourless liquid, 32.5 mg, 41% yield.  $^1\text{H}$  NMR (400 MHz,  $\text{CDCl}_3$ )  $\delta$  7.30–7.28 (m, 3H), 7.23–7.19 (m, 4H), 6.88–6.81 (m, 4H), 6.63 (d,  $J$  = 8.0 Hz, 2H), 4.97 (d,  $J$  = 1.1 Hz, 1H), 4.58 (s, 1H), 2.80 (d,  $J$  = 1.7 Hz, 1H), 2.23 (s, 3H);  $^{13}\text{C}$  NMR (100 MHz,  $\text{CDCl}_3$ )  $\delta$  138.6, 137.7, 134.0, 131.0, 130.9, 130.0, 129.0, 128.37, 128.35, 128.2, 127.6, 121.6, 76.3, 71.6, 59.9, 21.2; HRMS (ESI,  $m/z$ ): calcd. for  $\text{C}_{22}\text{H}_{19}\text{O}_2\text{BrNa}^+$  417.0461, found 417.0463;  $[\alpha]_{\text{D}}^{25}$ : –14.3 (c 0.5,  $\text{CHCl}_3$ ); HPLC analysis: 88% *ee* (Chiralcel AD-H, 3:97  $i$ PrOH/Hexane, 1 mL/min, 254 nm),  $R_t$  (major) = 19.1 min,  $R_t$  (minor) = 23.8 min; IR (KBr thin film,  $\text{cm}^{-1}$ ):  $\nu$  3061, 2936, 2865, 1599, 1497, 1459, 1264, 1201, 1097, 1011, 761, 688.

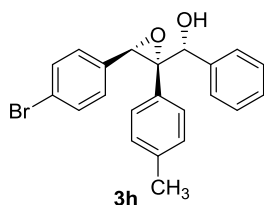

**(R)-((2S,3R)-3-(4-bromophenyl)-2-(p-tolyl)oxiran-2-yl)(phenyl)methanol (3h):**

White solid, mp 114–116 °C, 31.7 mg, 40% yield.  $^1\text{H}$  NMR (400 MHz,  $\text{CDCl}_3$ )  $\delta$  7.26–7.20 (m, 7H), 6.88–6.82 (m, 4H), 6.73 (d,  $J$  = 8.0 Hz, 2H), 5.02 (d,  $J$  = 6.7 Hz, 1H), 4.59 (s, 1H), 2.36 (d,  $J$  = 6.8 Hz, 1H), 2.19 (s, 3H);  $^{13}\text{C}$  NMR (100 MHz,  $\text{CDCl}_3$ )  $\delta$  139.7, 137.3, 134.2, 130.8, 130.1, 128.4, 128.29, 128.28, 128.25, 128.1, 127.0, 121.5, 76.4, 71.5, 60.9, 21.2; HRMS (ESI,  $m/z$ ): calcd. for  $\text{C}_{22}\text{H}_{19}\text{O}_2\text{BrNa}^+$  417.0461, found 417.0463;  $[\alpha]_{\text{D}}^{25}$ : +28.6 (c 0.9,  $\text{CHCl}_3$ ); HPLC

analysis: 97% *ee* (Chiralcel AD-H, 3:97 *i*PrOH/Hexane, 1 mL/min, 254 nm),  $R_t$  (major) = 32.6 min,  $R_t$  (minor) = 20.8 min; IR (KBr thin film,  $\text{cm}^{-1}$ ):  $\nu$  3060, 2938, 2862, 1601, 1499, 1463, 1261, 1200, 1095, 1013, 763, 671.

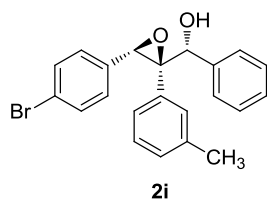

**(*R*)-((2*R*,3*S*)-3-(4-bromophenyl)-2-(*m*-tolyl)oxiran-2-yl)(phenyl)methanol (2i):** Colourless liquid, 30.7 mg, 39% yield.  $^1\text{H}$  NMR (400 MHz,  $\text{CDCl}_3$ )  $\delta$  7.29–7.20 (m, 7H), 6.96–6.88 (m, 2H), 6.82 (d,  $J$  = 7.5 Hz, 2H), 6.66 (s, 1H), 6.42 (d,  $J$  = 7.2 Hz, 1H), 4.98 (s, 1H), 4.57 (s, 1H), 2.79 (s, 1H), 2.15 (s, 3H);  $^{13}\text{C}$  NMR (100 MHz,  $\text{CDCl}_3$ )  $\delta$  138.5, 137.2, 133.9, 132.9, 130.8, 129.7, 128.7, 128.4, 128.3, 128.1, 127.6, 127.3, 126.2, 121.6, 76.2, 71.7, 59.9, 21.2; HRMS (ESI,  $m/z$ ): calcd. for  $\text{C}_{22}\text{H}_{19}\text{O}_2\text{BrNa}^+$  417.0461, found 417.0464;  $[\alpha]_{\text{D}}^{25}$ :  $-31.0$  (c 0.5,  $\text{CHCl}_3$ ); HPLC analysis: 92% *ee* (Chiralcel AD-H, 1:99 *i*PrOH/Hexane, 1 mL/min, 220 nm),  $R_t$  (major) = 41.7 min,  $R_t$  (minor) = 49.0 min; IR (KBr thin film,  $\text{cm}^{-1}$ ):  $\nu$  3059, 2931, 2861, 1600, 1496, 1460, 1263, 1201, 1098, 1009, 799, 705.

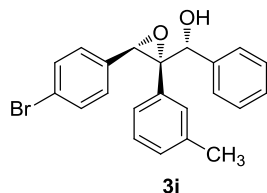

**(*R*)-((2*S*,3*R*)-3-(4-bromophenyl)-2-(*m*-tolyl)oxiran-2-yl)(phenyl)methanol (3i):** White solid, mp 110–112 °C, 29.9 mg, 38% yield.  $^1\text{H}$  NMR (400 MHz,  $\text{CDCl}_3$ )  $\delta$  7.27–7.20 (m, 7H), 6.93–6.85 (m, 4H), 6.69 (s, 1H), 6.61 (d,  $J$  = 6.7 Hz, 1H), 5.03 (d,  $J$  = 6.3 Hz, 1H), 4.58 (s, 1H), 2.40 (d,  $J$  = 6.6 Hz, 1H), 2.13 (s, 3H);  $^{13}\text{C}$  NMR (100 MHz,  $\text{CDCl}_3$ )  $\delta$  139.6, 137.1, 134.1, 133.1, 130.8, 129.2, 128.4, 128.24, 128.17, 128.1, 127.3, 126.9, 125.6, 121.5, 76.4, 71.6, 60.9, 21.2; HRMS (ESI,  $m/z$ ): calcd. for  $\text{C}_{22}\text{H}_{19}\text{O}_2\text{BrNa}^+$  417.0460, found 417.0463;  $[\alpha]_{\text{D}}^{25}$ :  $+35.9$  (c 0.6,  $\text{CHCl}_3$ ); HPLC analysis: 90% *ee* (Chiralcel AD-H, 3:97 *i*PrOH/Hexane, 1 mL/min, 220 nm),  $R_t$  (major) = 26.9 min,  $R_t$  (minor) = 18.0 min; IR (KBr thin film,  $\text{cm}^{-1}$ ):  $\nu$  3057, 2927, 2866, 1602, 1498, 1466, 1260, 1205, 1099, 1007, 793, 700.

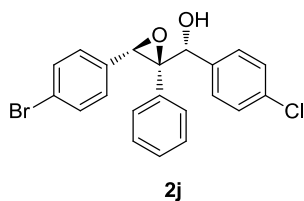

**(R)-((2R,3S)-3-(4-bromophenyl)-2-phenyloxiran-2-yl)(4-chlorophenyl)methanol (2j):**

Colourless liquid, 46.0 mg, 55% yield.  $^1\text{H}$  NMR (600 MHz,  $\text{CDCl}_3$ )  $\delta$  7.27–7.23 (m, 2H), 7.22–7.19 (m, 2H), 7.17–7.05 (m, 5H), 6.80–6.72 (m, 4H), 4.96 (d,  $J$  = 1.6 Hz, 1H), 4.55 (s, 1H), 2.82 (d,  $J$  = 1.9 Hz, 1H);  $^{13}\text{C}$  NMR (150 MHz,  $\text{CDCl}_3$ )  $\delta$  137.1, 134.2, 133.7, 132.7, 131.0, 129.2, 128.9, 128.5, 128.3, 128.2, 127.8, 121.9, 75.7, 71.6, 59.9; HRMS (ESI,  $m/z$ ): calcd. for  $\text{C}_{21}\text{H}_{16}\text{O}_2\text{ClBrNa}^+$  436.9914, found 436.9916;  $[\alpha]_{\text{D}}^{25}$ :  $-10.5$  (c 0.5,  $\text{CHCl}_3$ ); HPLC analysis: 54% *ee* (Chiralcel AD-H, 3:97  $i$ PrOH/Hexane, 1 mL/min, 254 nm),  $R_t$  (major) = 22.5 min,  $R_t$  (minor) = 27.2 min; IR (KBr thin film,  $\text{cm}^{-1}$ ):  $\nu$  3064, 2928, 2859, 1602, 1488, 1451, 1268, 1198, 1087, 1011, 767, 687.

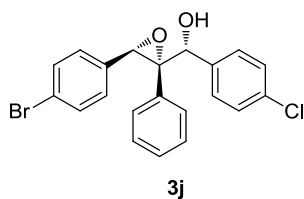

**(R)-((2S,3R)-3-(4-bromophenyl)-2-phenyloxiran-2-yl)(4-chlorophenyl)methanol (3j):**

White solid, mp 122–124 °C, 30.0 mg, 36% yield.  $^1\text{H}$  NMR (400 MHz,  $\text{CDCl}_3$ )  $\delta$  7.27–7.20 (m, 4H), 7.14 (d,  $J$  = 8.4 Hz, 2H), 7.10–7.03 (m, 3H), 6.88–6.84 (m, 4H), 5.04 (d,  $J$  = 6.8 Hz, 1H), 4.61 (s, 1H), 2.42 (d,  $J$  = 6.8 Hz, 1H);  $^{13}\text{C}$  NMR (100 MHz,  $\text{CDCl}_3$ )  $\delta$  138.1, 133.9, 133.8, 133.1, 130.9, 128.50, 128.45, 128.4, 128.2, 127.8, 127.7, 121.7, 75.6, 71.4, 60.9; HRMS (ESI,  $m/z$ ): calcd. for  $\text{C}_{21}\text{H}_{16}\text{O}_2\text{ClBrNa}^+$  436.9914, found 436.9918;  $[\alpha]_{\text{D}}^{25}$ :  $+36.4$  (c 0.6,  $\text{CHCl}_3$ ); HPLC analysis: 98% *ee* (Chiralcel AD-H, 3:97  $i$ PrOH/Hexane, 1 mL/min, 254 nm),  $R_t$  (major) = 41.8 min,  $R_t$  (minor) = 21.9 min; IR (KBr thin film,  $\text{cm}^{-1}$ ):  $\nu$  3061, 2926, 2857, 1601, 1489, 1455, 1263, 1197, 1086, 1009, 766, 689.

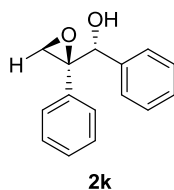

**(R)-phenyl((S)-2-phenyloxiran-2-yl)methanol (2k):** Colourless liquid, 19.9 mg, 44% yield.

$^1\text{H}$  NMR (600 MHz,  $\text{CDCl}_3$ )  $\delta$  7.28–7.21 (m, 6H), 7.19–7.16 (m, 2H), 7.14–7.11 (m, 2H),

5.04 (d,  $J = 0.9$  Hz, 1H), 3.39 (dd,  $J = 5.1, 0.5$  Hz, 1H), 2.94 (dd,  $J = 5.1, 0.5$  Hz, 1H), 2.74 (d, 1.7 Hz, 1H);  $^{13}\text{C}$  NMR (150 MHz,  $\text{CDCl}_3$ )  $\delta$  138.9, 136.8, 128.33, 128.27, 128.14, 128.08, 127.5, 74.5, 64.3, 50.3; HRMS (ESI,  $m/z$ ): calcd. for  $\text{C}_{15}\text{H}_{14}\text{O}_2\text{Na}^+$  249.0886, found 249.0888;  $[\alpha]_{\text{D}}^{25}$ : +71.5 (c 0.6,  $\text{CHCl}_3$ ); HPLC analysis: 85% *ee* (Chiralcel AD-H, 5:95  $i$ PrOH/Hexane, 1 mL/min, 220 nm),  $R_t$  (major) = 15.5 min,  $R_t$  (minor) = 11.0 min; IR (KBr thin film,  $\text{cm}^{-1}$ ):  $\nu$  2983, 1559, 1548, 1479, 1465, 1275, 1267, 1048, 1028, 906, 778, 673.

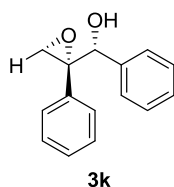

**(*R*)-phenyl((*R*)-2-phenyloxiran-2-yl)methanol (3k):** Yellow liquid, 20.8 mg, 46% yield.  $^1\text{H}$  NMR (600 MHz,  $\text{CDCl}_3$ )  $\delta$  7.28–7.22 (m, 5H), 7.22–7.15 (m, 5H), 5.06 (d,  $J = 7.1$  Hz, 1H), 3.41 (d,  $J = 5.5$  Hz, 1H), 2.80 (d,  $J = 5.5$  Hz, 1H), 2.34 (d,  $J = 7.1$  Hz, 1H);  $^{13}\text{C}$  NMR (150 MHz,  $\text{CDCl}_3$ )  $\delta$  139.9, 137.0, 128.4, 128.1, 128.0, 127.8, 127.3, 127.2, 75.0, 63.5, 52.4; HRMS (ESI,  $m/z$ ): calcd. for  $\text{C}_{15}\text{H}_{14}\text{O}_2\text{Na}^+$  249.0087, found 249.0088;  $[\alpha]_{\text{D}}^{25}$ : +18.0 (c 1.5,  $\text{CHCl}_3$ ); HPLC analysis: 85% *ee* (Chiralcel AD-H, 1:99  $i$ PrOH/Hexane, 1 mL/min, 220 nm),  $R_t$  (major) = 27.3 min,  $R_t$  (minor) = 37.0 min; IR (KBr thin film,  $\text{cm}^{-1}$ ):  $\nu$  3037, 1687, 1601, 1582, 1510, 1446, 1275, 1187, 1031, 838, 775, 698.

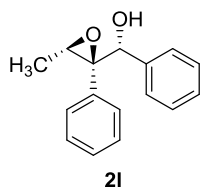

**(*R*)-((2*R*,3*S*)-3-methyl-2-phenyloxiran-2-yl)(phenyl)methanol (2l):** White solid, mp 84–85 °C, 17.3 mg, 36% yield.  $^1\text{H}$  NMR (600 MHz,  $\text{CDCl}_3$ )  $\delta$  7.30–7.25 (m, 3H), 7.25–7.19 (m, 3H), 7.18–7.15 (m, 2H), 6.98–6.96 (m, 2H), 4.86 (s, 1H), 3.63 (q,  $J = 5.5$  Hz, 1H), 2.71 (d,  $J = 1.1$  Hz, 1H), 1.03 (d,  $J = 5.5$  Hz, 3H);  $^{13}\text{C}$  NMR (150 MHz,  $\text{CDCl}_3$ )  $\delta$  139.1, 135.1, 128.4, 128.3, 128.2, 127.91, 127.88, 127.8, 76.2, 68.7, 56.4, 15.0; HRMS (ESI,  $m/z$ ): calcd. for  $\text{C}_{16}\text{H}_{16}\text{O}_2\text{Na}^+$  263.1043, found 263.1040;  $[\alpha]_{\text{D}}^{25}$ : +27.8 (c 0.3,  $\text{CHCl}_3$ ); HPLC analysis: 80% *ee* (Chiralcel AD-H, 5:95  $i$ PrOH/Hexane, 1 mL/min, 254 nm),  $R_t$  (major) = 7.4 min,  $R_t$  (minor) = 8.7 min; IR (KBr thin film,  $\text{cm}^{-1}$ ):  $\nu$  2991, 1539, 1454, 1414, 1315, 1283, 1264, 1133, 920, 897, 767, 676.

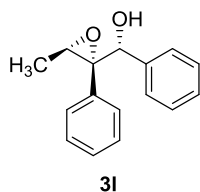

**(R)-((2S,3R)-3-methyl-2-phenyloxiran-2-yl)(phenyl)methanol (3l):** White solid, mp 141–142 °C, 17.3 mg, 36% yield.  $^1\text{H}$  NMR (600 MHz,  $\text{CDCl}_3$ )  $\delta$  7.24–7.15 (m, 8H), 7.04–7.01 (m, 2H), 4.94 (d,  $J$  = 6.9 Hz, 1H), 3.68 (q,  $J$  = 5.5 Hz, 1H), 2.37 (d,  $J$  = 6.9 Hz, 1H), 1.00 (d,  $J$  = 5.5 Hz, 3H);  $^{13}\text{C}$  NMR (150 MHz,  $\text{CDCl}_3$ )  $\delta$  140.2, 135.1, 128.2, 128.0, 127.9, 127.8, 127.6, 127.0, 76.1, 68.6, 57.3, 14.7; HRMS (ESI,  $m/z$ ): calcd. for  $\text{C}_{16}\text{H}_{16}\text{O}_2\text{Na}^+$  263.1043, found 263.1044;  $[\alpha]_{\text{D}}^{25}$ : 12.4 (c 0.6,  $\text{CHCl}_3$ ); HPLC analysis: 86% *ee* (Chiralcel AD-H, 0.5:99.5  $i$ PrOH/Hexane, 1 mL/min, 220 nm),  $R_t$  (major) = 38.4 min,  $R_t$  (minor) = 28.9 min; IR (KBr thin film,  $\text{cm}^{-1}$ ):  $\nu$  2988, 1556, 1454, 1414, 1280, 1263, 1230, 1130, 1016, 894, 769, 678.

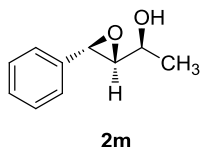

**(R)-1-((2R,3S)-3-phenyloxiran-2-yl)ethan-1-ol (2m):** Colourless liquid, 14.1 mg, 43% yield.  $^1\text{H}$  NMR (600 MHz,  $\text{CDCl}_3$ )  $\delta$  7.36–7.26 (m, 5H), 4.12–4.08 (m, 1H), 3.94 (d,  $J$  = 2.2 Hz, 1H), 3.08 (dd,  $J$  = 2.8, 2.3 Hz, 1H), 2.17 (s, 1H), 1.31 (d,  $J$  = 6.5 Hz, 3H);  $^{13}\text{C}$  NMR (150 MHz,  $\text{CDCl}_3$ )  $\delta$  137.0, 128.6, 128.4, 125.8, 65.7, 64.9, 54.8, 18.8; HRMS (ESI,  $m/z$ ): calcd. for  $\text{C}_{10}\text{H}_{12}\text{O}_2\text{Na}^+$  187.0730, found 187.0729;  $[\alpha]_{\text{D}}^{25}$ : 7.4 (c 1.8,  $\text{CHCl}_3$ ); HPLC analysis: 89% *ee* (Chiralcel AD-H, 10:90  $i$ PrOH/Hexane, 1 mL/min, 220 nm),  $R_t$  (major) = 5.1 min,  $R_t$  (minor) = 4.2 min; IR (KBr thin film,  $\text{cm}^{-1}$ ):  $\nu$  2988, 1571, 1542, 1466, 1335, 1281, 1261, 1150, 1031, 951, 778, 681.

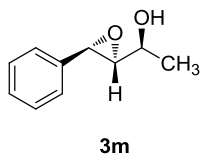

**(R)-1-((2S,3R)-3-phenyloxiran-2-yl)ethan-1-ol (3m):** Colourless liquid, 17.4 mg, 53% yield.  $^1\text{H}$  NMR (600 MHz,  $\text{CDCl}_3$ )  $\delta$  7.36–7.33 (m, 2H), 7.32–7.29 (m, 1H), 7.29–7.25 (m, 2H), 3.86 (d,  $J$  = 2.1 Hz, 1H), 3.04 (dd,  $J$  = 4.6, 2.2 Hz, 1H), 1.96 (d,  $J$  = 6.0 Hz, 1H), 1.35 (d,  $J$  = 6.5 Hz, 3H);  $^{13}\text{C}$  NMR (150 MHz,  $\text{CDCl}_3$ )  $\delta$  136.8, 128.6, 128.4, 125.8, 67.3, 66.4, 56.7, 20.2; HRMS (ESI,  $m/z$ ): calcd. for  $\text{C}_{10}\text{H}_{12}\text{O}_2\text{Na}^+$  187.0730, found 187.0729;  $[\alpha]_{\text{D}}^{25}$ : +10.8 (c 0.3,  $\text{CHCl}_3$ ); HPLC analysis: 56% *ee* (Chiralcel AD-H, 5:95  $i$ PrOH/Hexane, 1 mL/min, 220

nm),  $R_t$  (major) = 11.9 min,  $R_t$  (minor) = 7.1 min; IR (KBr thin film,  $\text{cm}^{-1}$ ):  $\nu$  2994, 1542, 1463, 1375, 1340, 1284, 1218, 1090, 1014, 900, 772, 701.

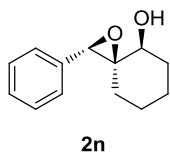

**(2*S*,3*R*,4*R*)-2-phenyl-1-oxaspiro[2.5]octan-4-ol (2n):** Yellow solid, mp 102–103 °C, 18.8 mg, 46% yield.  $^1\text{H}$  NMR (600 MHz,  $\text{CDCl}_3$ )  $\delta$  7.36–7.25 (m, 5H), 4.34 (s, 1H), 3.88 (ddd,  $J$  = 10.9, 4.3, 1.6 Hz, 1H), 2.24–2.14 (m, 2H), 1.77–1.73 (m, 1H), 1.64–1.62 (m, 1H), 1.54–1.46 (m, 2H), 1.41–1.33 (m, 2H), 1.05–0.96 (m, 1H);  $^{13}\text{C}$  NMR (150 MHz,  $\text{CDCl}_3$ )  $\delta$  135.8, 128.1, 127.4, 126.3, 70.6, 68.5, 58.8, 33.3, 27.1, 24.6, 23.9; HRMS (ESI,  $m/z$ ): calcd. for  $\text{C}_{13}\text{H}_{16}\text{O}_2\text{Na}^+$  227.1043, found 227.1042;  $[\alpha]_D^{25}$ : +12.5 (c 0.8,  $\text{CHCl}_3$ ); HPLC analysis: >99% *ee* (Chiralcel AD-H, 0.5:99.5 *i*PrOH/Hexane, 1 mL/min, 220 nm),  $R_t$  (major) = 13.9 min,  $R_t$  (minor) = 17.4 min; IR (KBr thin film,  $\text{cm}^{-1}$ ):  $\nu$  2983, 1539, 1463, 1420, 1278, 1264, 1221, 1019, 931, 897, 772, 693.

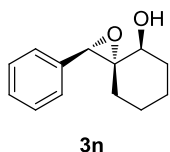

**(2*R*,3*S*,4*R*)-2-phenyl-1-oxaspiro[2.5]octan-4-ol (3n):** White solid, mp 64–65 °C, 20.7 mg, 51% yield.  $^1\text{H}$  NMR (600 MHz,  $\text{CDCl}_3$ )  $\delta$  7.35–7.32 (m, 2H), 7.29–7.26 (m, 3H), 4.30 (s, 1H), 3.73 (td,  $J$  = 9.1, 4.2 Hz, 1H), 2.01–1.95 (m, 1H), 1.78 (d,  $J$  = 8.9 Hz, 1H), 1.79–1.75 (m, 1H), 1.64–1.59 (m, 1H), 1.56–1.52 (m, 1H), 1.52–1.43 (m, 2H), 1.42–1.34 (m, 1H), 1.25–1.19 (m, 1H);  $^{13}\text{C}$  NMR (150 MHz,  $\text{CDCl}_3$ )  $\delta$  135.7, 128.1, 127.5, 126.4, 70.3, 67.2, 60.7, 33.9, 26.1, 23.6, 23.0; HRMS (ESI,  $m/z$ ): calcd. for  $\text{C}_{13}\text{H}_{16}\text{O}_2\text{Na}^+$  227.1043, found 227.1044;  $[\alpha]_D^{25}$ : +8.2 (c 1.1,  $\text{CHCl}_3$ ); HPLC analysis: 96% *ee* (Chiralcel AD-H, 0.5:99.5 *i*PrOH/Hexane, 1 mL/min, 220 nm),  $R_t$  (major) = 29.5 min,  $R_t$  (minor) = 12.0 min; IR (KBr thin film,  $\text{cm}^{-1}$ ):  $\nu$  2929, 1539, 1463, 1420, 1278, 1264, 1221, 1019, 931, 897, 772, 693.

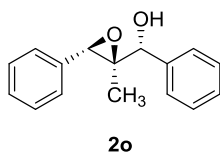

**(*R*)-((2*R*,3*S*)-2-methyl-3-phenyloxiran-2-yl)(phenyl)methanol (2o):** Colourless liquid, 17.3 mg, 36% yield.  $^1\text{H}$  NMR (600 MHz,  $\text{CDCl}_3$ )  $\delta$  7.47–7.45 (m, 2H), 7.41–7.38 (m, 2H), 7.35–

7.31 (m, 3H), 7.28–7.24 (m, 3H), 4.83 (s, 1H), 4.51 (s, 1H), 2.74 (s, 1H), 0.98 (s, 3H);  $^{13}\text{C}$  NMR (150 MHz,  $\text{CDCl}_3$ )  $\delta$  139.6, 135.4, 128.7, 128.5, 128.2, 127.7, 127.4, 126.4, 75.4, 66.1, 59.7, 13.7; HRMS (ESI,  $m/z$ ): calcd. for  $\text{C}_{16}\text{H}_{16}\text{O}_2\text{Na}^+$  263.1043, found 263.1045;  $[\alpha]_{\text{D}}^{25}$ : 2.6 (c 1.2,  $\text{CHCl}_3$ ); HPLC analysis: 58% *ee* (Chiralcel AD-H, 10:90  $i$ PrOH/Hexane, 1 mL/min, 220 nm),  $R_t$  (major) = 6.5 min,  $R_t$  (minor) = 4.8 min; IR (KBr thin film,  $\text{cm}^{-1}$ ):  $\nu$  2934, 1553, 1454, 1412, 1340, 1280, 1261, 1093, 980, 852, 775, 687.

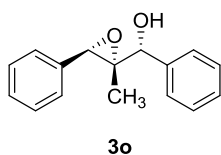

**(R)-((2S,3R)-2-methyl-3-phenyloxiran-2-yl)(phenyl)methanol (3o):** White solid, mp 97–98 °C, 25.0 mg, 52% yield.  $^1\text{H}$  NMR (600 MHz,  $\text{CDCl}_3$ )  $\delta$  7.48–7.43 (m, 2H), 7.41–7.26 (m, 8H), 4.66 (s, 1H), 4.36 (s, 1H), 2.54 (s, 1H), 0.92 (s, 3H);  $^{13}\text{C}$  NMR (150 MHz,  $\text{CDCl}_3$ )  $\delta$  140.3, 135.4, 128.7, 128.3, 128.1, 127.8, 126.6, 126.5, 77.3, 66.5, 61.7, 11.9; HRMS (ESI,  $m/z$ ): calcd. for  $\text{C}_{16}\text{H}_{16}\text{O}_2\text{Na}^+$  263.1043, found 263.1042;  $[\alpha]_{\text{D}}^{25}$ : +23.5 (c 0.8,  $\text{CHCl}_3$ ); HPLC analysis: 34% *ee* (Chiralcel AD-H, 10:90  $i$ PrOH/Hexane, 1 mL/min, 220 nm),  $R_t$  (major) = 6.4 min,  $R_t$  (minor) = 5.4 min; IR (KBr thin film,  $\text{cm}^{-1}$ ):  $\nu$  2858, 1562, 1451, 1402, 1340, 1287, 1224, 1059, 928, 852, 772, 693.

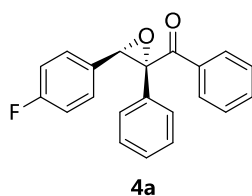

**((2R,3R)-3-(4-fluorophenyl)-2-phenyloxiran-2-yl)(phenyl)methanone (4a):** White solid, mp 93–94 °C, 15.3 mg, 96% yield.  $^1\text{H}$  NMR (600 MHz,  $\text{CDCl}_3$ )  $\delta$  8.14–8.12 (m, 2H), 7.57–7.53 (m, 1H), 7.46–7.42 (m, 4H), 7.23–7.13 (m, 5H), 6.88–6.84 (m, 2H), 4.49 (s, 1H);  $^{13}\text{C}$  NMR (150 MHz,  $\text{CDCl}_3$ )  $\delta$  195.2, 162.6 (d,  $J$  = 245.4 Hz), 134.1, 133.9, 131.8, 130.0, 129.2 (d,  $J$  = 2.5 Hz), 128.7, 128.54, 128.48, 128.3, 127.6, 115.1 (d,  $J$  = 21.7 Hz), 71.3, 62.6; HRMS (ESI,  $m/z$ ): calcd. for  $\text{C}_{21}\text{H}_{15}\text{O}_2\text{FH}^+$  319.1129, found 319.1132;  $[\alpha]_{\text{D}}^{25}$ : 25.0 (c 0.9,  $\text{CHCl}_3$ ); HPLC analysis: 91% *ee* (Chiralcel AD-H, 5:95  $i$ PrOH/Hexane, 1 mL/min),  $R_t$  (major) = 5.3 min,  $R_t$  (minor) = 4.8 min; IR (KBr thin film,  $\text{cm}^{-1}$ ):  $\nu$  3037, 1687, 1601, 1582, 1510, 1446, 1275, 1187, 1031, 838, 775, 698.



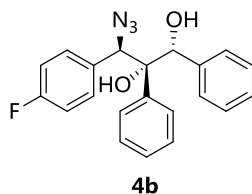

**(1*R*,2*R*,3*R*)-3-azido-3-(4-fluorophenyl)-1,2-diphenylpropane-1,2-diol (4b):** White solid, mp 78–79 °C, 10.7 mg, 98% yield. <sup>1</sup>H NMR (600 MHz, CDCl<sub>3</sub>) δ 7.16–7.09 (m, 10H), 6.91–6.88 (m, 2H), 6.85–6.82 (m, 2H), 5.53 (d, *J* = 3.2 Hz, 1H), 5.28 (s, 1H), 2.70 (s, 1H), 2.64 (d, *J* = 3.3 Hz, 1H); <sup>13</sup>C NMR (150 MHz, CDCl<sub>3</sub>) δ 162.6 (d, *J* = 245.3 Hz), 139.1, 138.2, 131.3 (d, *J* = 2.4 Hz), 130.9, 130.8, 128.14, 128.07, 128.0, 127.4, 126.8 (d, *J* = 7.6 Hz), 114.7 (d, *J* = 21.3 Hz), 80.1, 76.0, 69.7; HRMS (ESI, *m/z*): calcd. for C<sub>21</sub>H<sub>18</sub>O<sub>2</sub>N<sub>3</sub>Na<sup>+</sup> 386.1277, found 386.1279; [α]<sub>D</sub><sup>25</sup>: 27.4 (c 1.1, CHCl<sub>3</sub>); HPLC analysis: 91% *ee* (Chiralcel AD-H, 15:85 *i*PrOH/Hexane, 1 mL/min), *R*<sub>t</sub> (major) = 6.6 min, *R*<sub>t</sub> (minor) = 4.8 min; IR (KBr thin film, cm<sup>-1</sup>): ν 2108, 1556, 1508, 1409, 1340, 1278, 1258, 1221, 1090, 772, 704, 678.

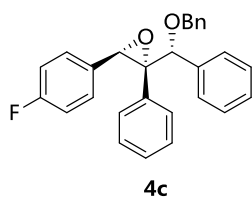

**(2*R*,3*R*)-2-((*R*)-(benzyloxy)(phenyl)methyl)-3-(4-fluorophenyl)-2-phenyloxirane (4c):** White solid, mp 94–95 °C, 18.0 mg, 88% yield. <sup>1</sup>H NMR (600 MHz, CDCl<sub>3</sub>) δ 7.37–7.28 (m, 8H), 7.24–7.22 (m, 2H), 7.11–7.08 (m, 1H), 7.06–7.03 (m, 2H), 6.91–6.85 (m, 4H), 6.76–6.72 (m, 2H), 4.74 (s, 1H), 4.64 (d, *J* = 12.1 Hz, 1H), 4.57 (s, 1H), 4.68 (d, *J* = 12.1 Hz, 1H); <sup>13</sup>C NMR (150 MHz, CDCl<sub>3</sub>) 162.2 (d, *J* = 244.2 Hz), 138.2, 137.3, 134.2, 131.0 (d, *J* = 2.4 Hz), 129.1, 128.5, 128.3, 128.2, 128.1, 128.0, 127.7, 127.6, 127.5, 127.4, 114.7 (d, *J* = 21.5 Hz), 83.3, 71.1, 71.0, 60.7; HRMS (ESI, *m/z*): calcd. for C<sub>28</sub>H<sub>23</sub>FO<sub>2</sub>H<sup>+</sup> 411.1755, found 411.1756; [α]<sub>D</sub><sup>25</sup>: +11.4 (c 2.9, CHCl<sub>3</sub>); HPLC analysis: 96% *ee* (Chiralcel AD-H, 1:99 *i*PrOH/Hexane, 1 mL/min), *R*<sub>t</sub> (major) = 17.3 min, *R*<sub>t</sub> (minor) = 5.9 min; IR (KBr thin film, cm<sup>-1</sup>): ν 1618, 1565, 1537, 1451, 1394, 1335, 1281, 1264, 1099, 1025, 778, 690.

## VII. $^1\text{H}$ NMR and $^{13}\text{C}$ NMR spectra of new compounds

zzf180612-Br  
single\_pulse

8.1347  
8.1328  
8.1209  
8.1187  
7.5481  
7.5357  
7.4571  
7.4493  
7.4465  
7.4434  
7.4380  
7.4353  
7.4333  
7.4312  
7.3867  
7.3857  
7.3827  
7.2926  
7.2527  
7.2142  
7.2112  
7.2042  
7.2020  
7.1925  
7.1808  
7.0693  
7.0666  
7.0582  
7.0573  
7.0573

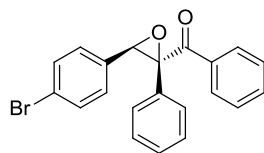

**1a** (*rac*-)

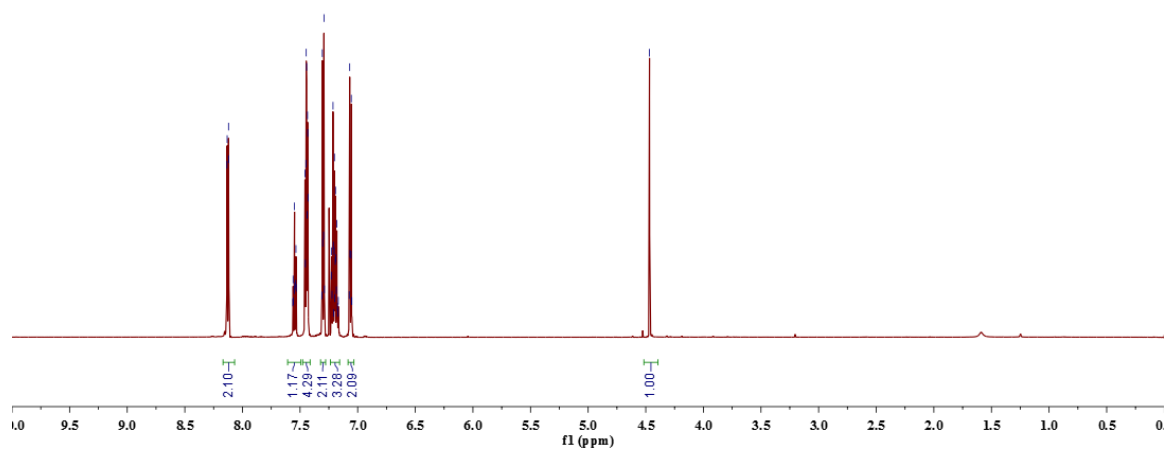

zzf180612-Br  
single\_pulse decoupled gated NOE

19.667

133.99  
133.95  
132.53  
131.66  
131.18  
129.98  
128.67  
128.58  
128.46  
128.40  
127.52  
122.27

71.33

62.63

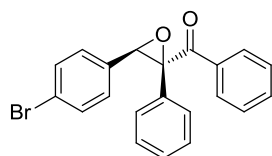

**1a** (*rac*-)

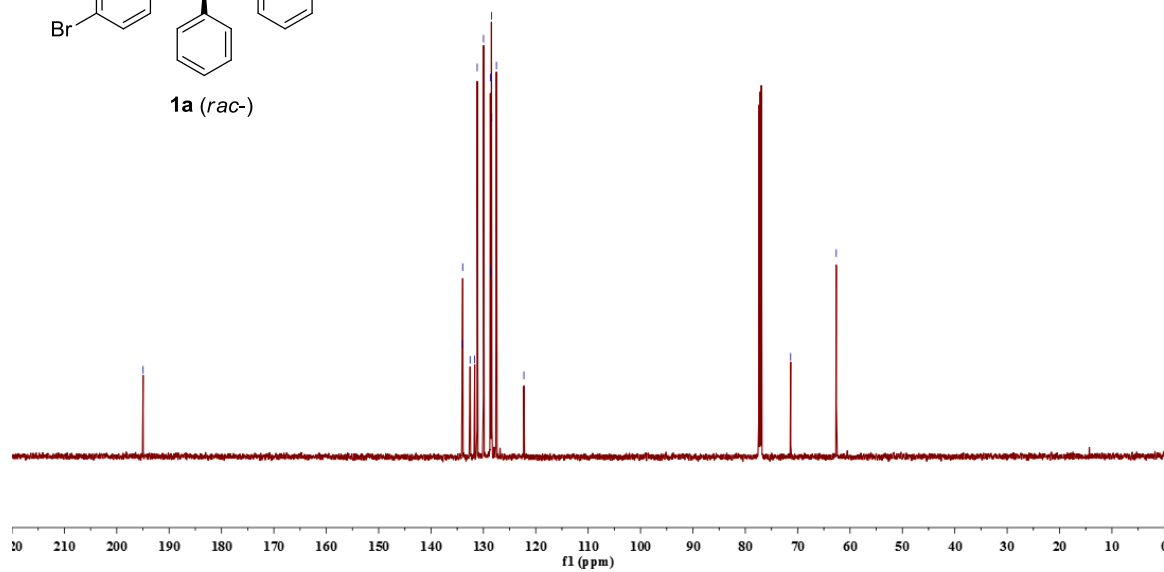

xwc180516-h63

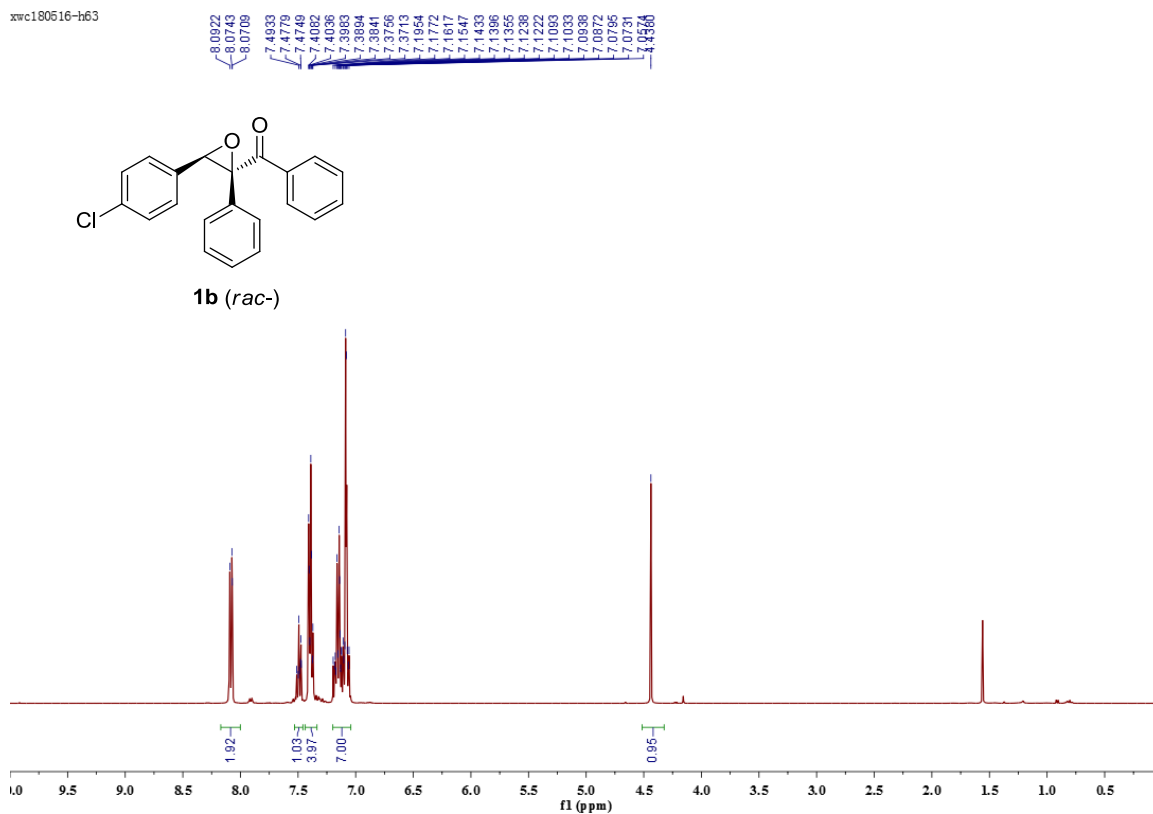

xwc180517-h63-c

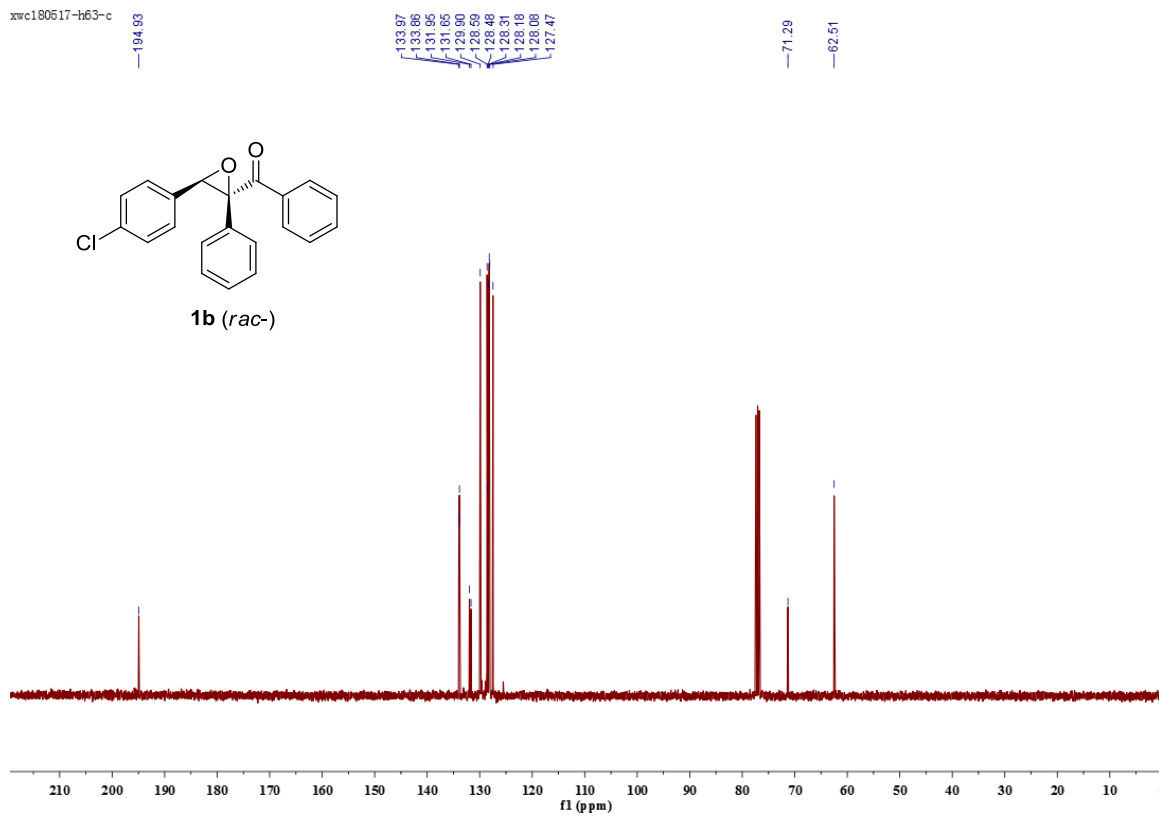

zzf180925-1e  
single\_pulse

8.1434  
8.1430  
8.1333  
8.1301  
8.1279  
7.4519  
7.4492  
7.4456  
7.4380  
7.4359  
7.4342  
6.8730  
6.8651  
6.8620  
6.8588  
6.8508  
6.8474

4.4973

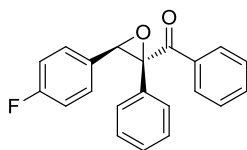

**1c** (*rac*-)

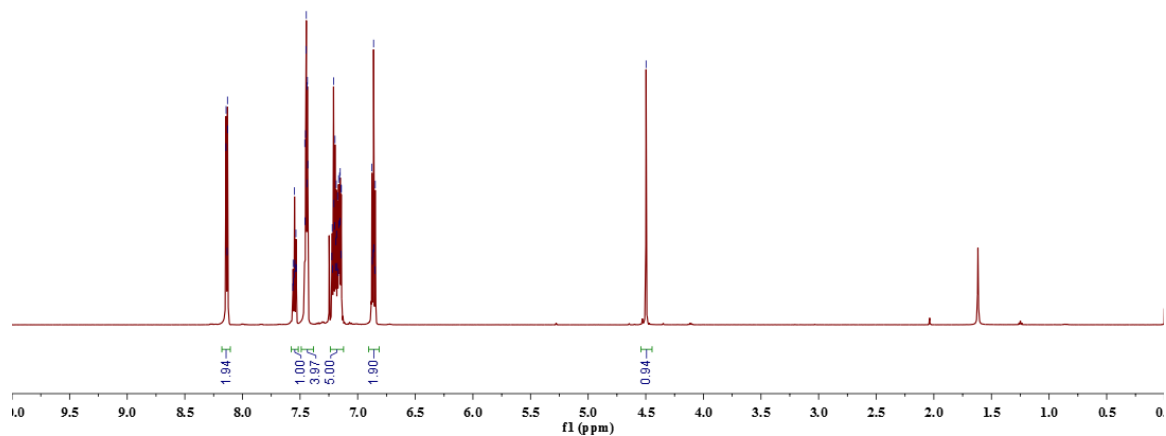

zzf180925-1e  
single\_pulse decoupled gated NOE

194.15

163.37  
161.74

134.06  
133.91  
131.83  
129.97  
129.22  
128.20  
128.05  
128.04  
128.48  
127.57  
115.13  
114.99

71.30

62.60

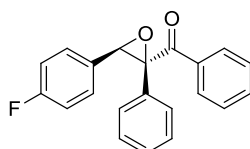

**1c** (*rac*-)

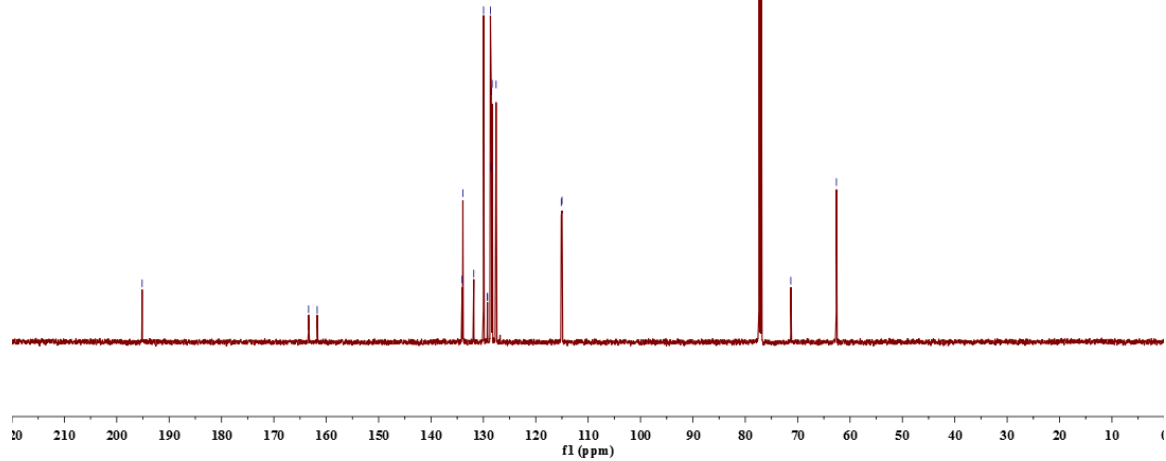



ZZF180626-1  
single\_pulse

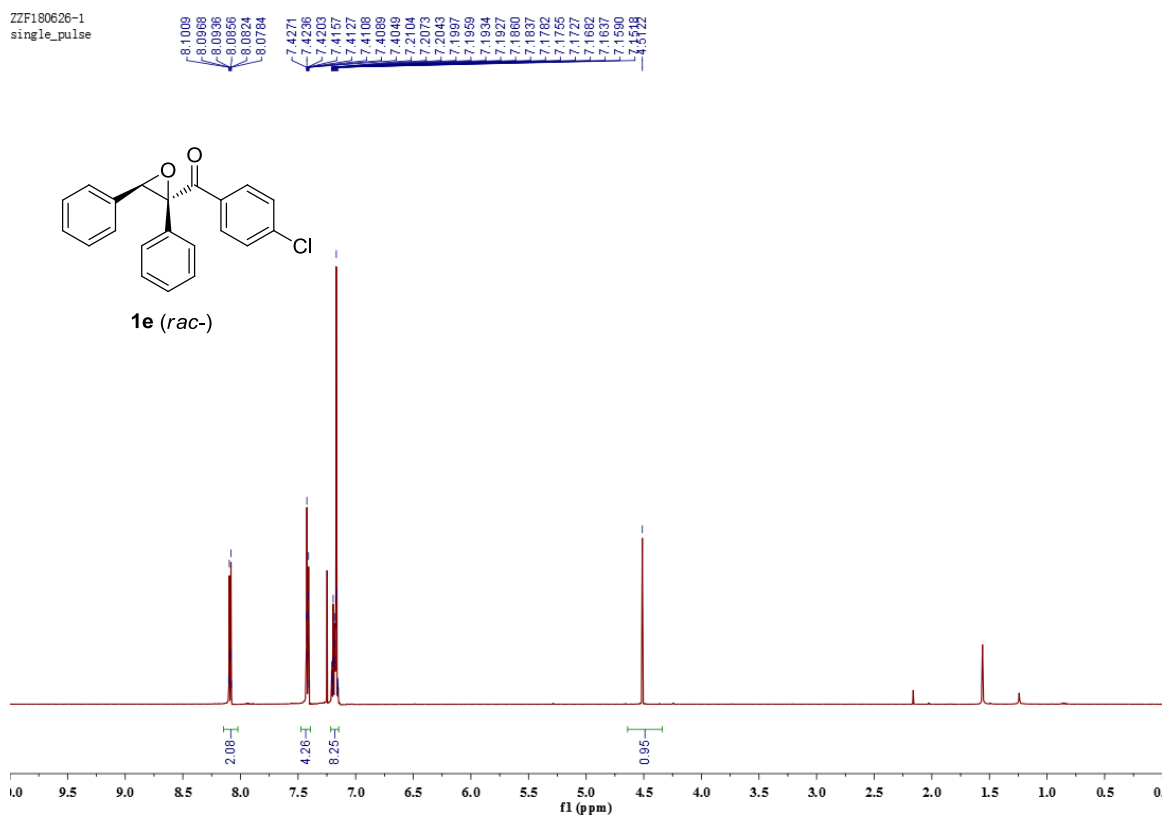

zzf180626-1-C  
single pulse decoupled gated NOE

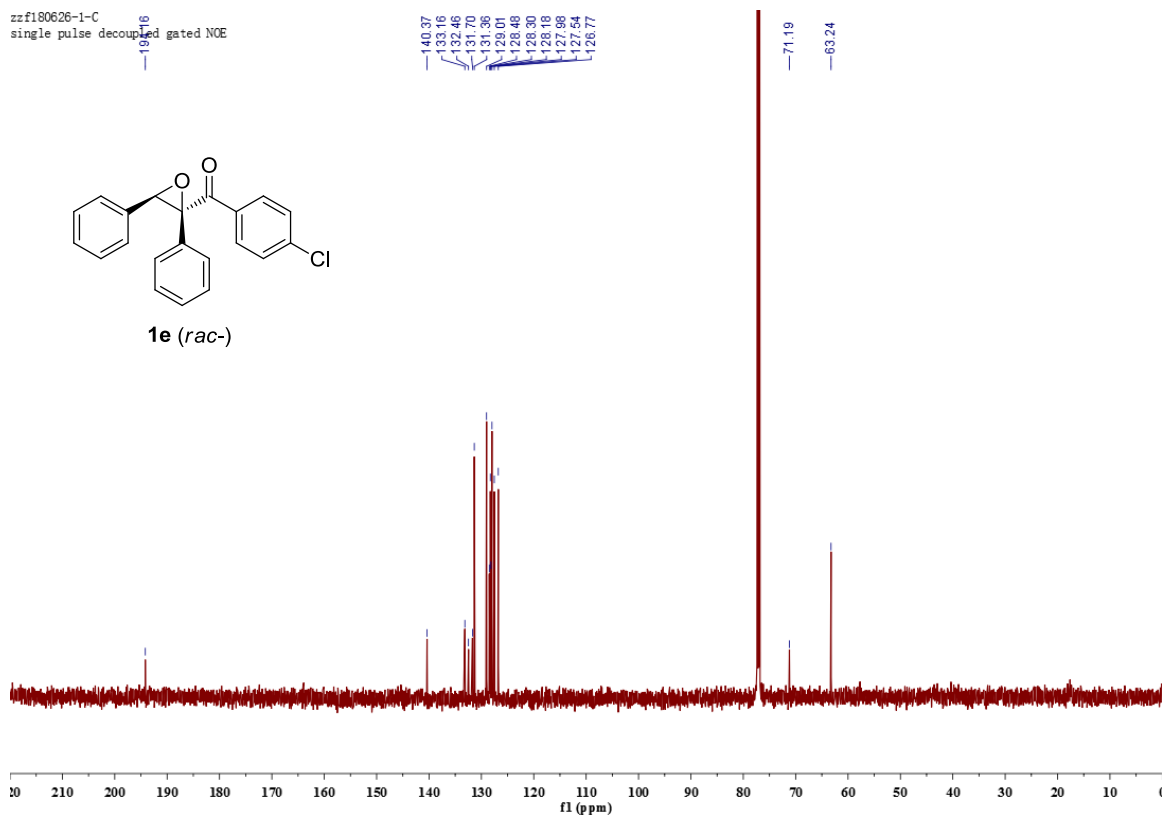

zzf180921-1g  
single\_pulse

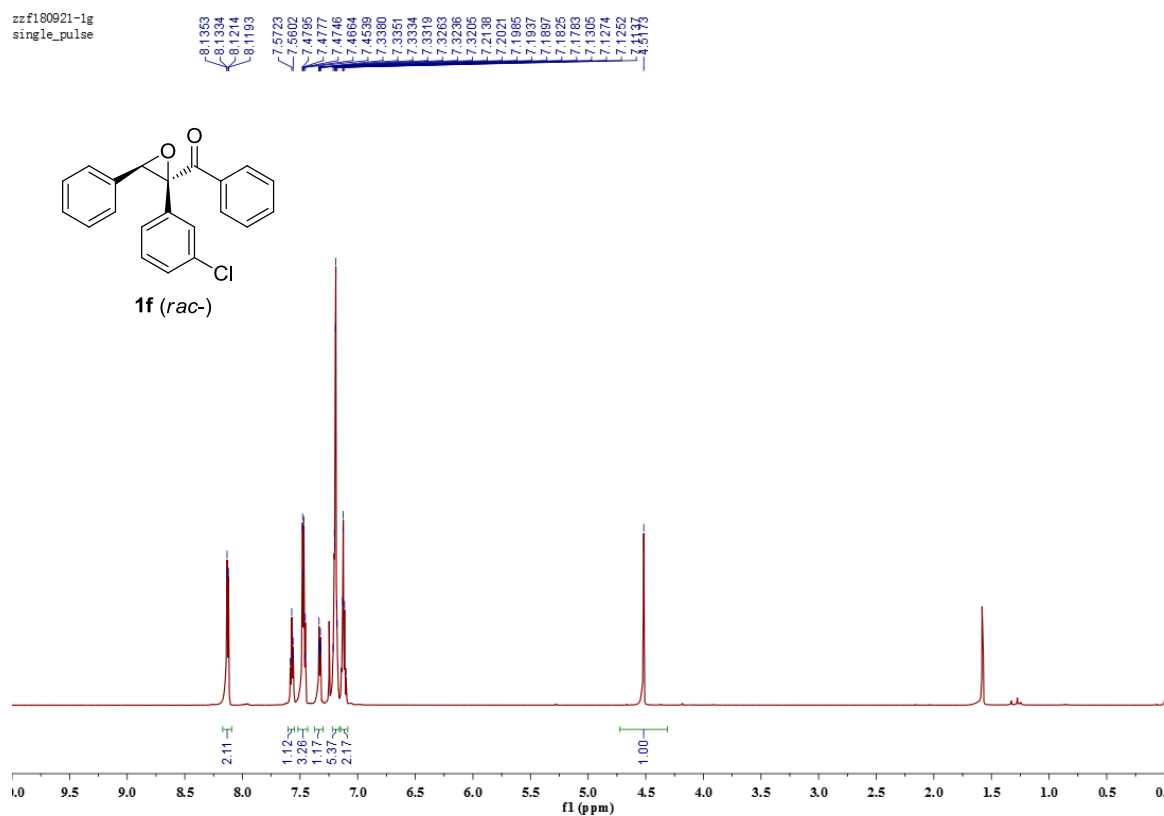

zzf180921-1g  
single pulse decoupled gated NOE

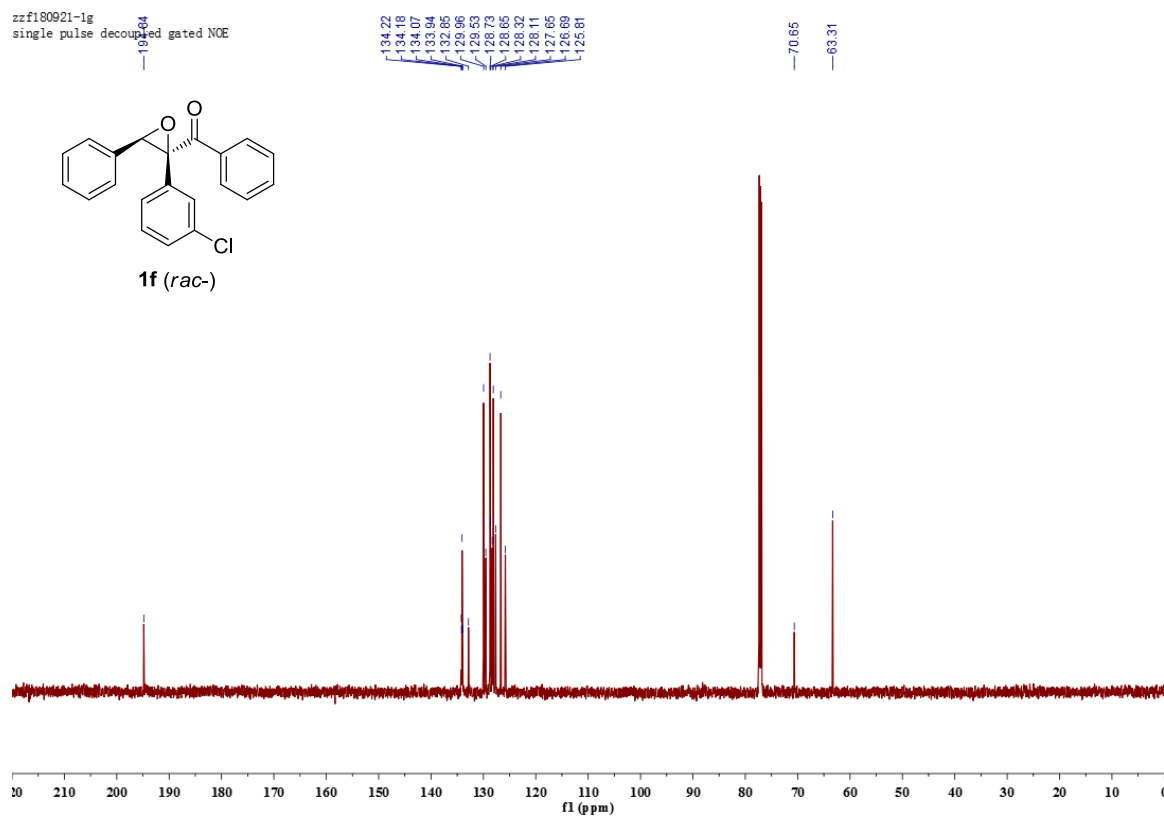

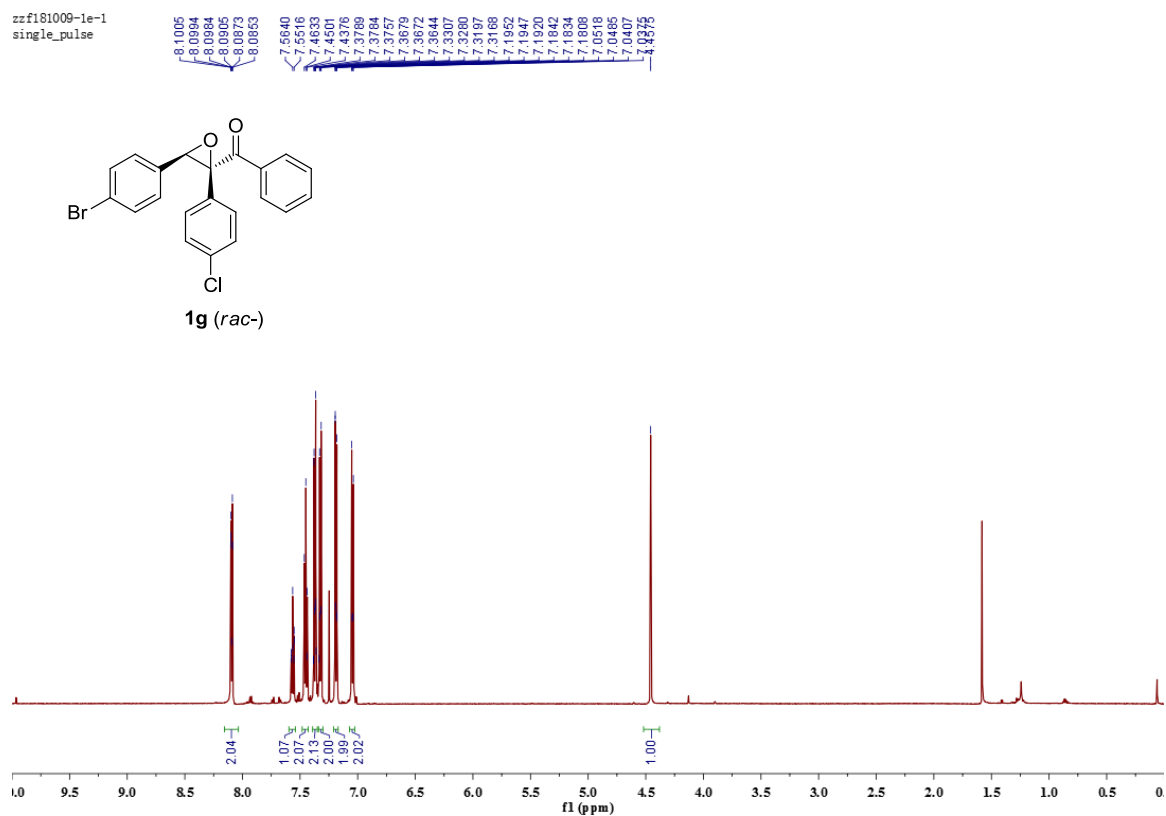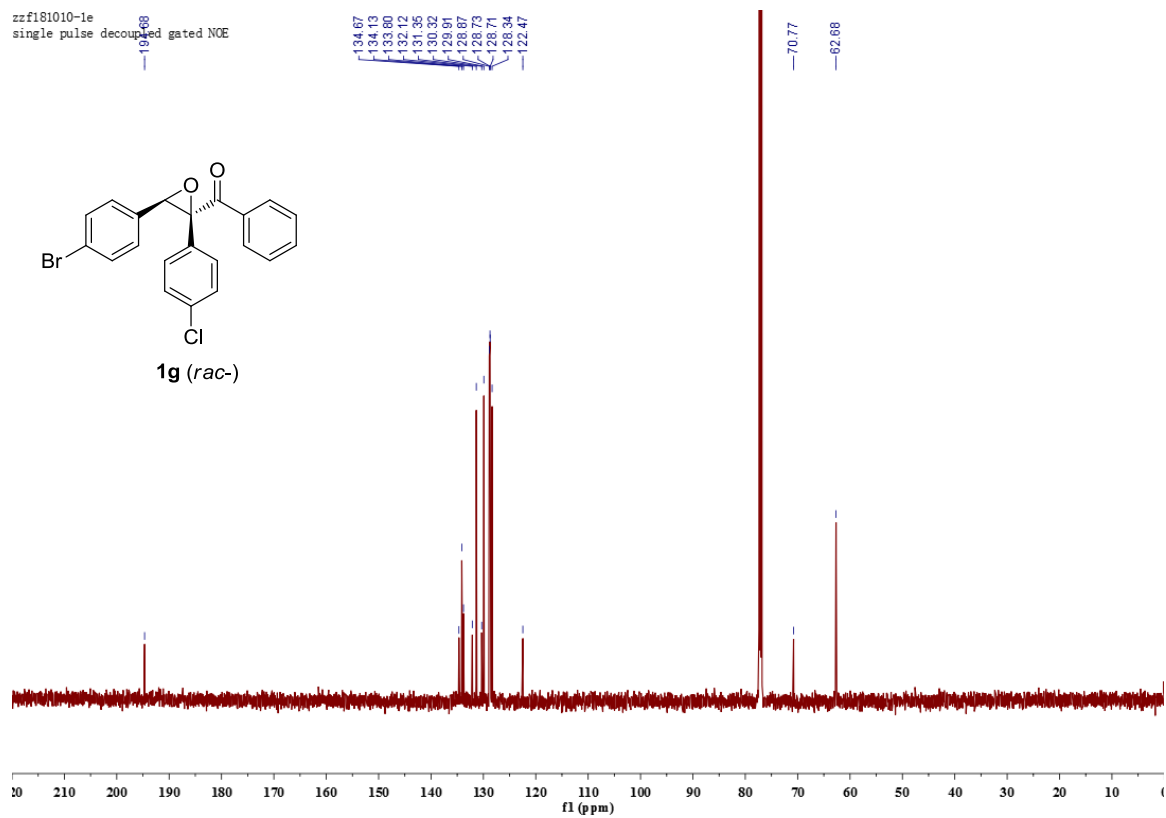



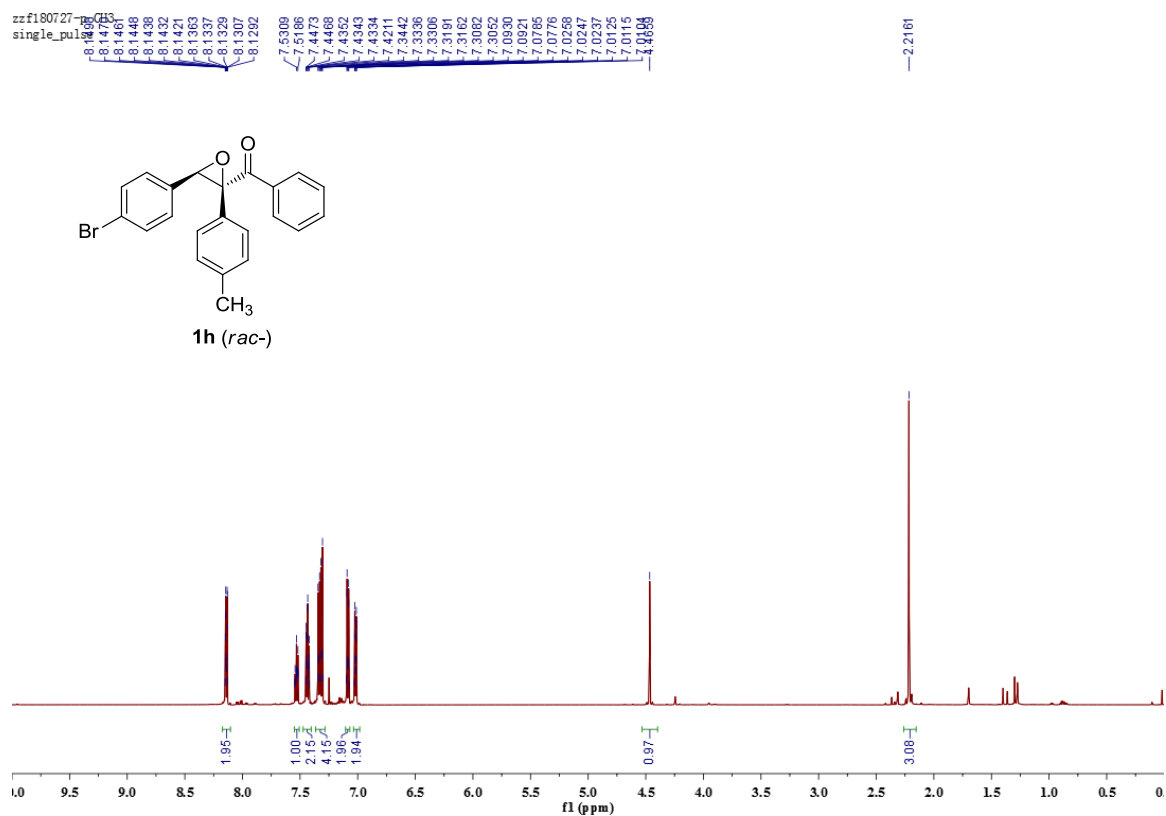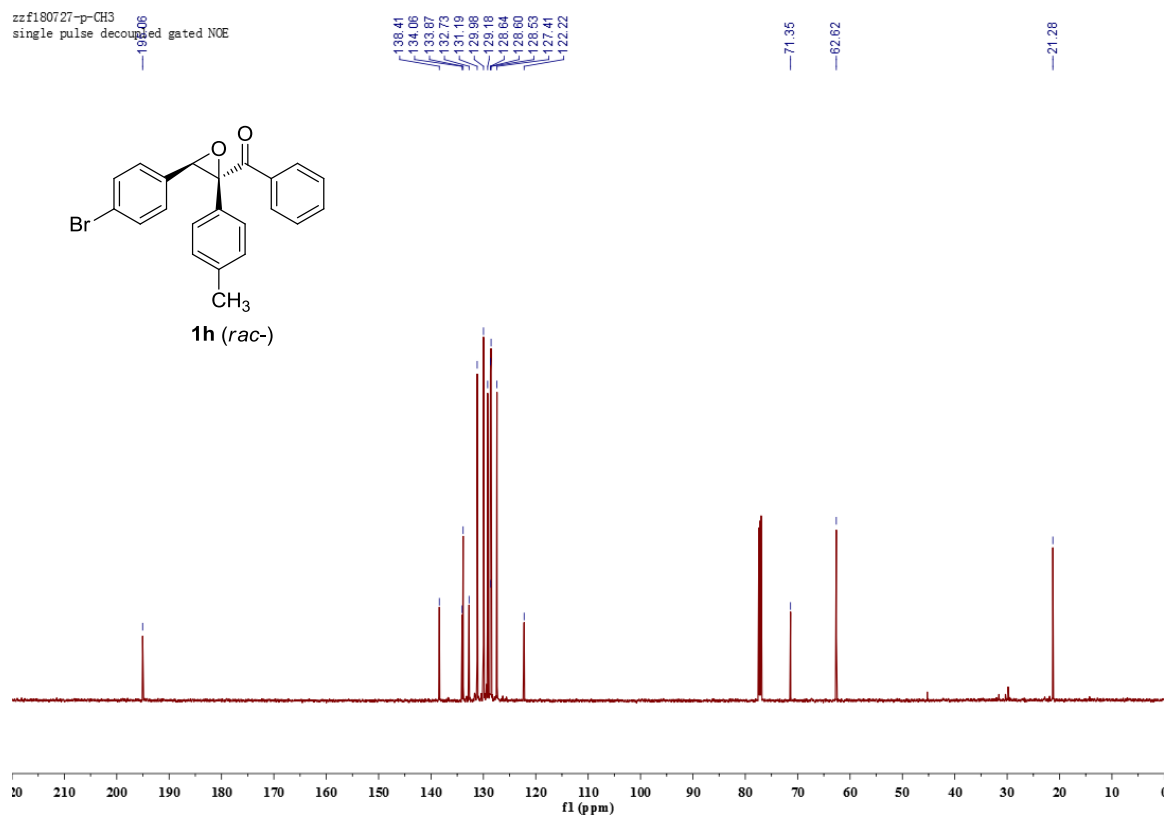

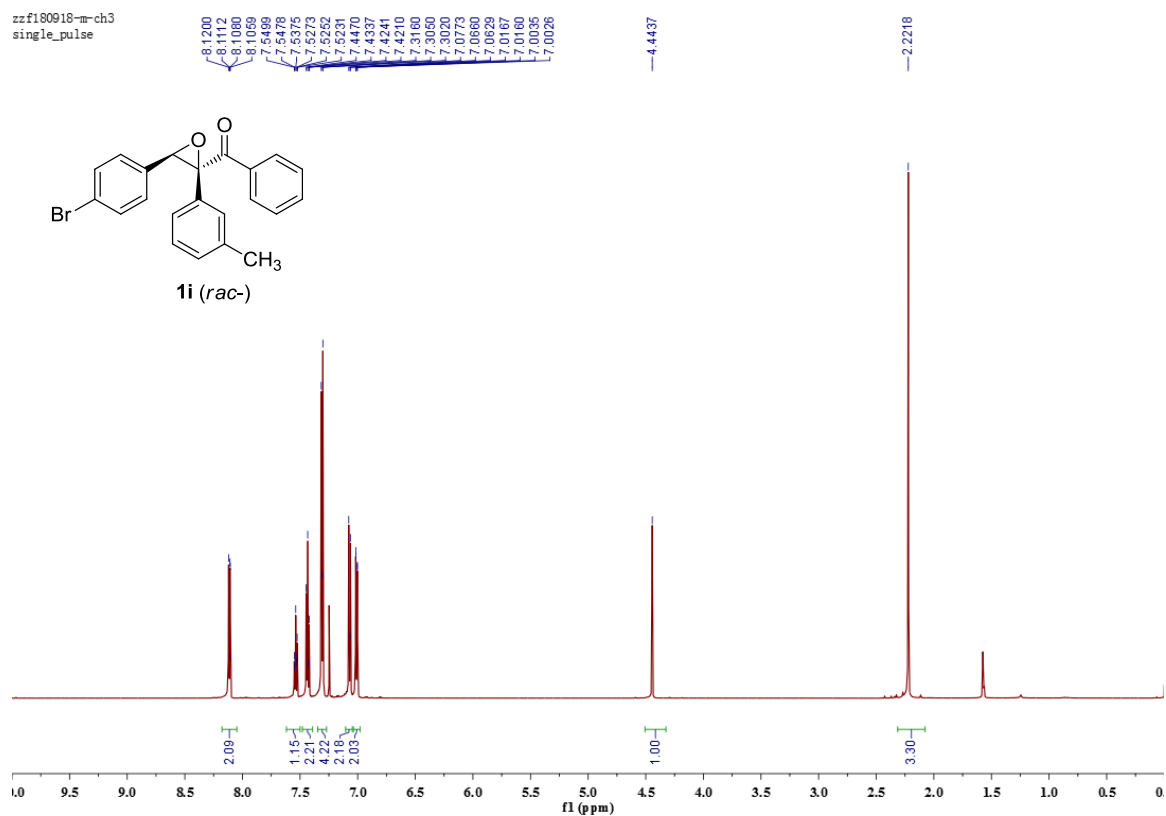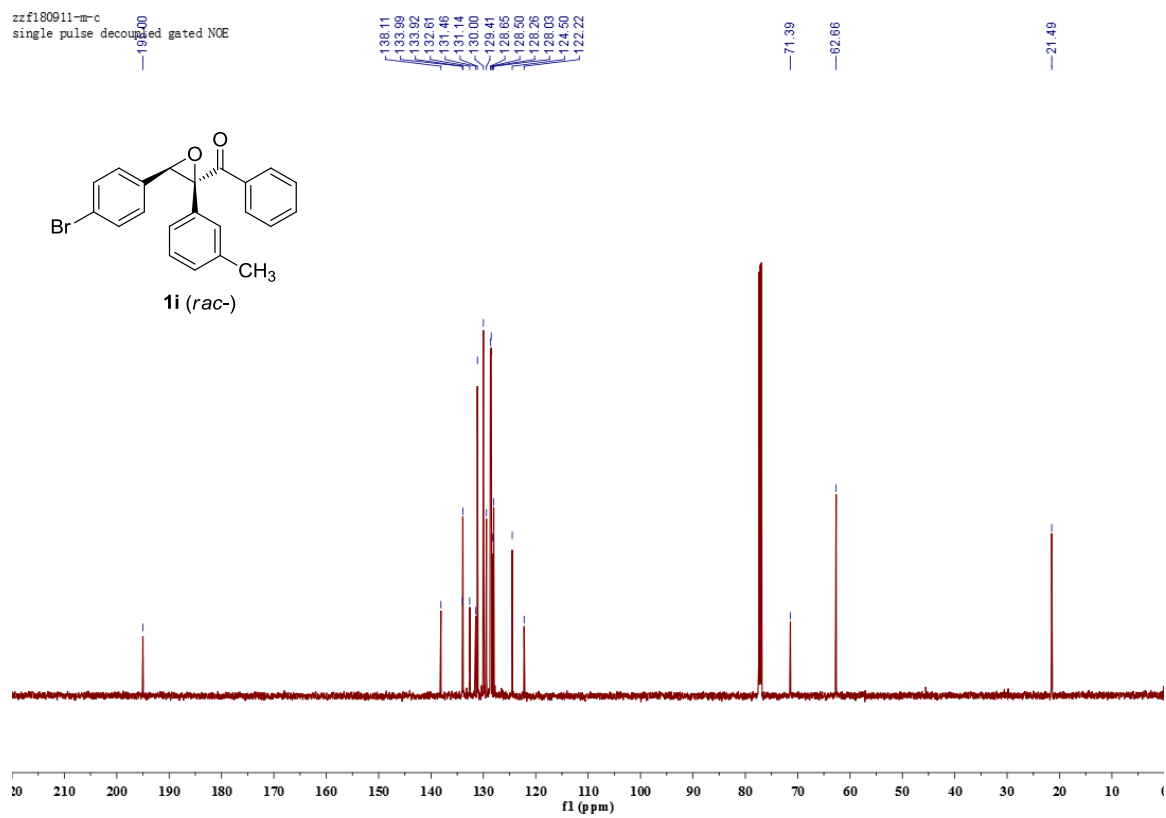

zzf180921-lc 1  
single\_pulse

8.0789  
8.0749  
8.0717  
8.0637  
8.0604  
8.0565  
7.4201  
7.4161  
7.4131  
7.4098  
7.4050  
7.4018  
7.3019  
7.2988  
7.2877  
7.2805  
7.2467  
7.2430  
7.2135  
7.2119  
7.2082  
7.2037  
7.1986  
7.1960  
7.1870  
7.0531  
7.0507  
7.0419  
7.0383

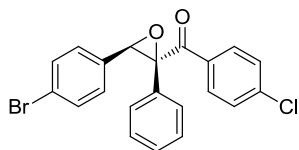

1j (rac-)

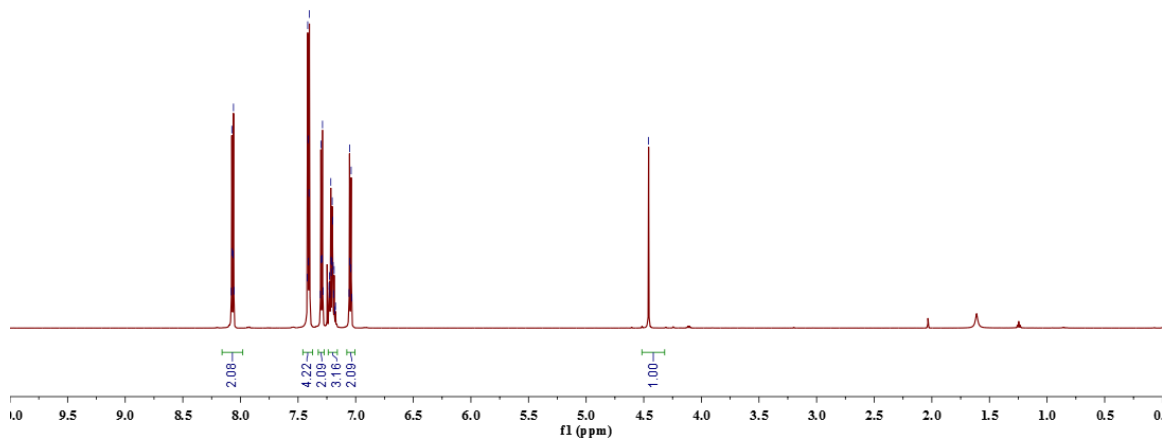

zzf180921-lc  
single pulse decoupled NOE

188.86

136.55  
128.34  
127.40  
127.26  
125.10  
124.77  
124.53  
124.47  
123.46  
118.39

67.27

58.74

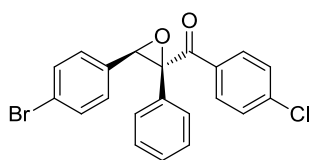

1j (rac-)

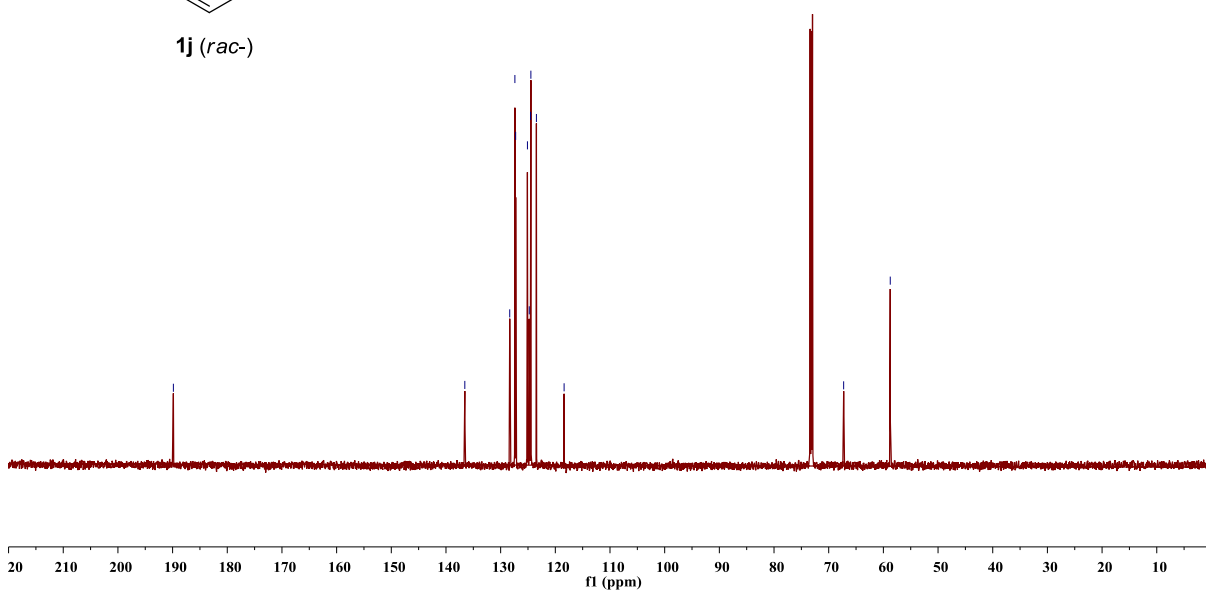

zzf180829-2H  
single\_pulse

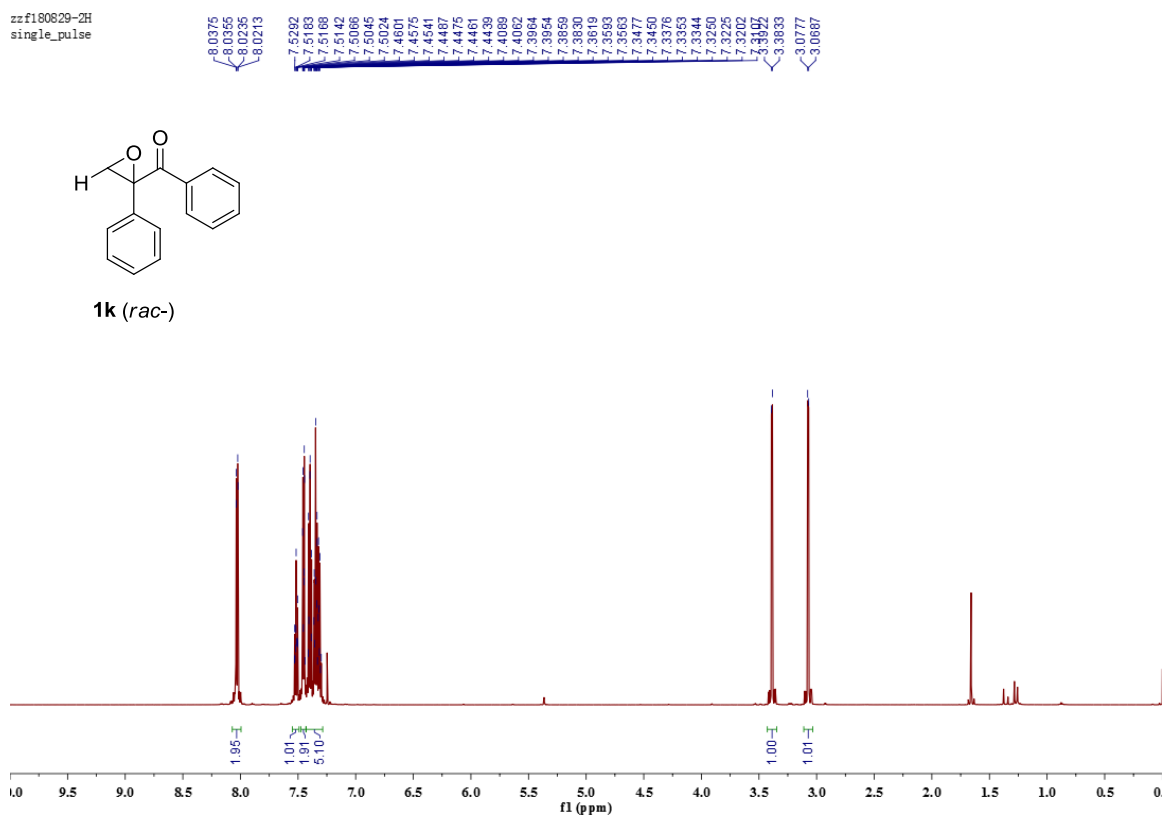

zzf180829-2H  
single pulse decoupled gated NOE

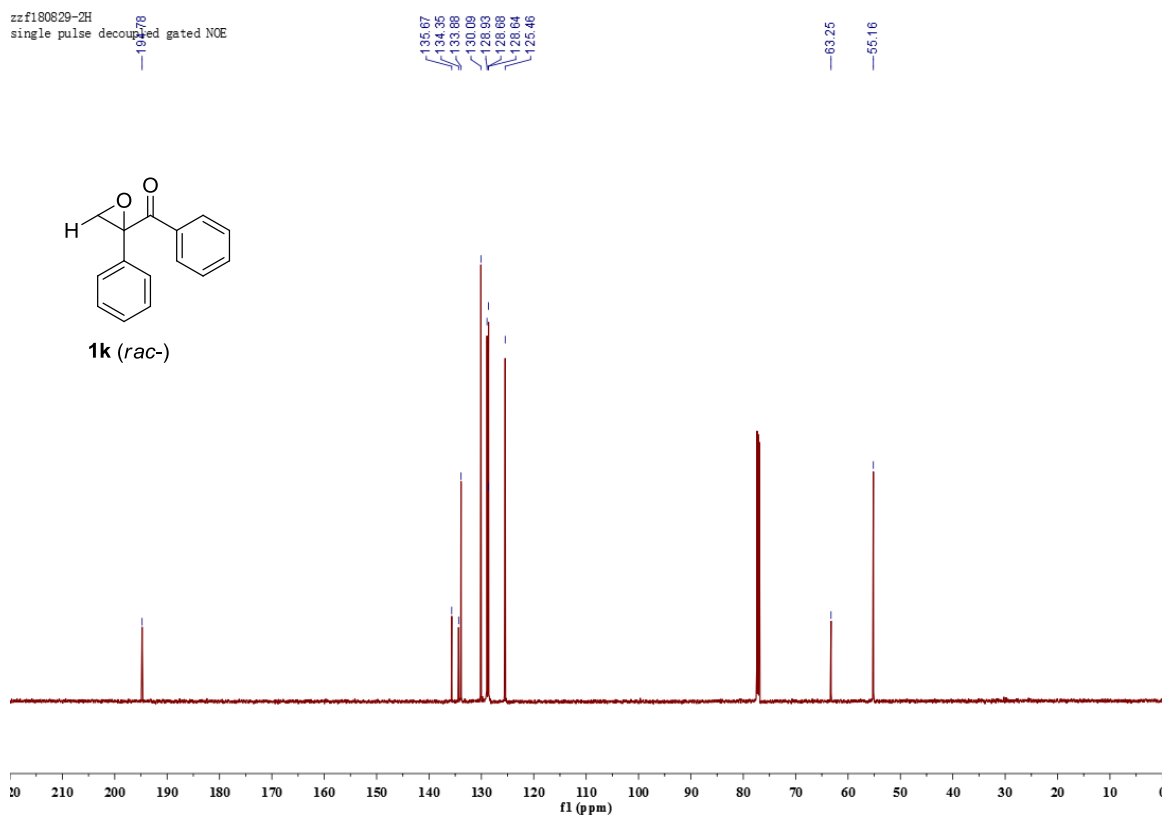

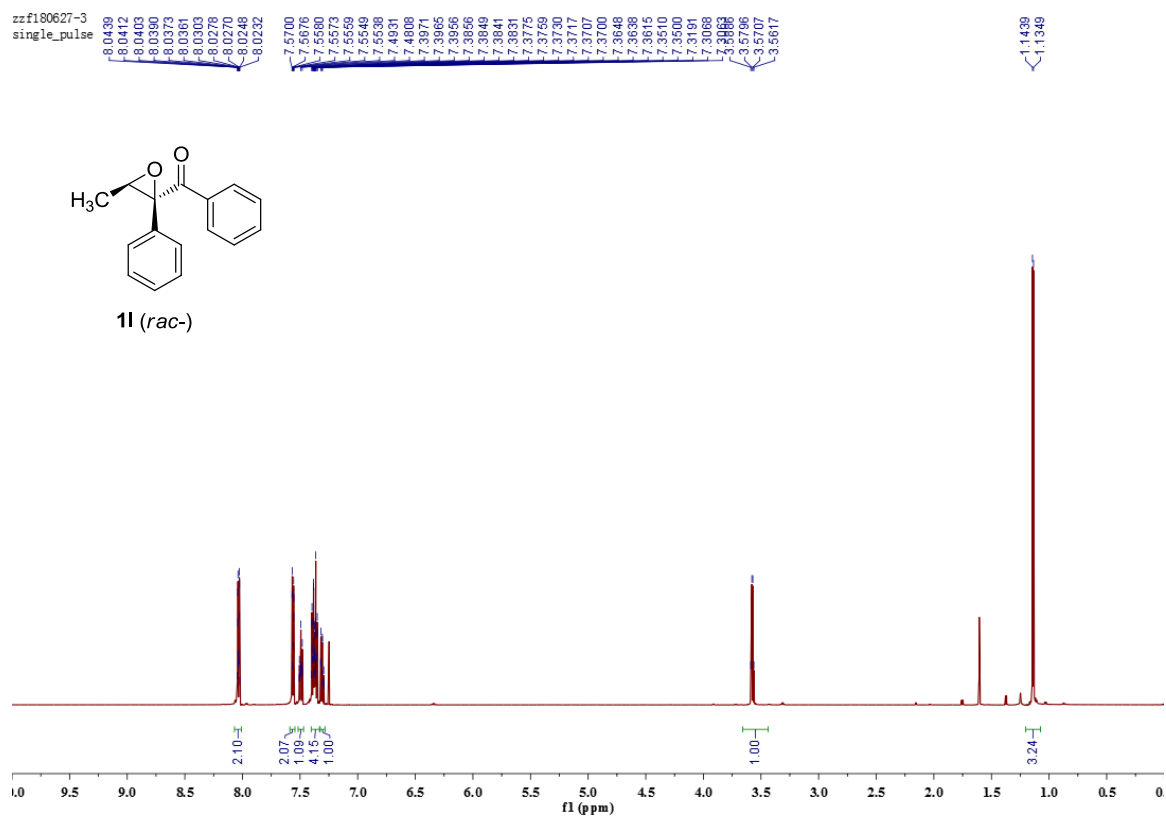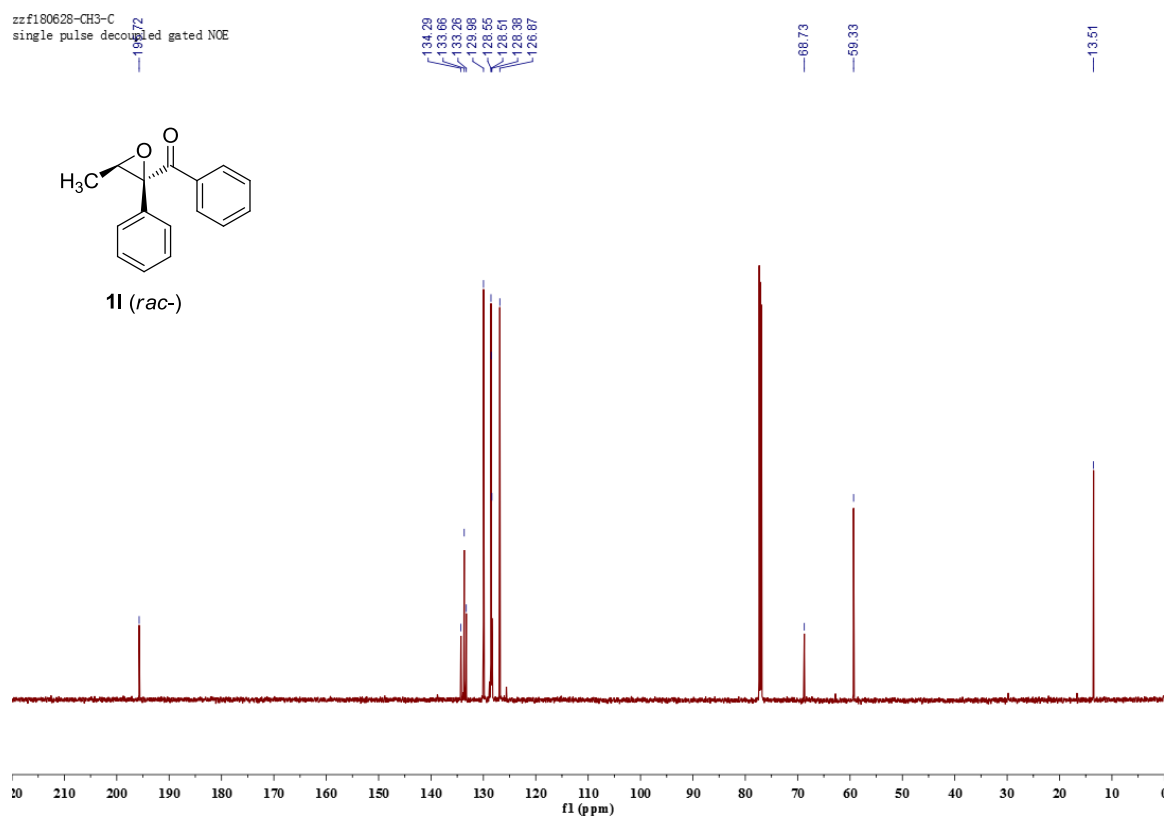

zzf181012-4-1  
single\_pulse

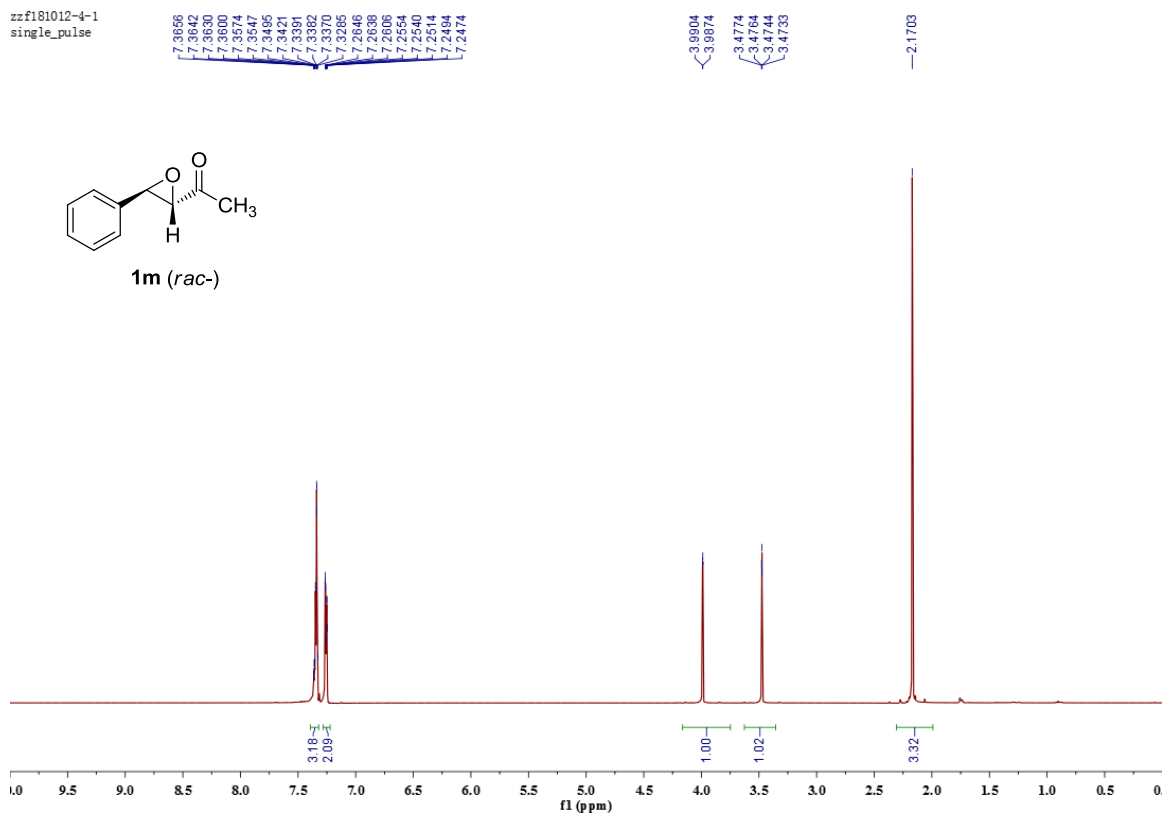

zzf181012-4-1  
single\_pulse decoupled gated NOE

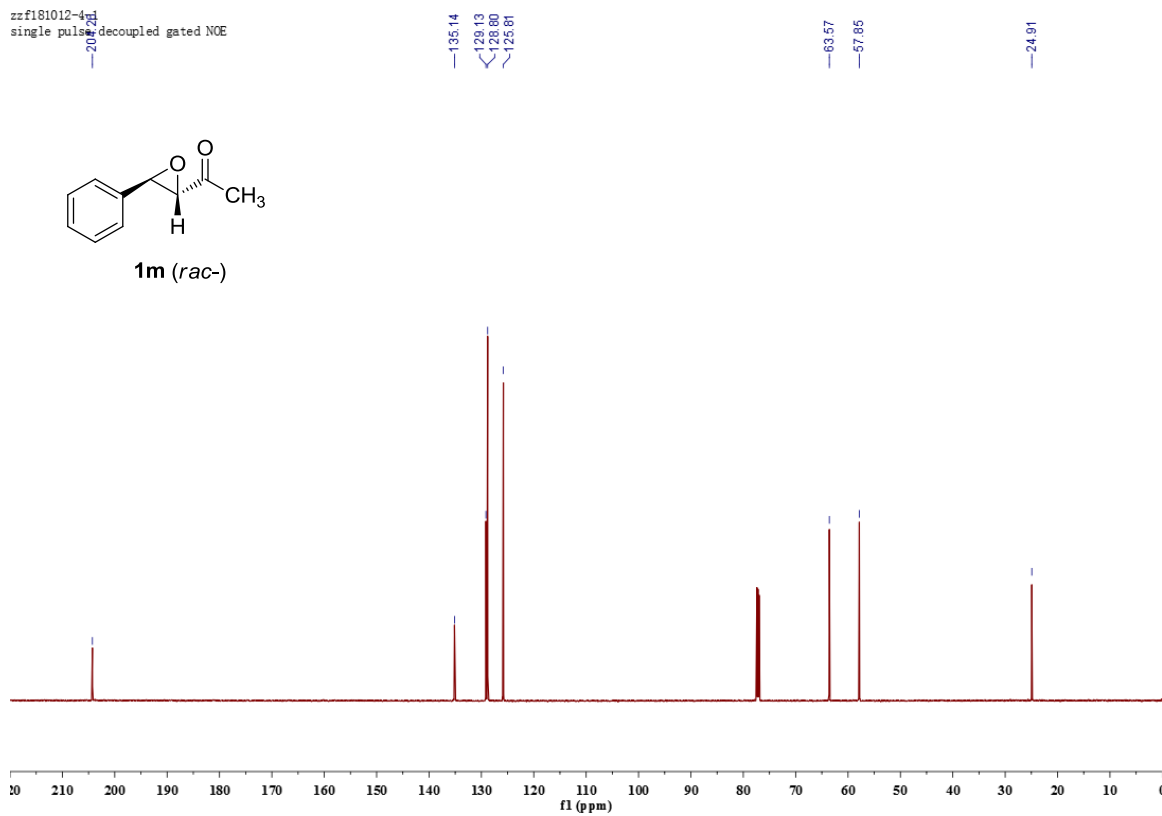

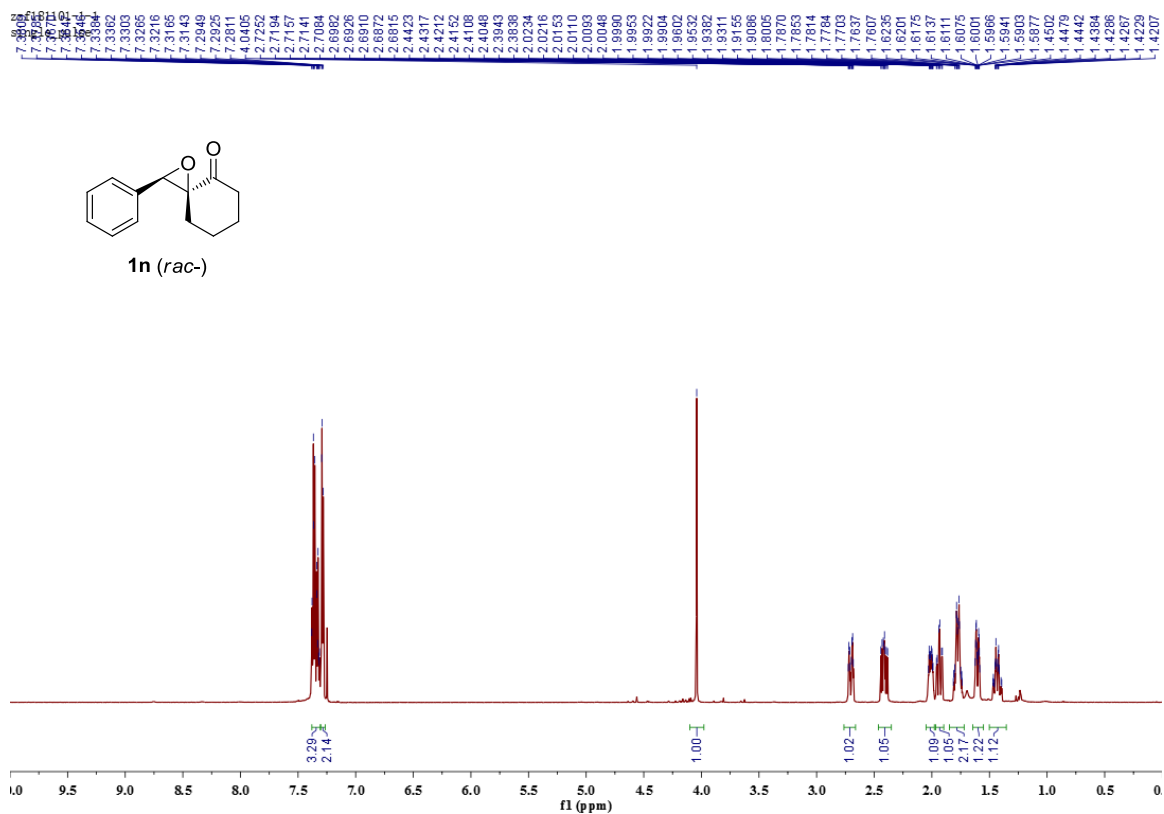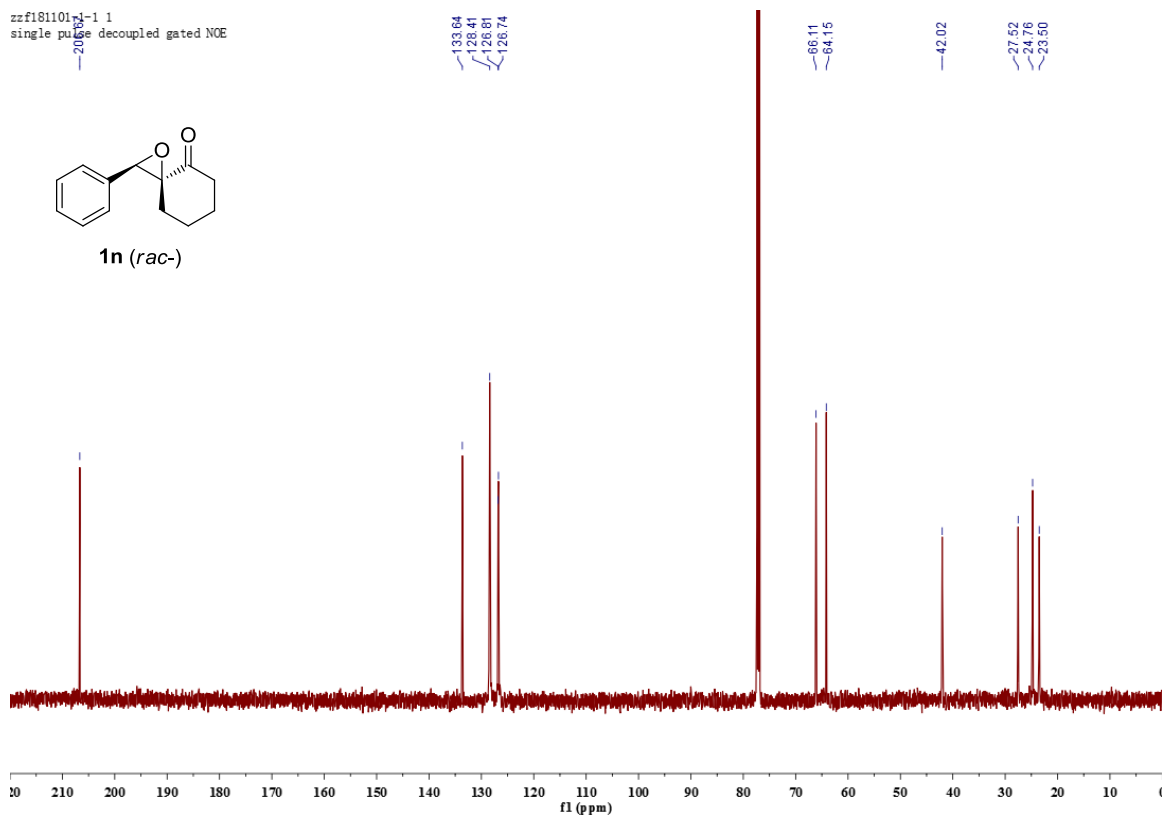

zzf181030-1  
single\_pulse

8.0589  
8.0561  
8.0541  
8.0525  
8.0513  
8.0495  
8.0482  
8.0460  
7.6049  
7.5936  
7.5926  
7.5912  
7.5896  
7.5874  
7.5802  
7.5001  
7.4974  
7.4876  
7.4867  
7.4848  
7.4744  
7.4240  
7.4134  
7.4119  
7.4102  
7.4033  
7.4001  
7.3981  
7.3965  
7.3811  
7.3767  
7.3702  
7.3694  
7.3680  
7.3670  
7.3563  
1.4327

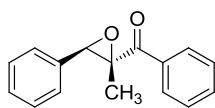

**1a** (*rac*-)

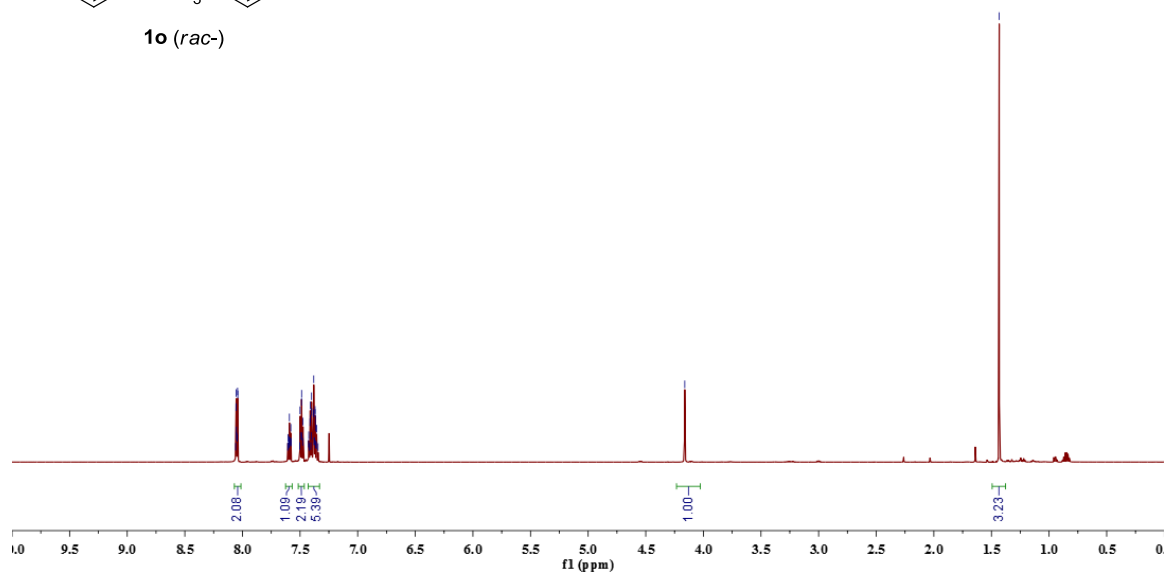

zzf181031-1-  
single pulse decoupled gated NOE

134.42  
133.88  
133.60  
129.40  
128.72  
128.50  
128.42  
126.73

66.62  
61.73

14.52

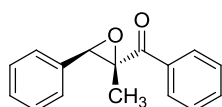

**1a** (*rac*-)

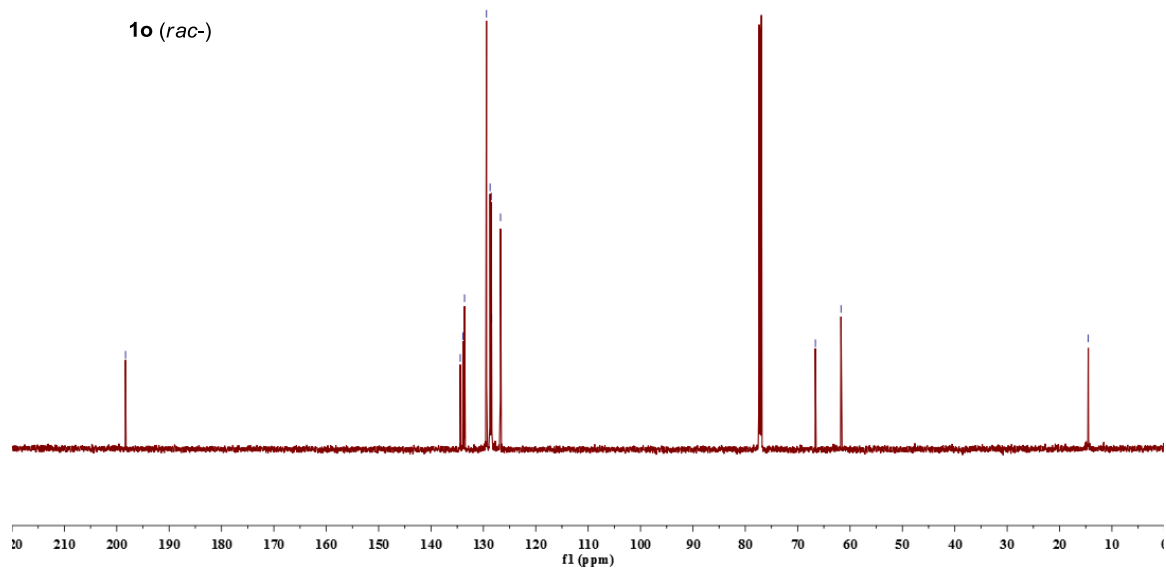



zzf190316-1  
single\_pulse

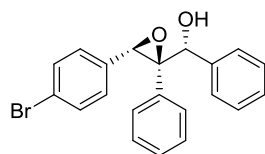

2a

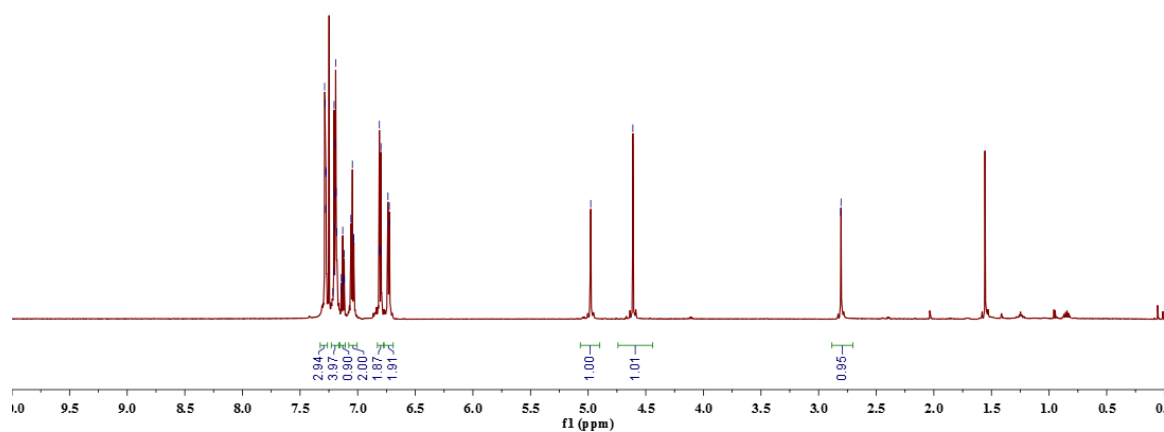

zzf190316-2a-C  
single pulse decoupled gated NOE

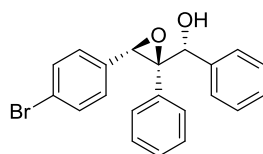

2a

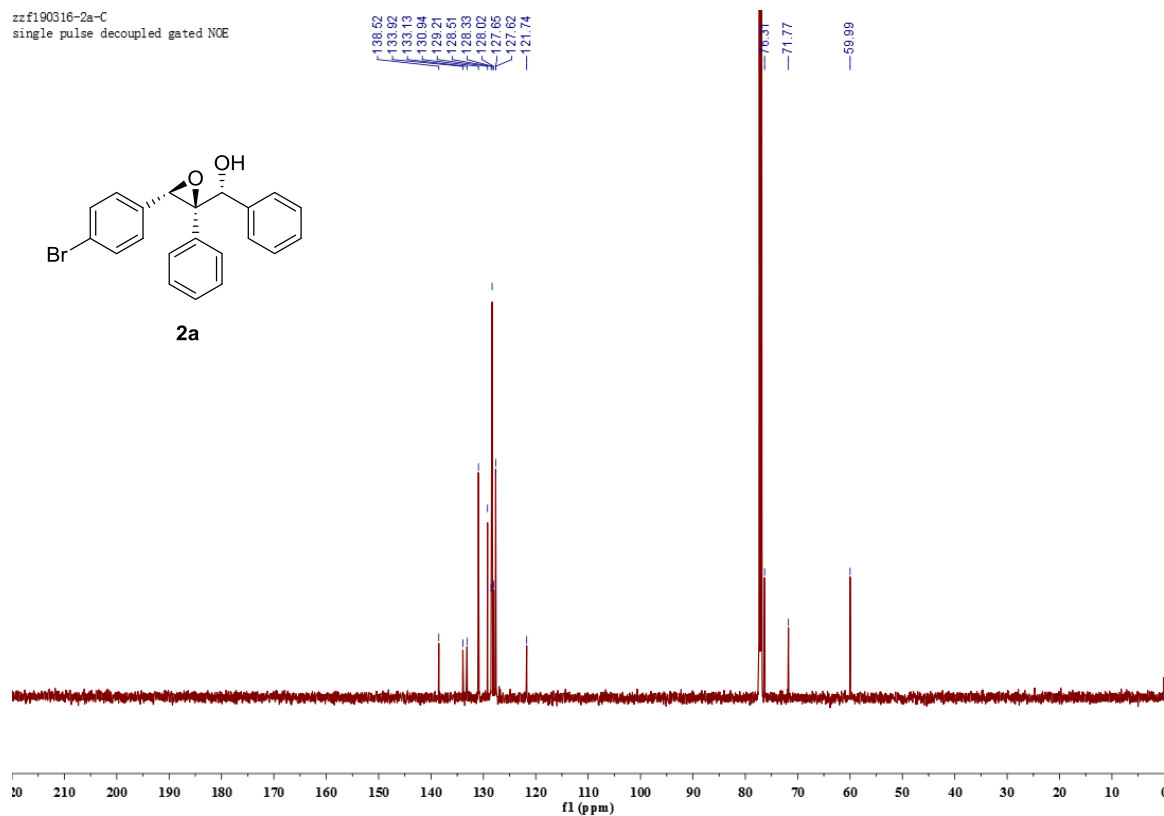

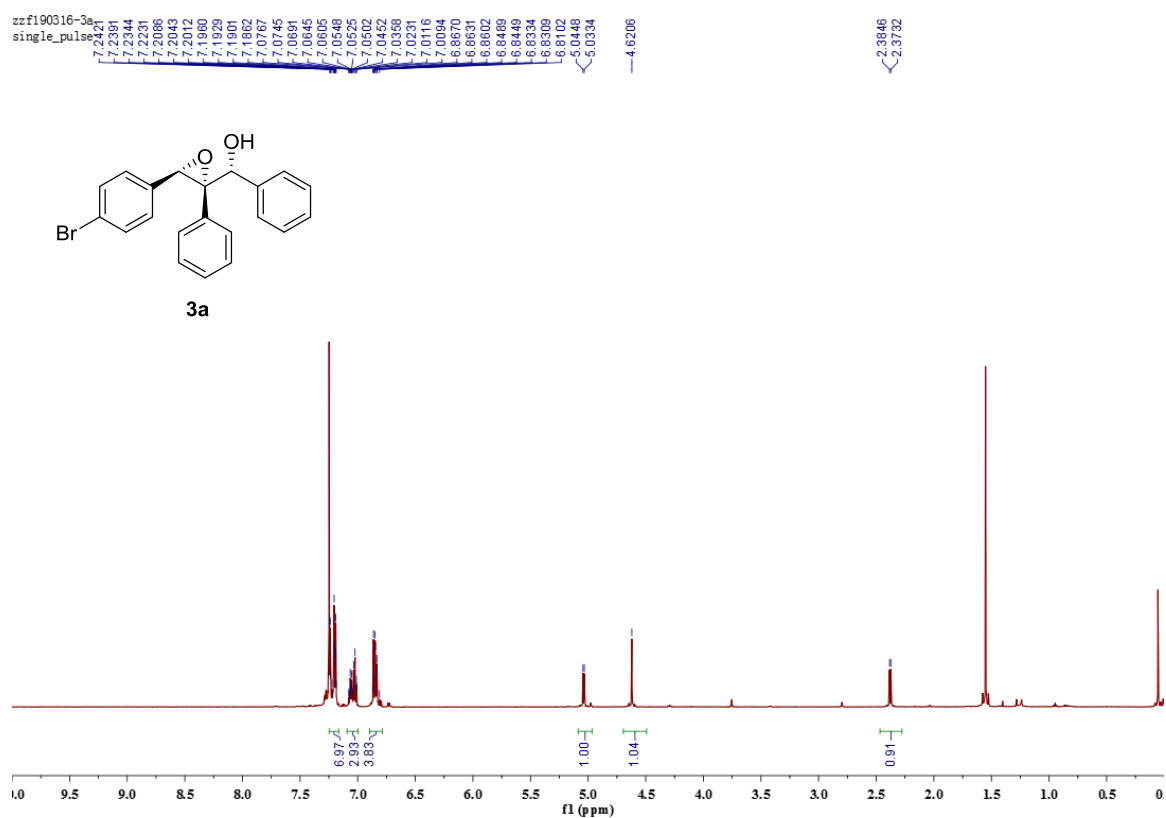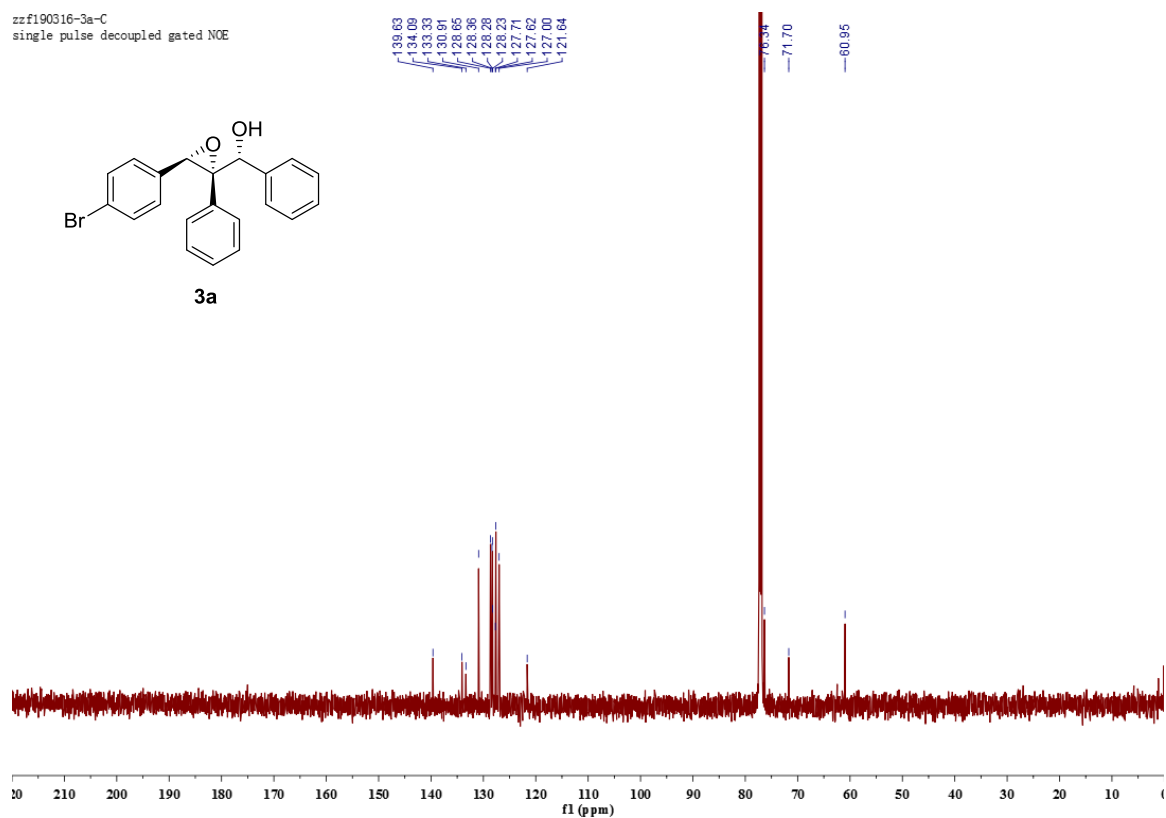

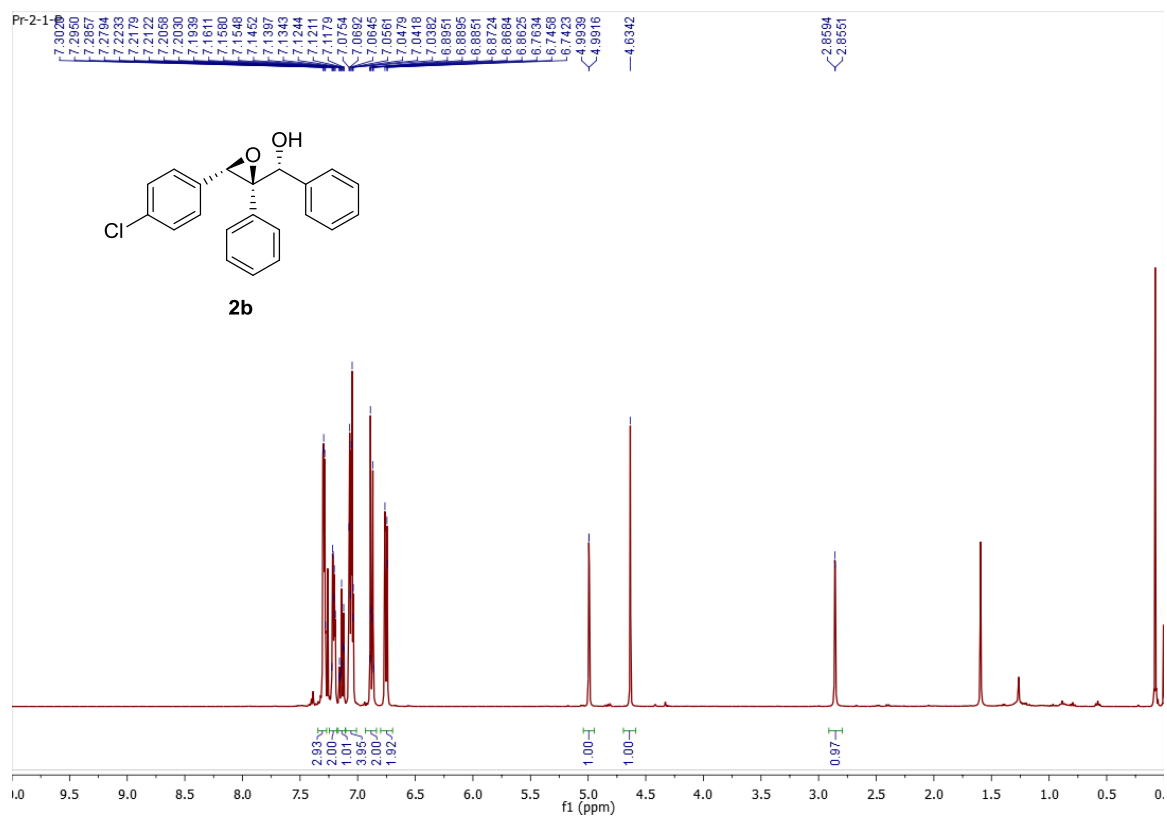

zzf190404-2b-C  
single pulse decoupled gated NOE

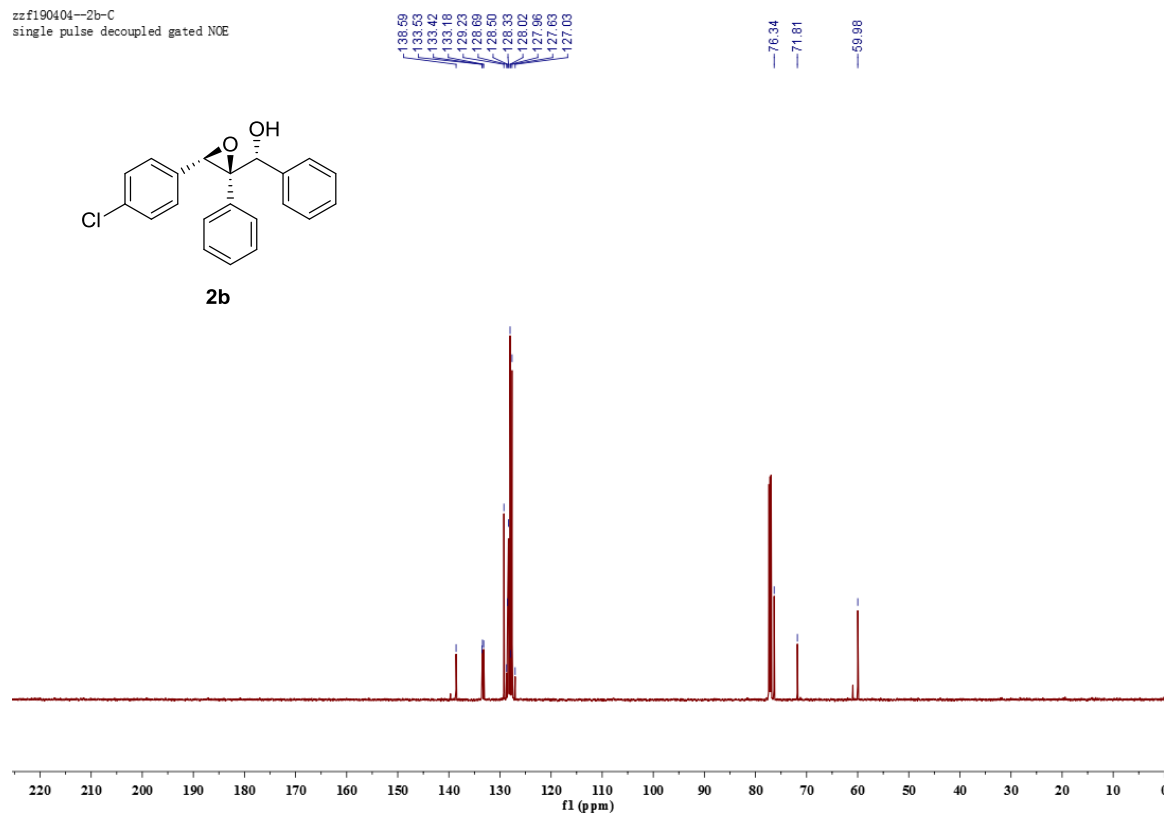

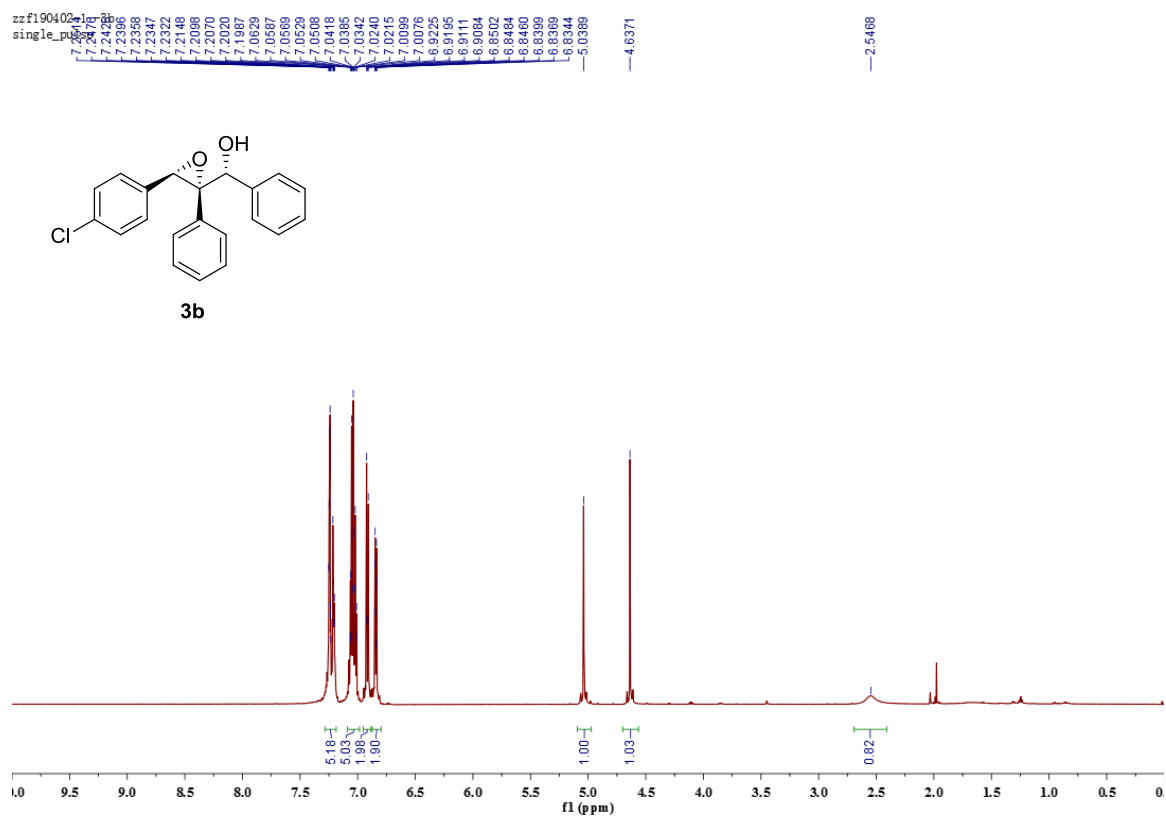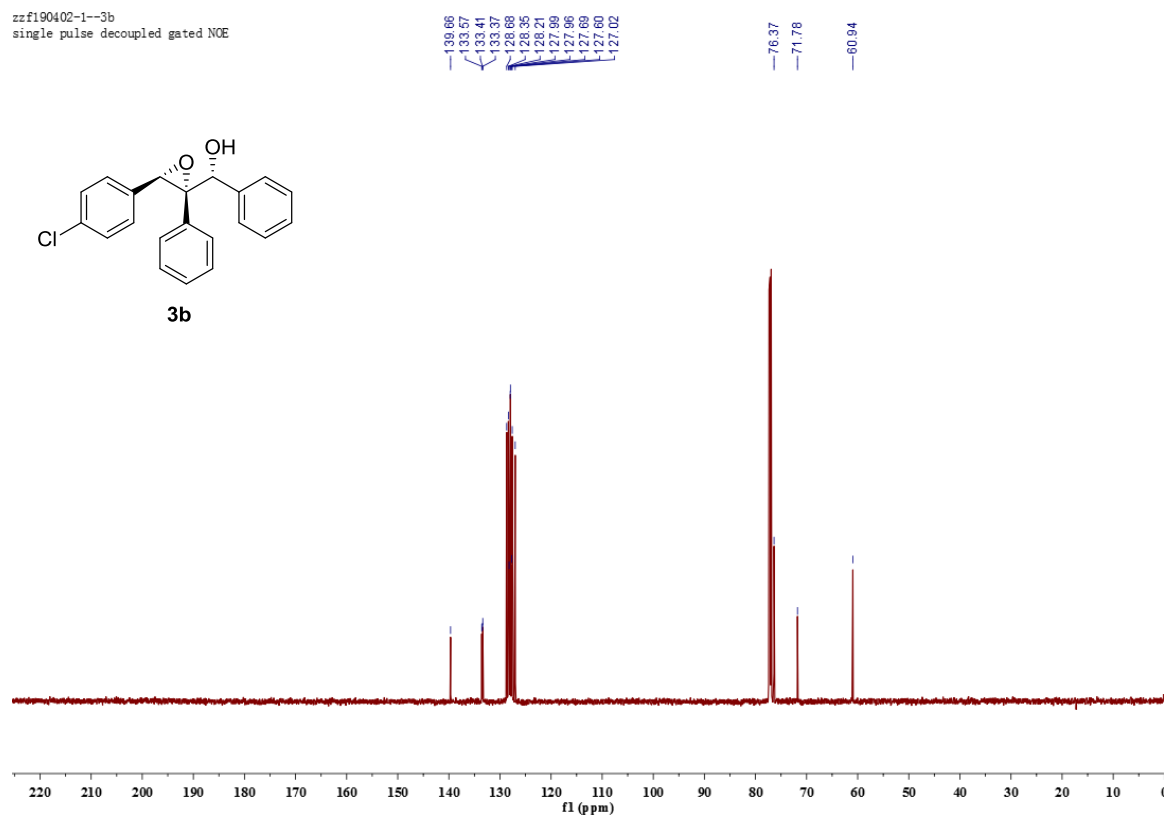

zzf190221-2e  
single\_pulse

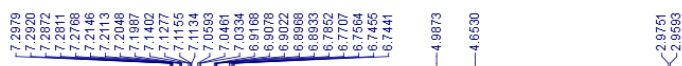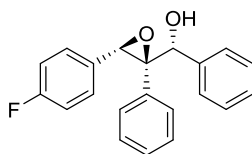

**2c**

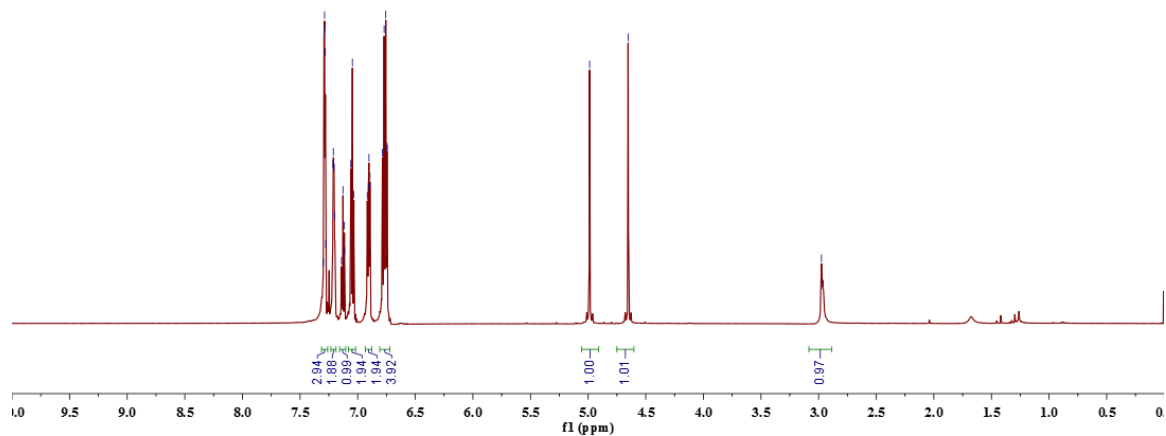

zzf190219-2e  
single pulse decoupled gated NOE

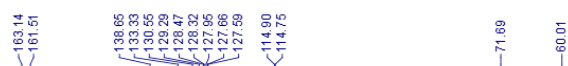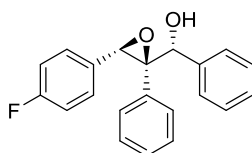

**2c**

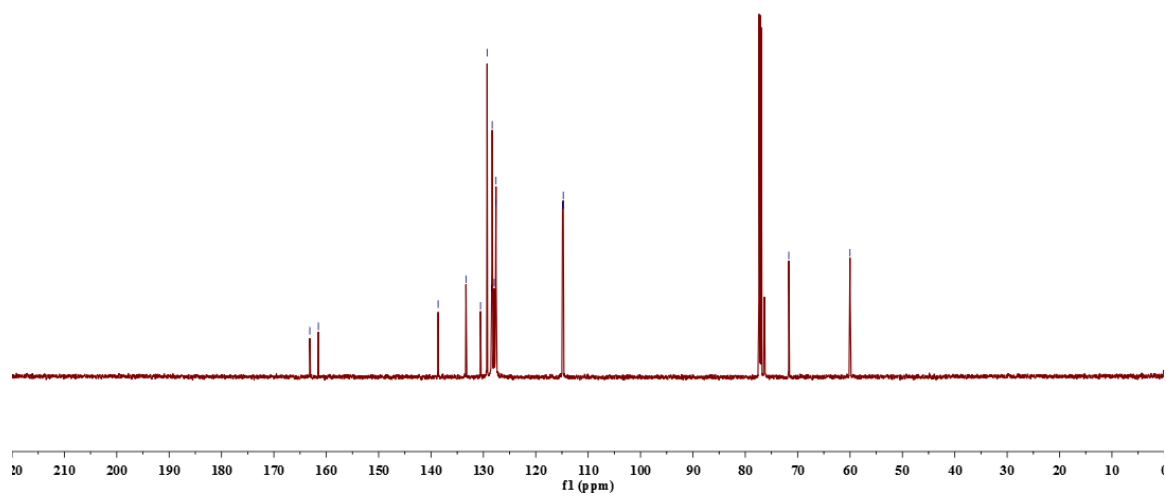

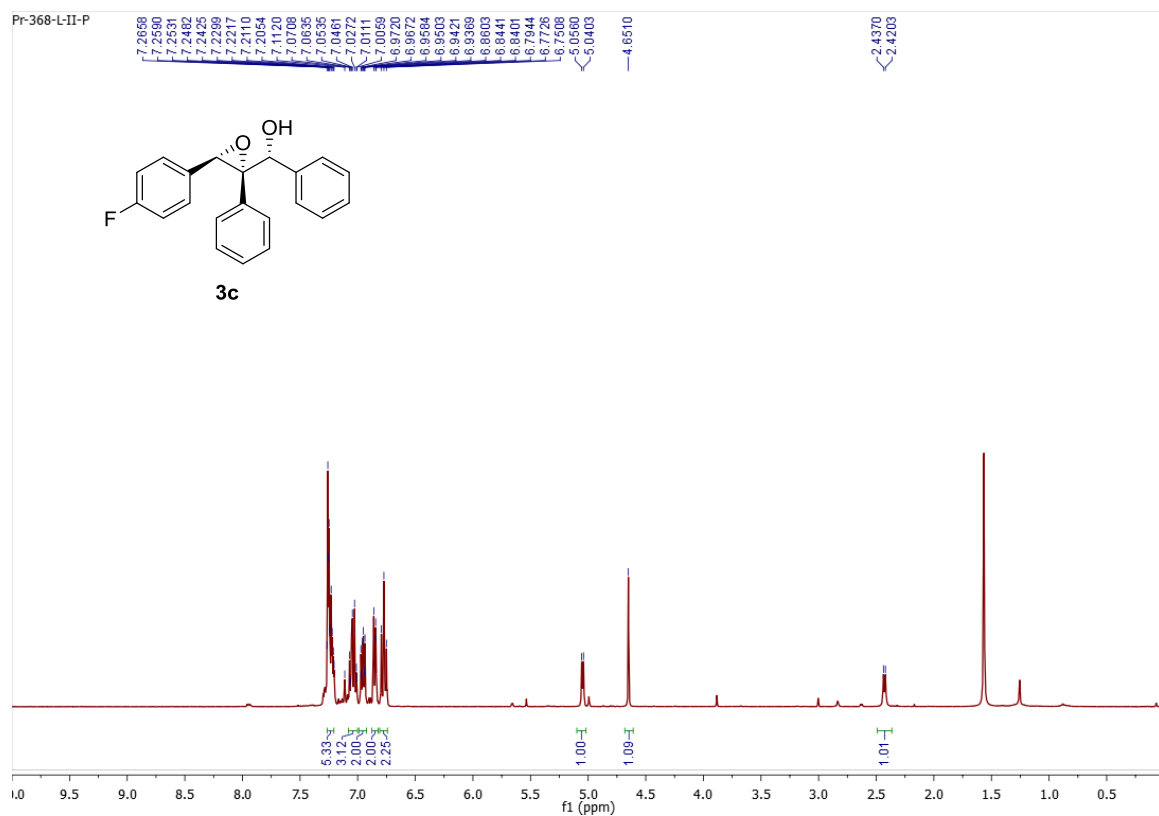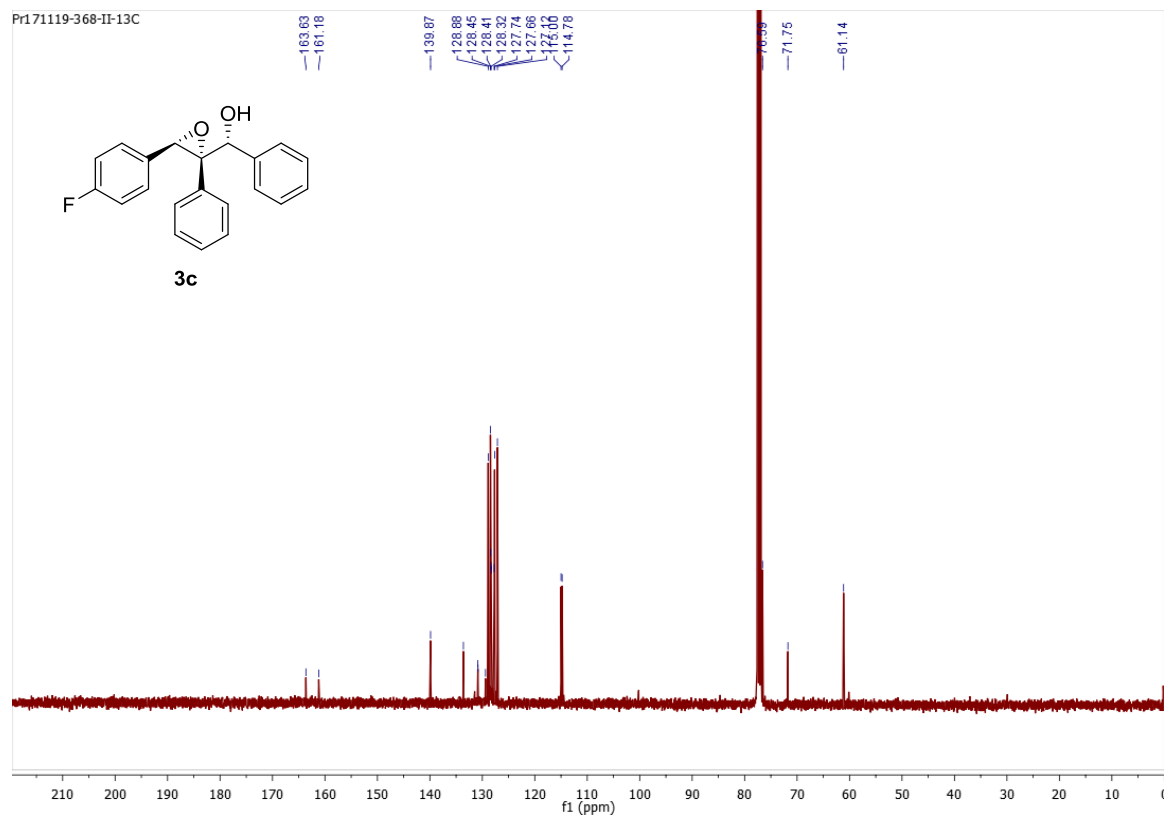

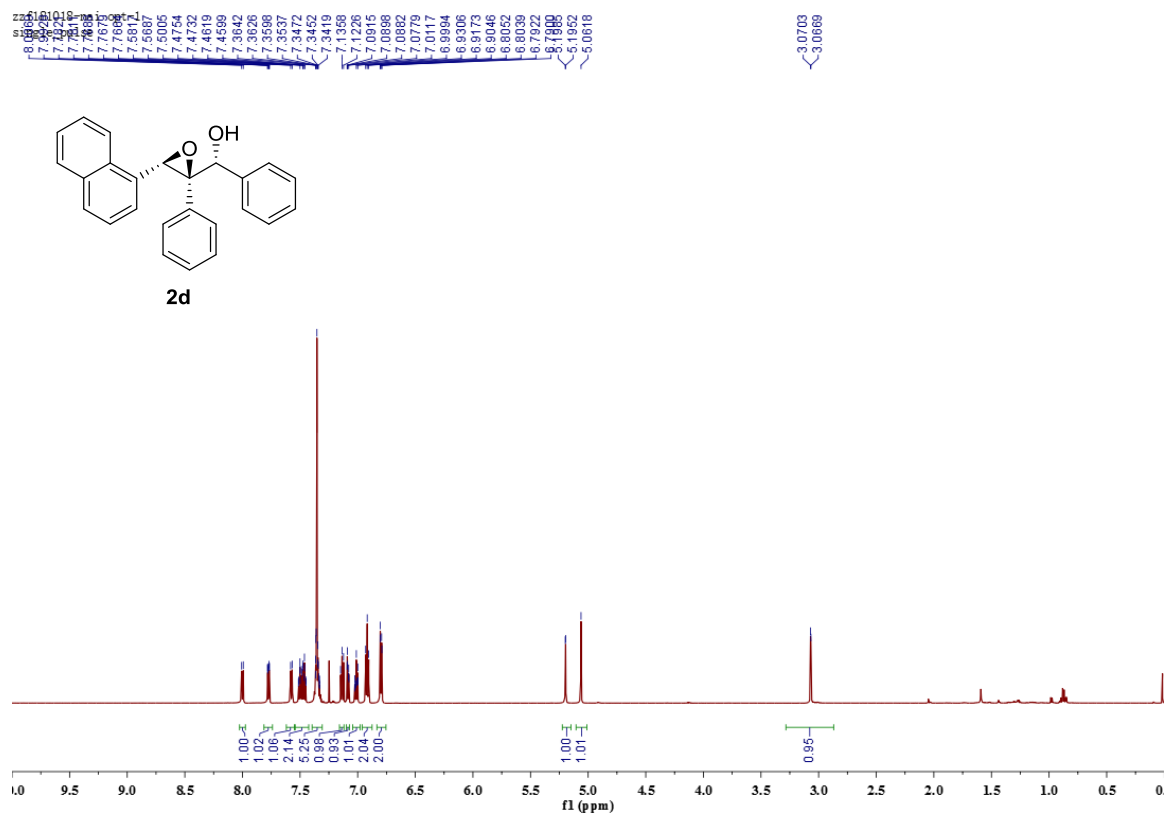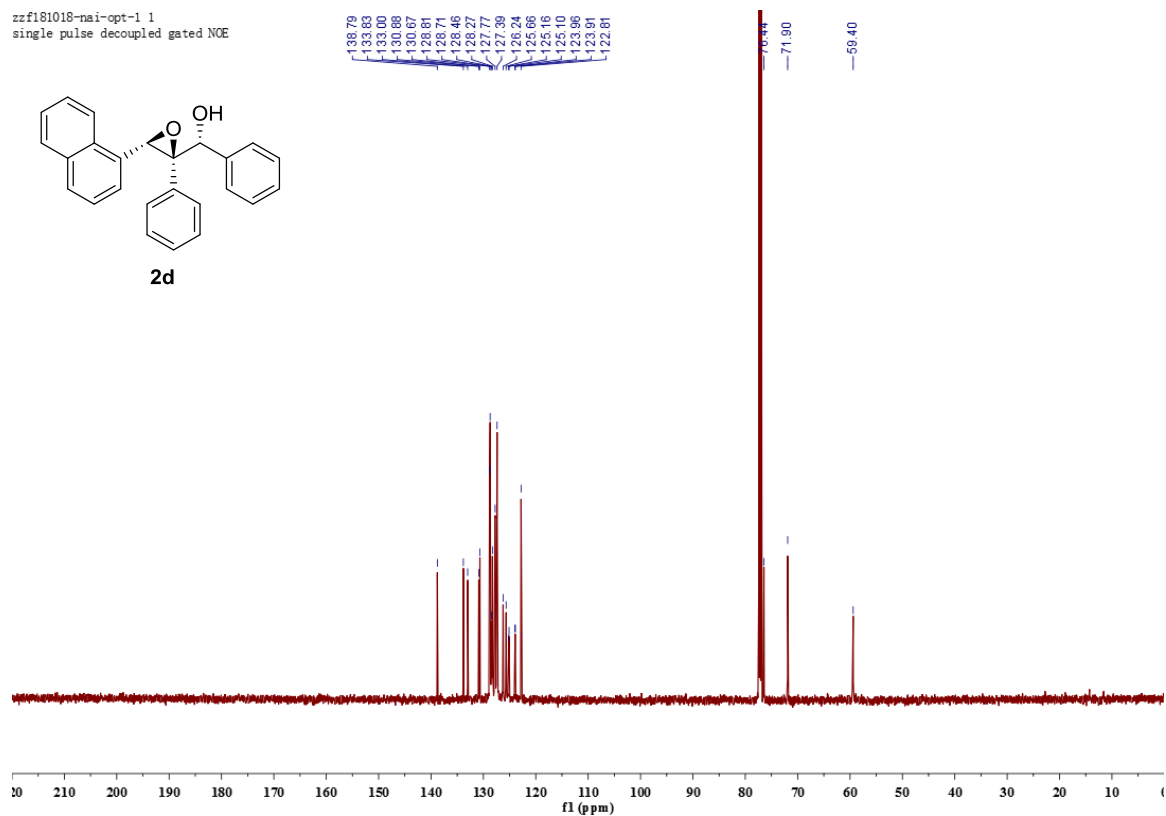

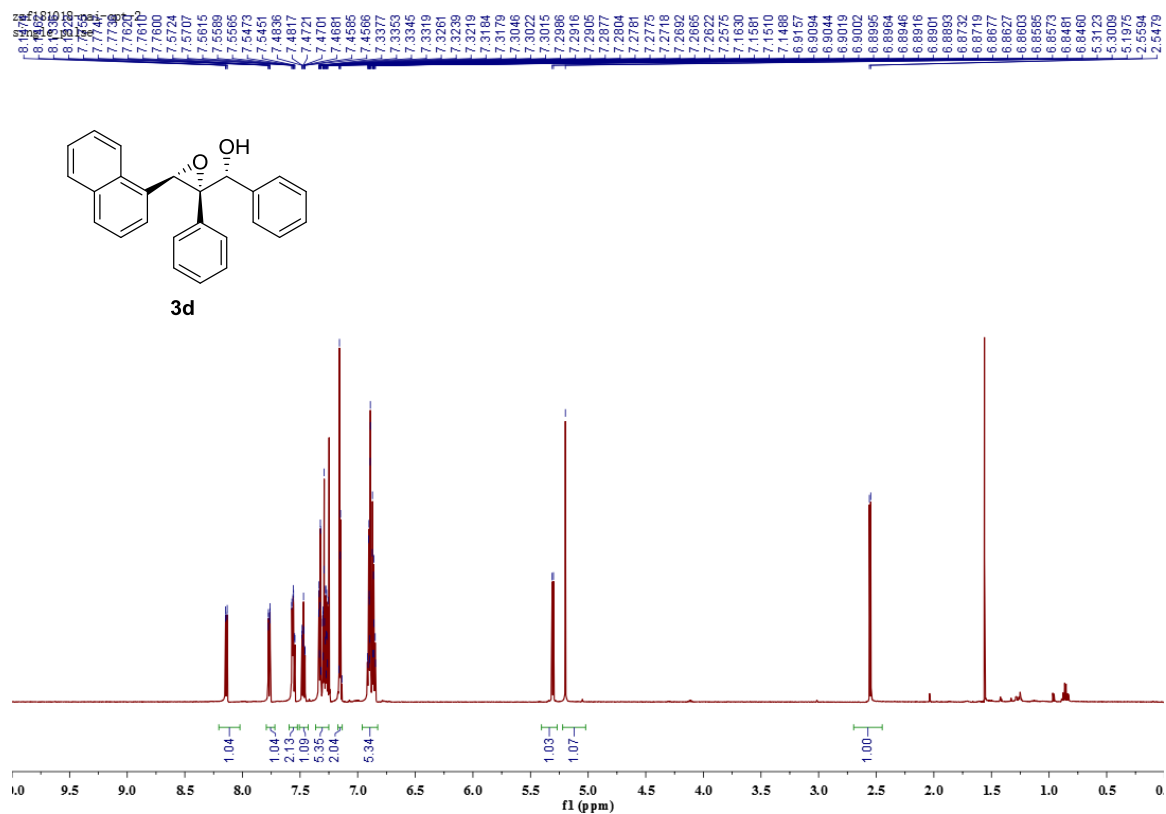

zzf181018-nai-opt-2  
single pulse decoupled gated NOE

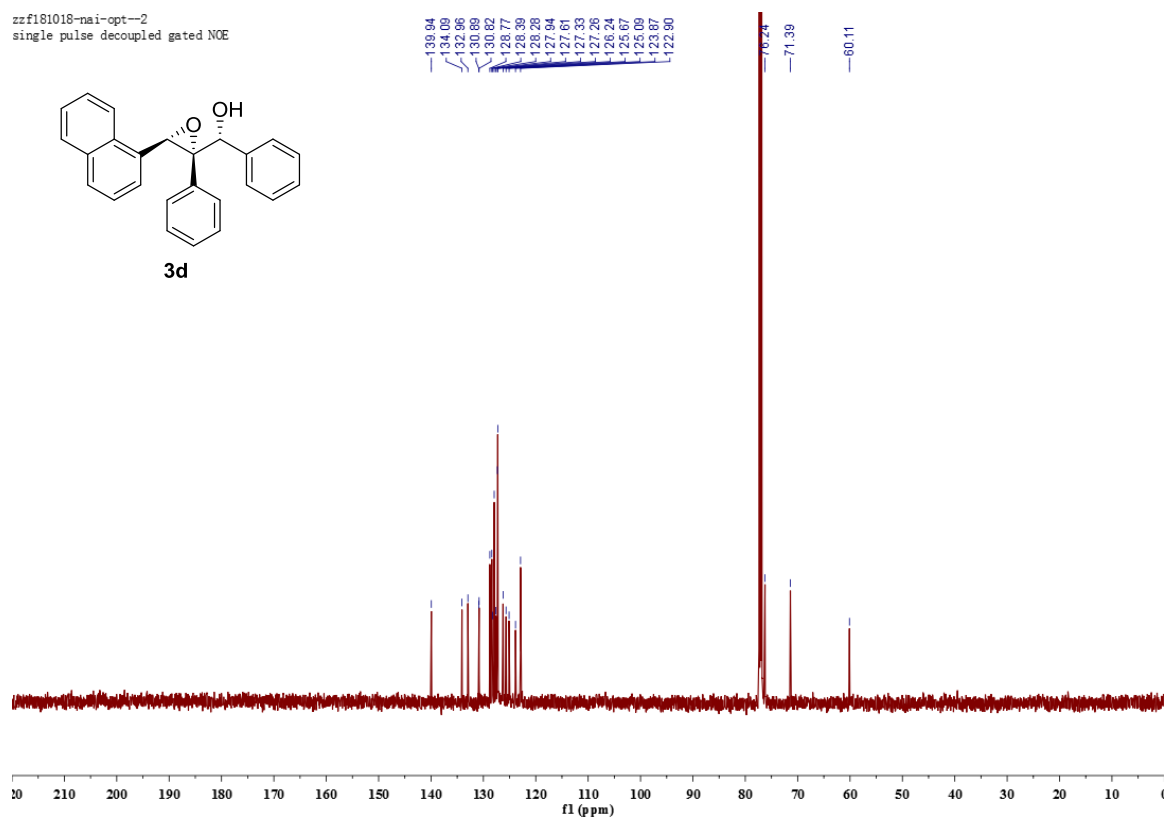



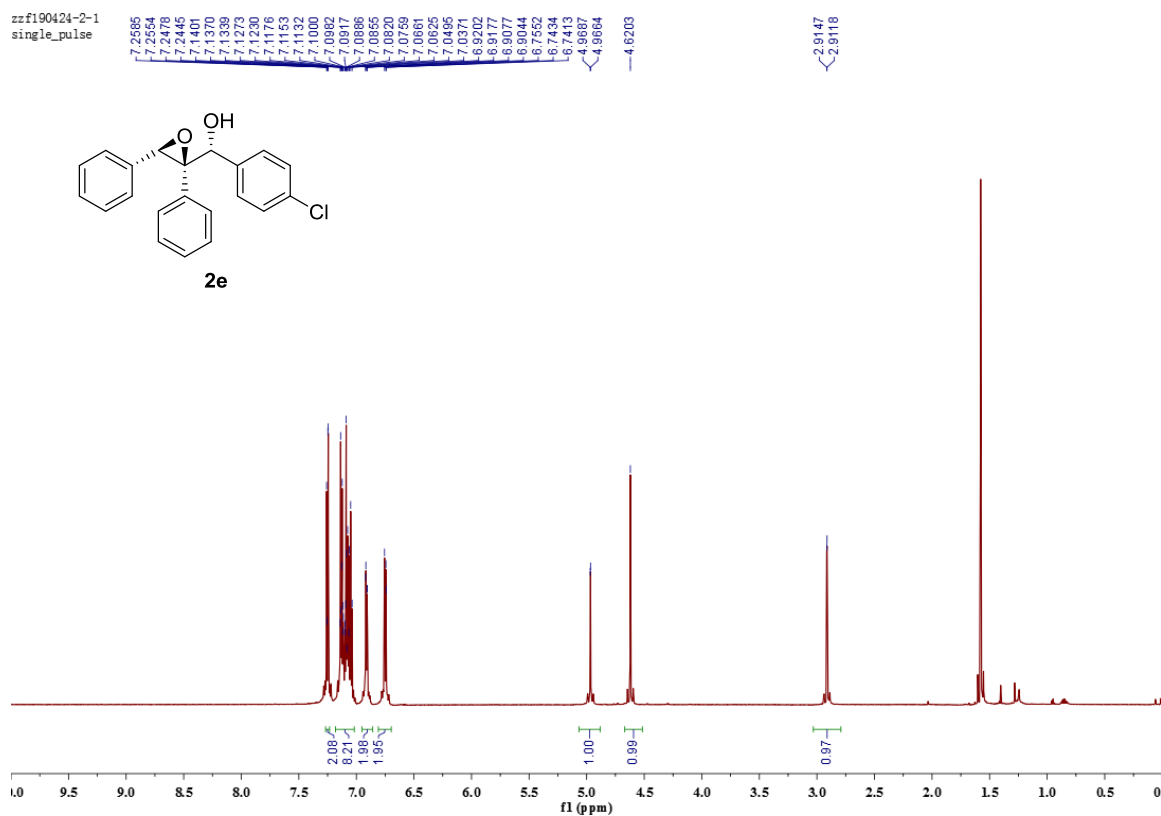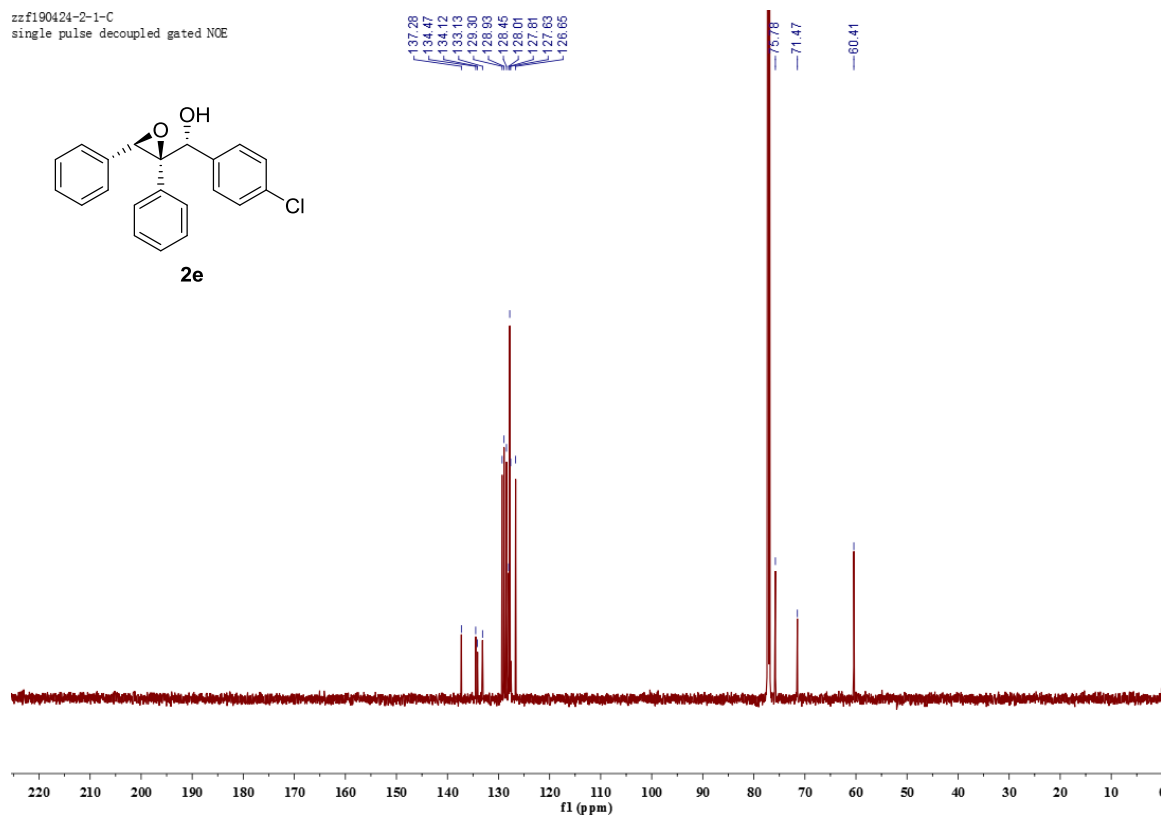

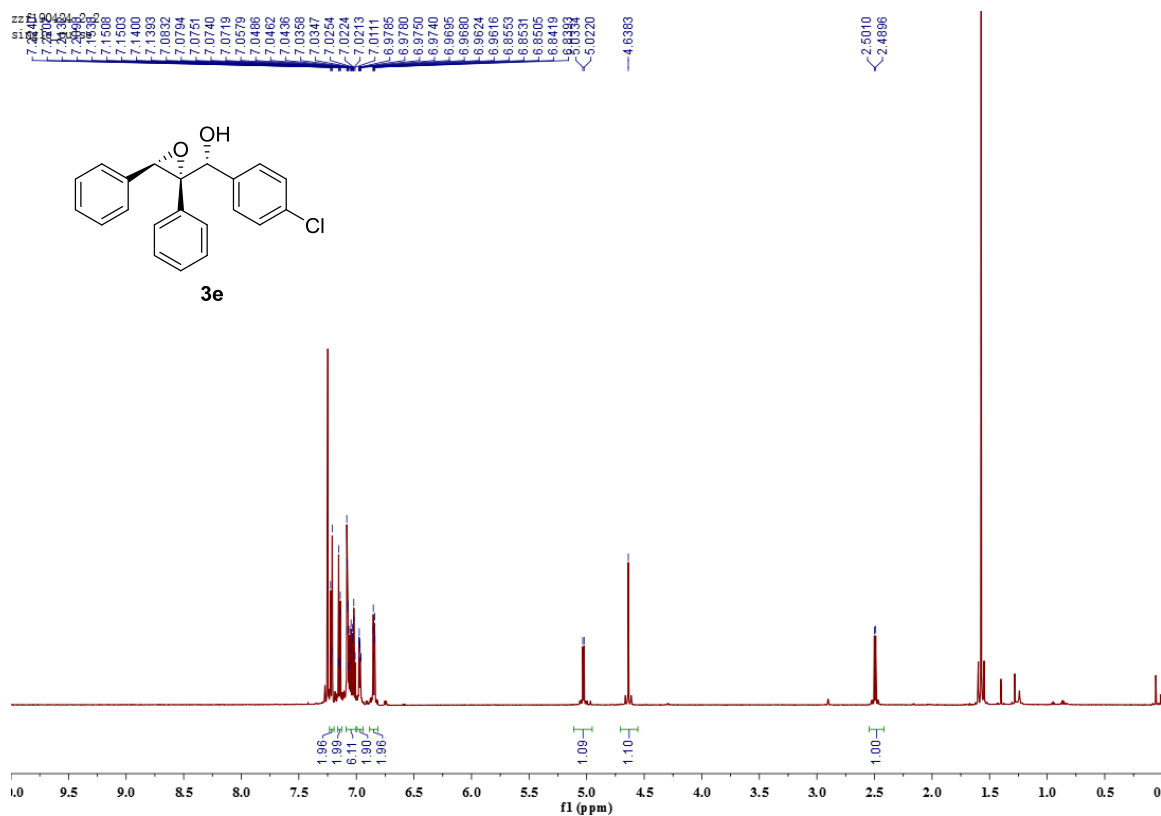

zzf190424-2-2  
single pulse decoupled gated NOE

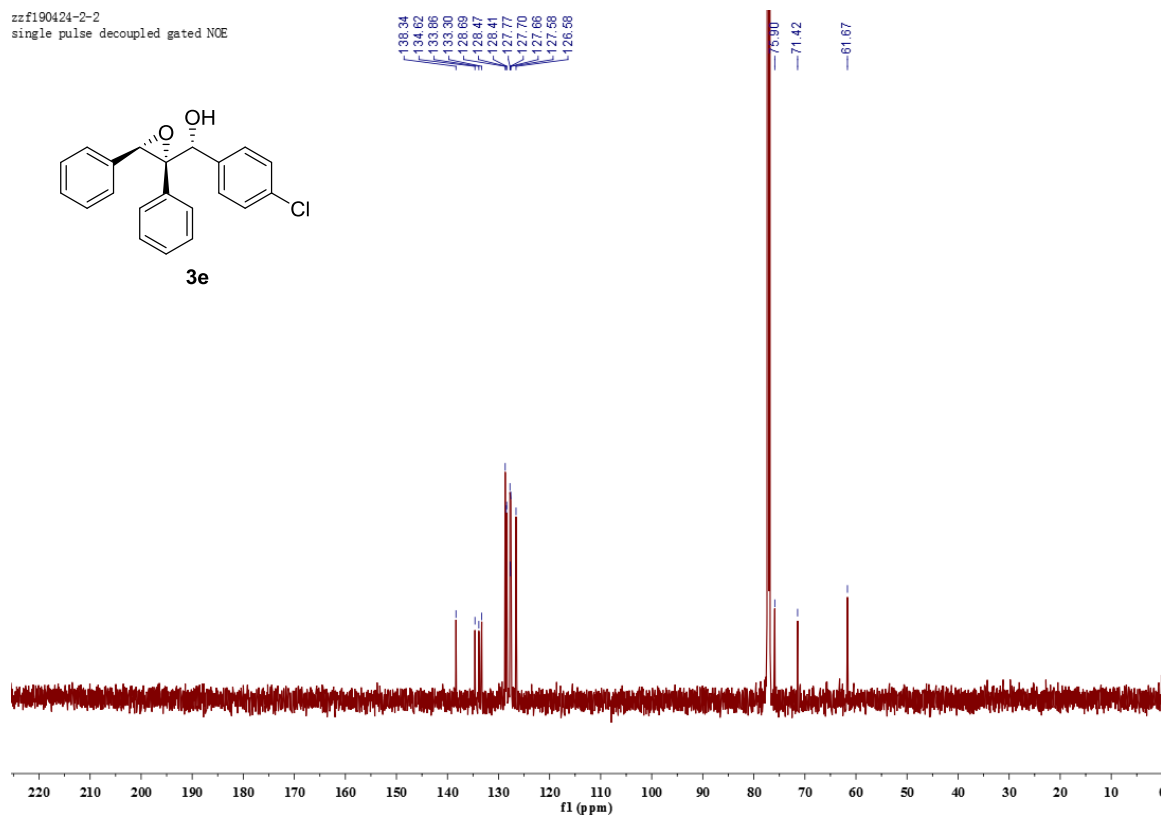

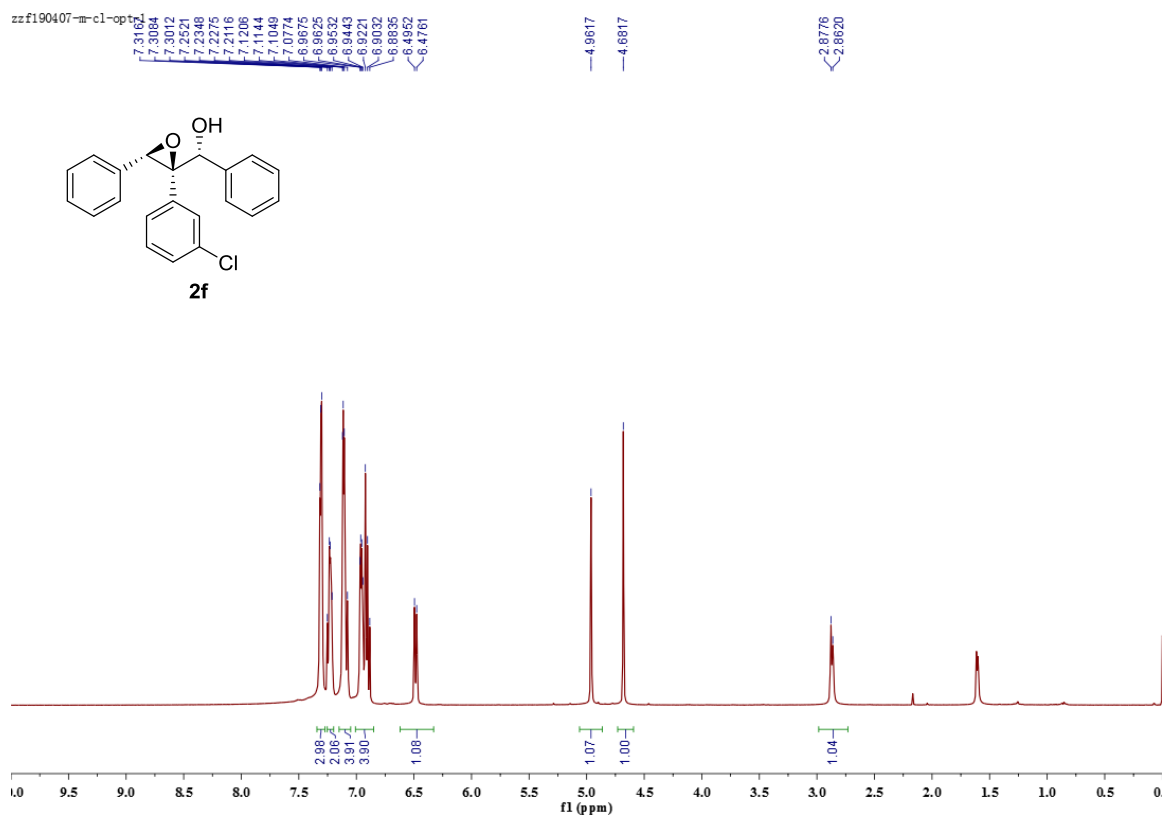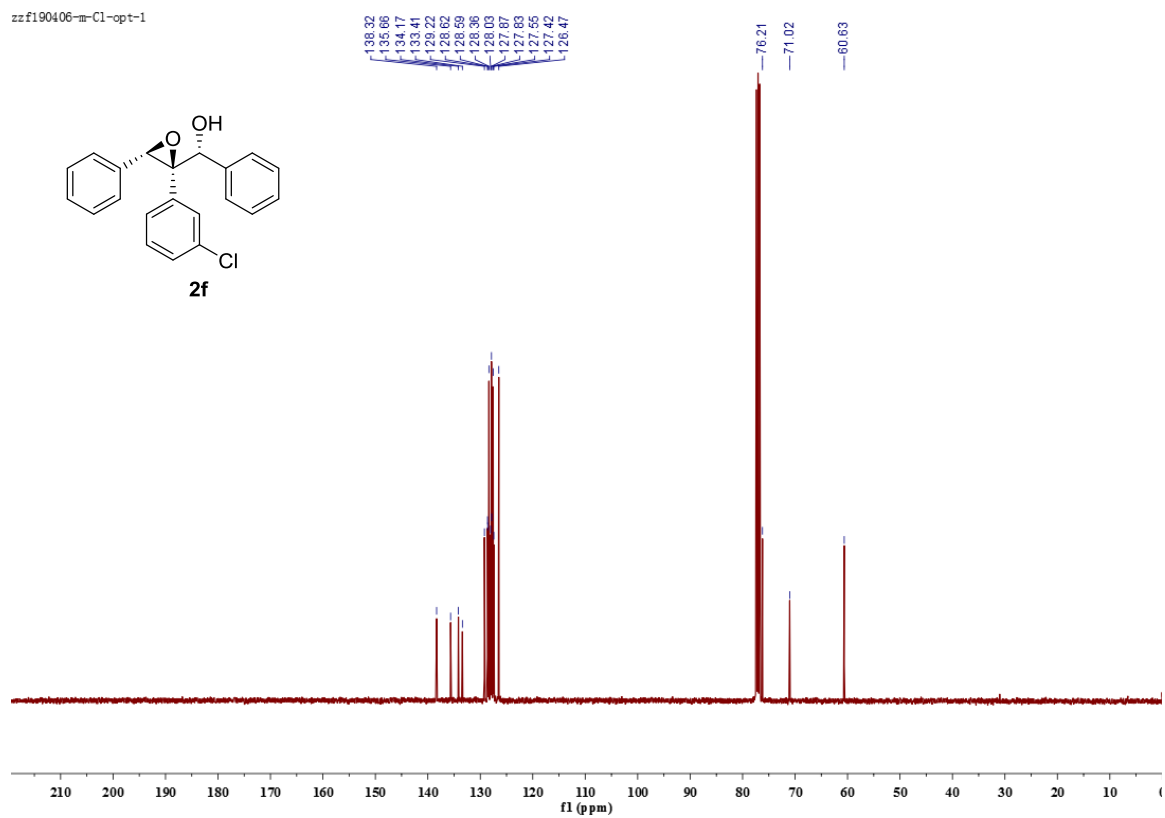

zzf190407-m-cl-opt-2

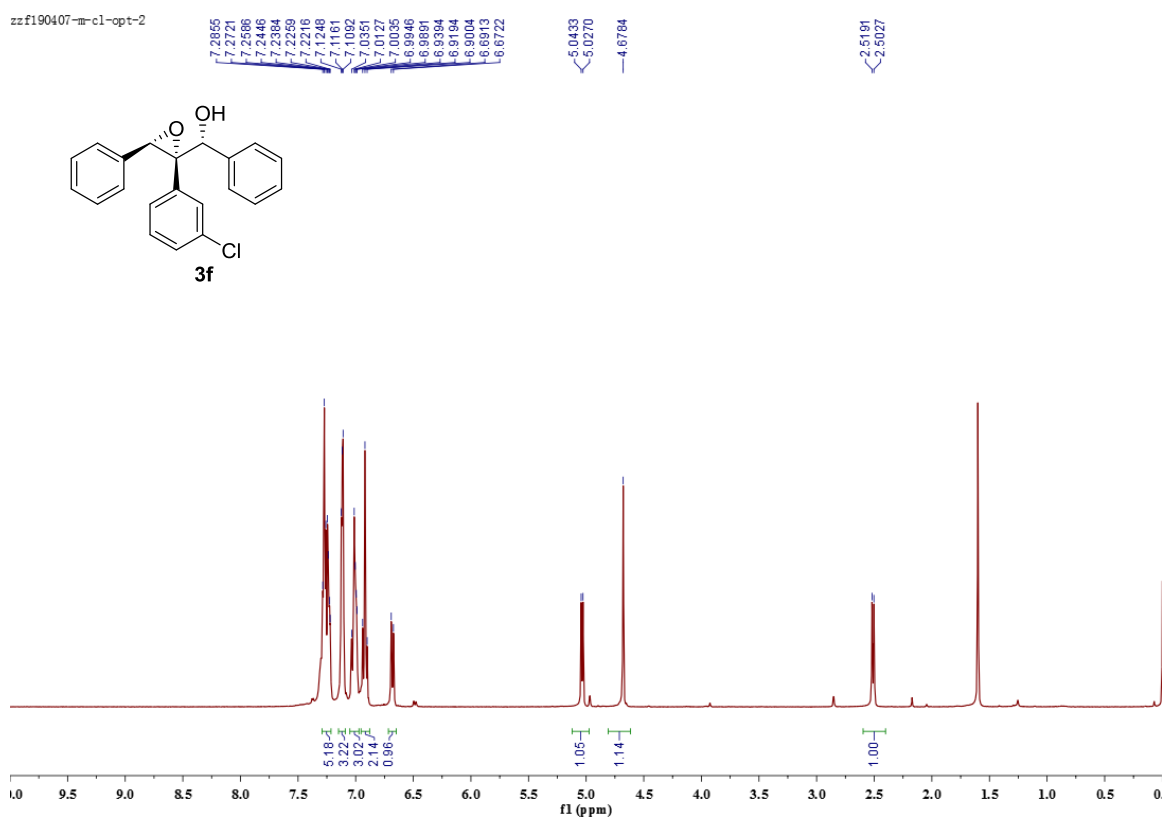

zzf190406-m-cl-opt-2

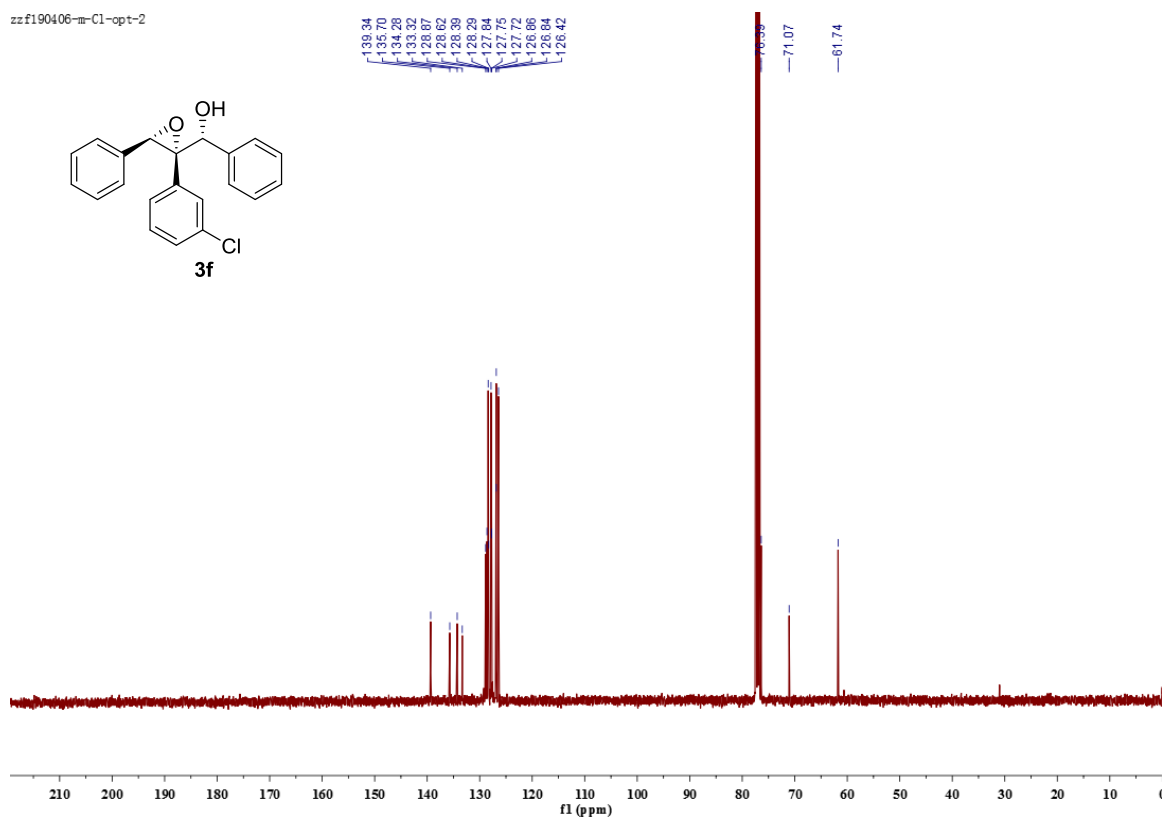

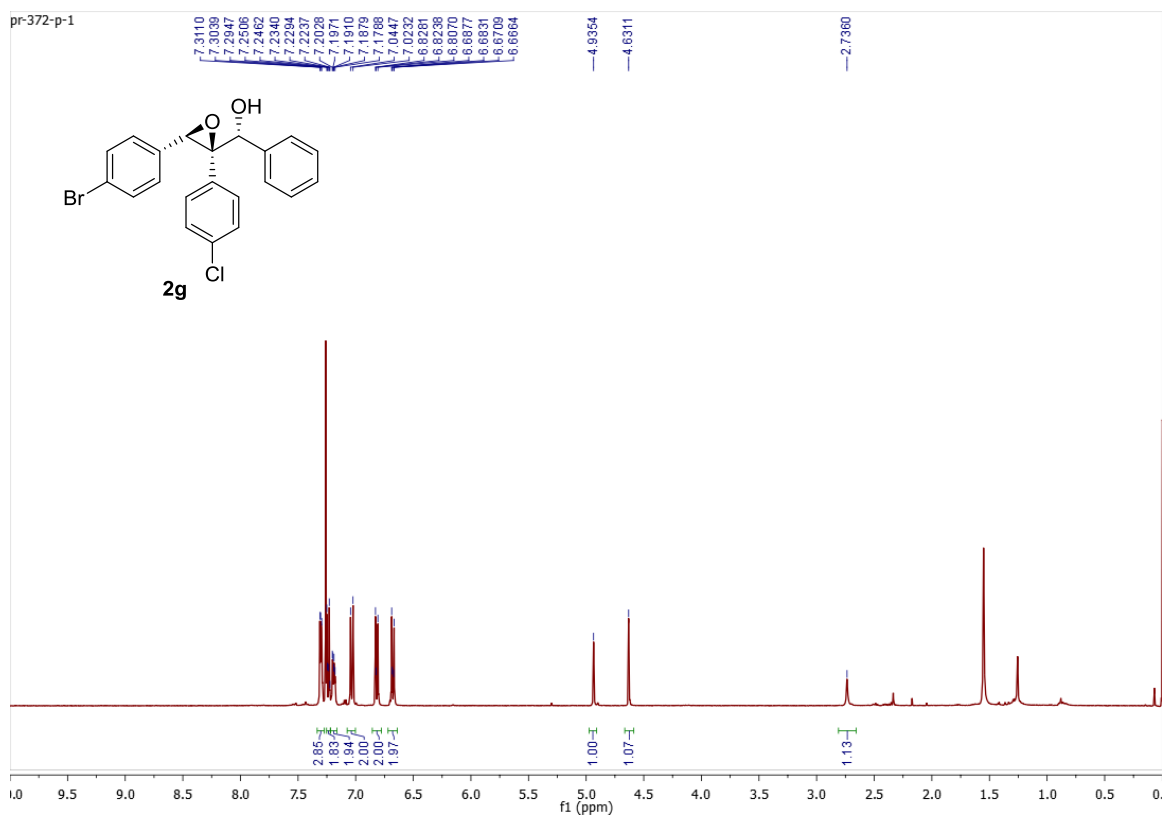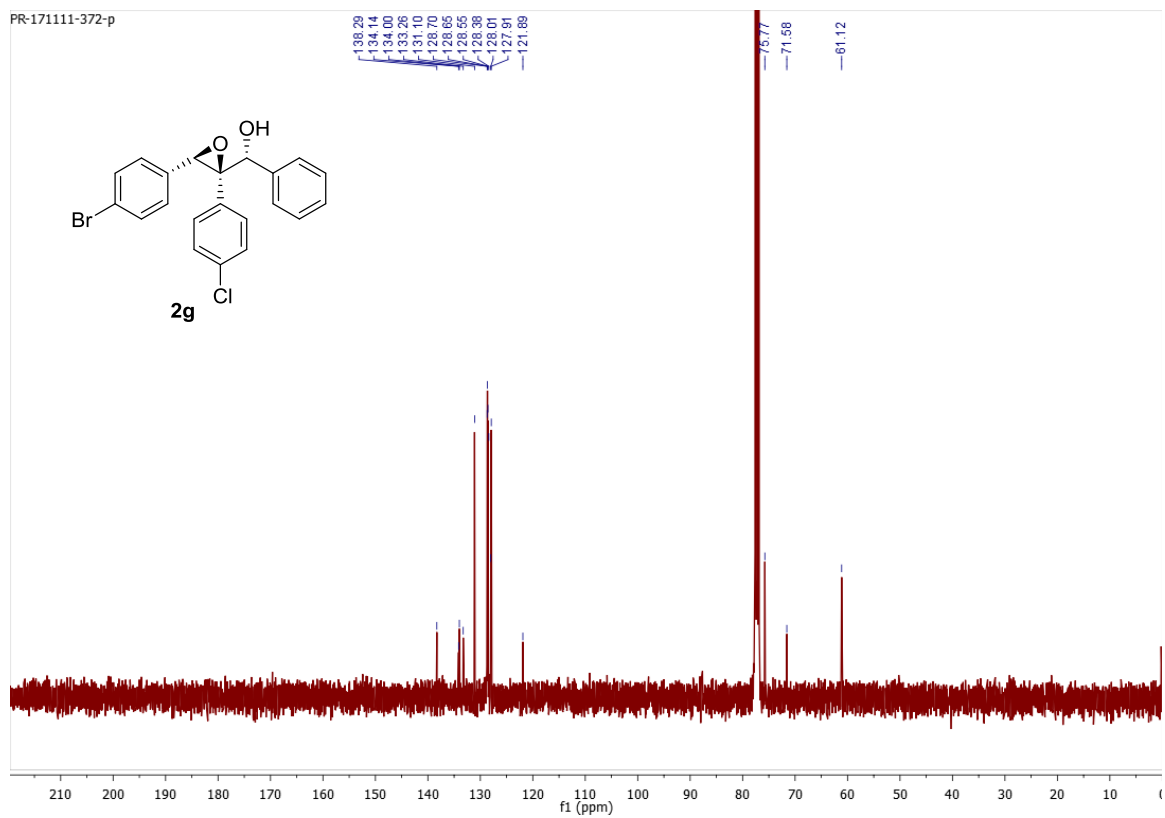

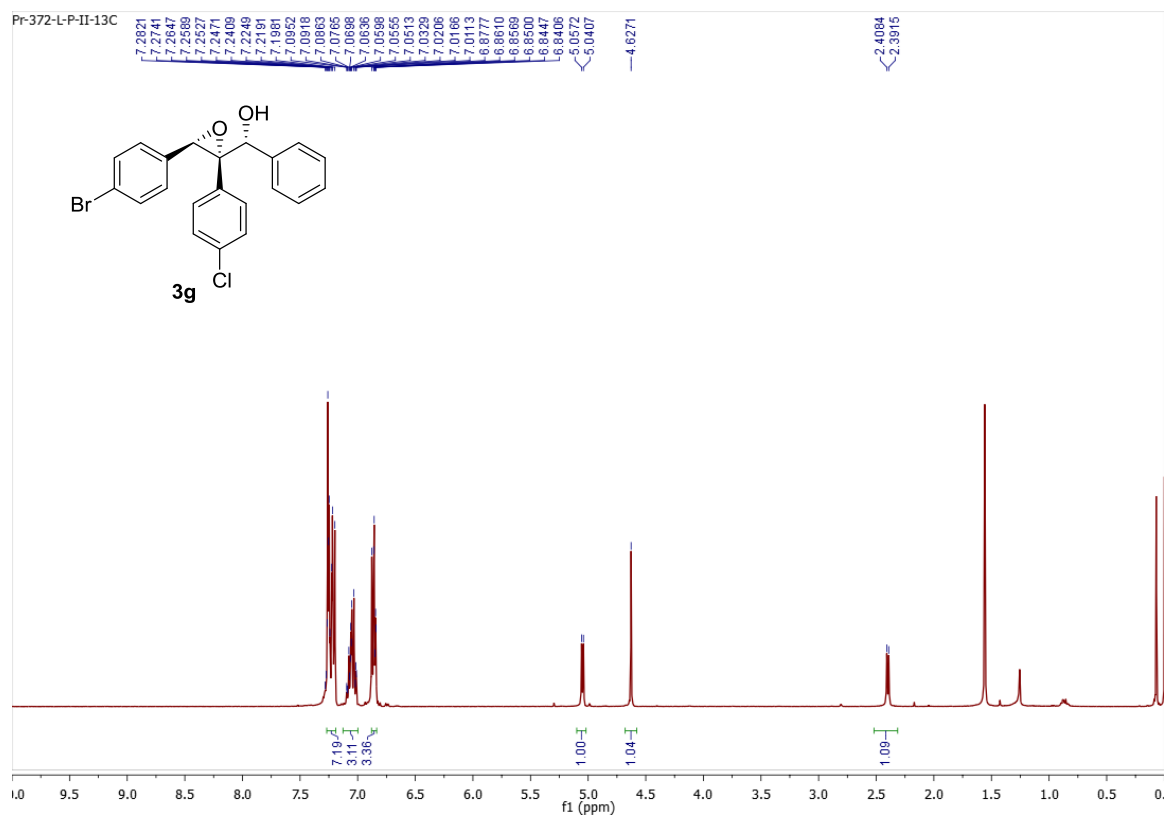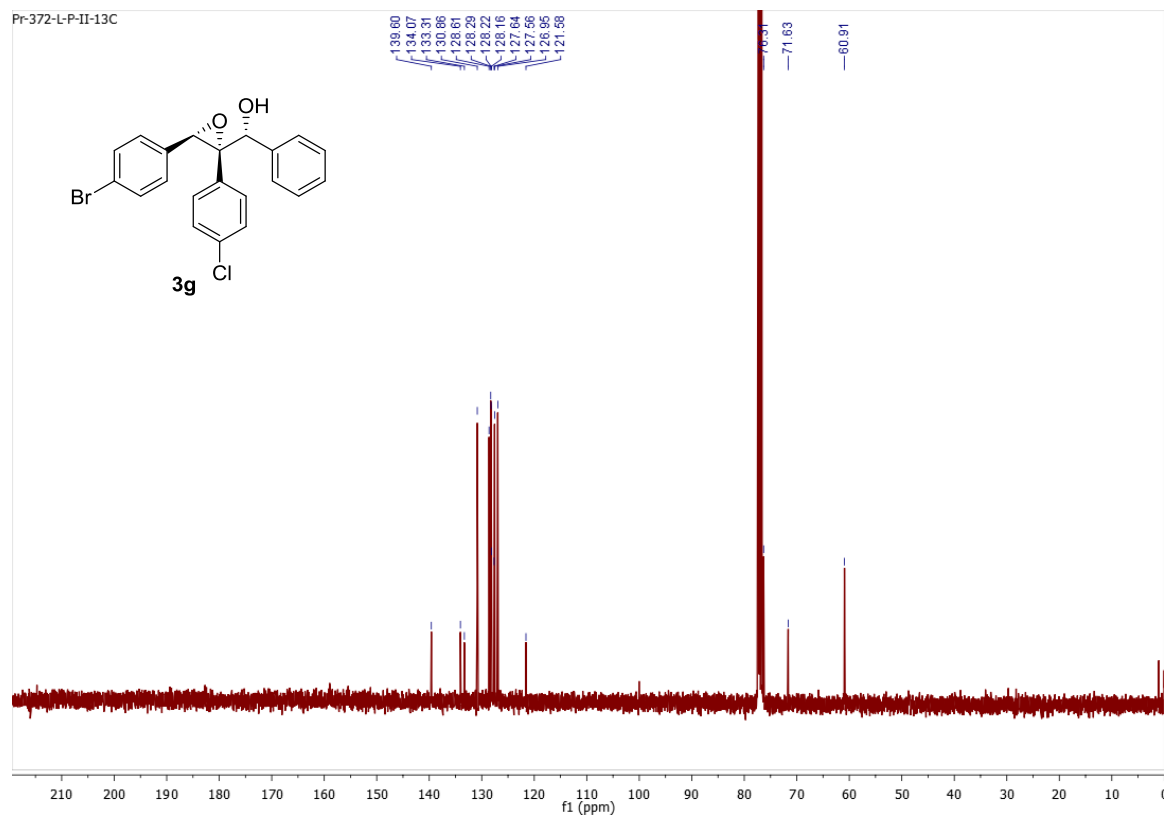

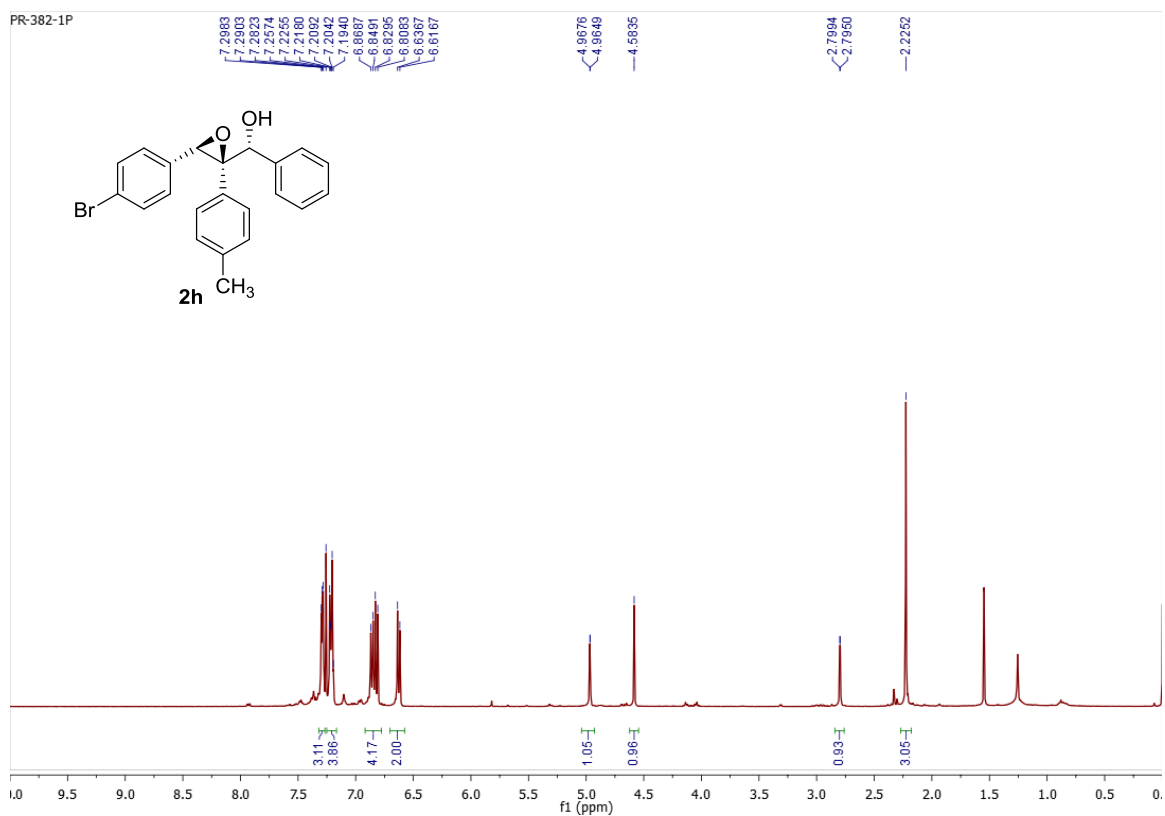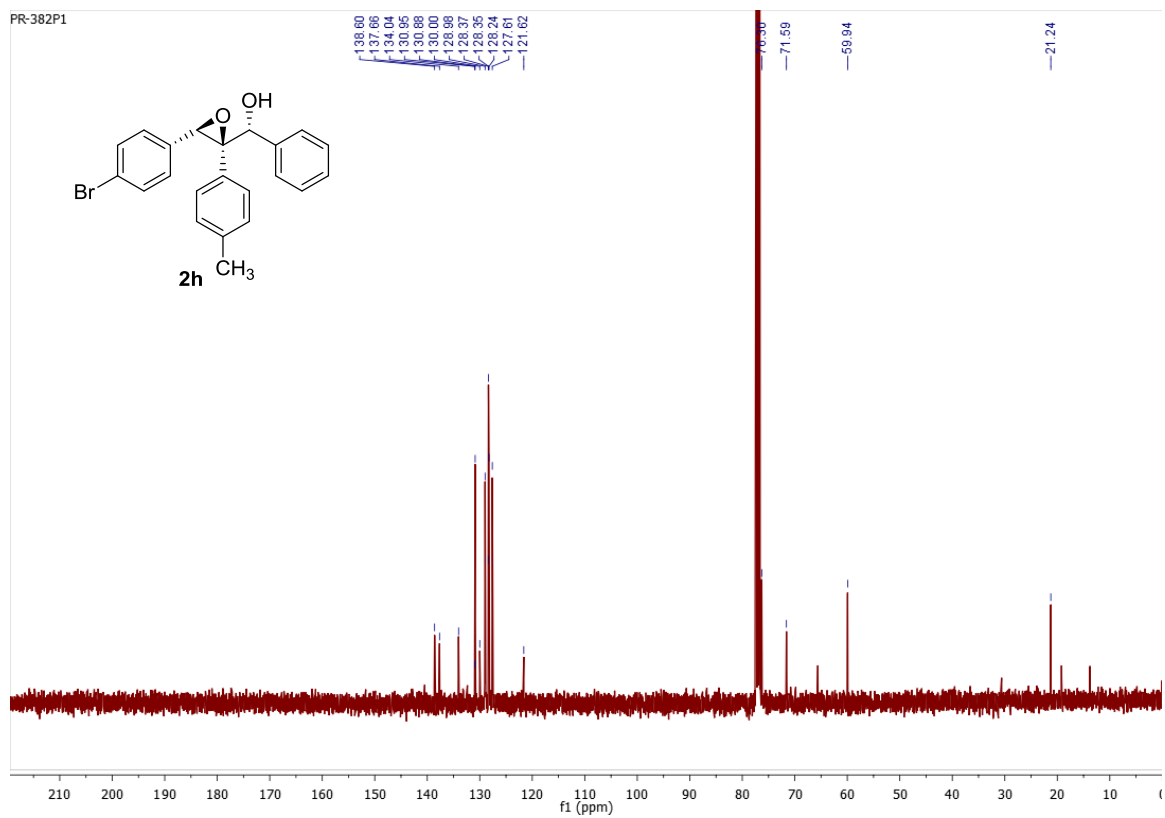

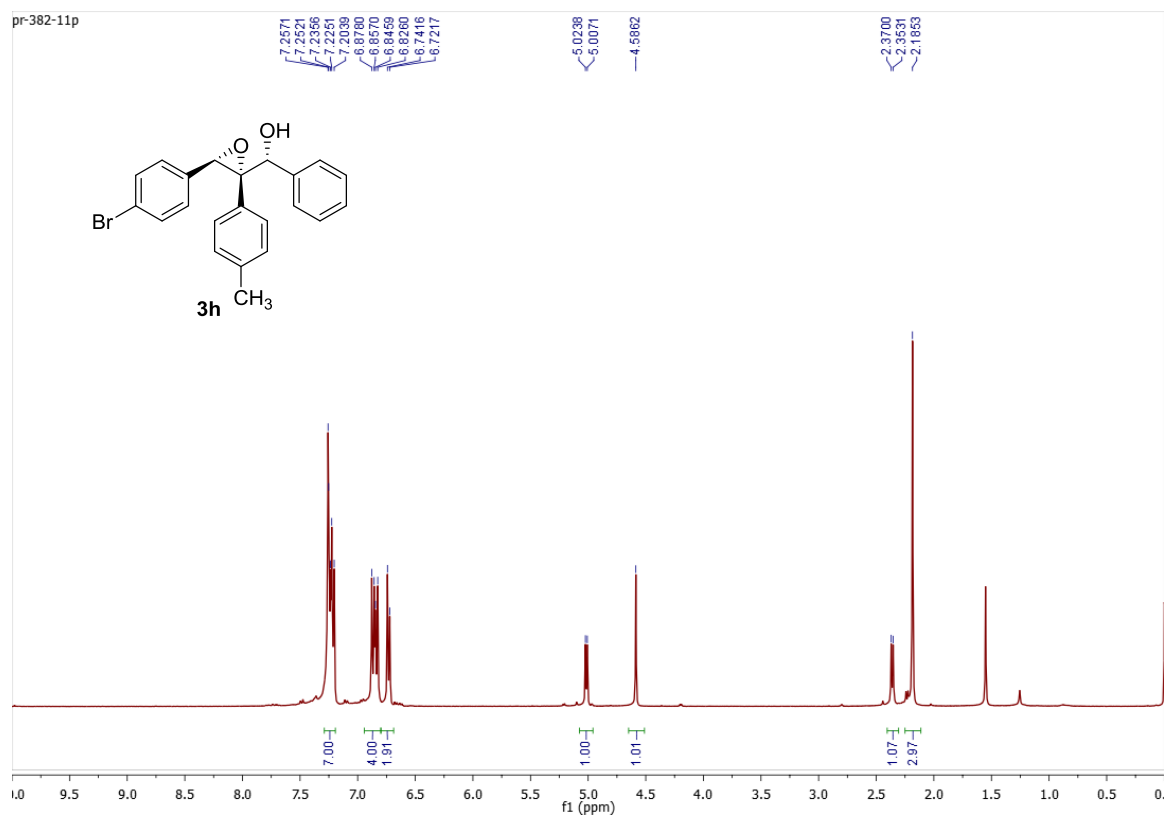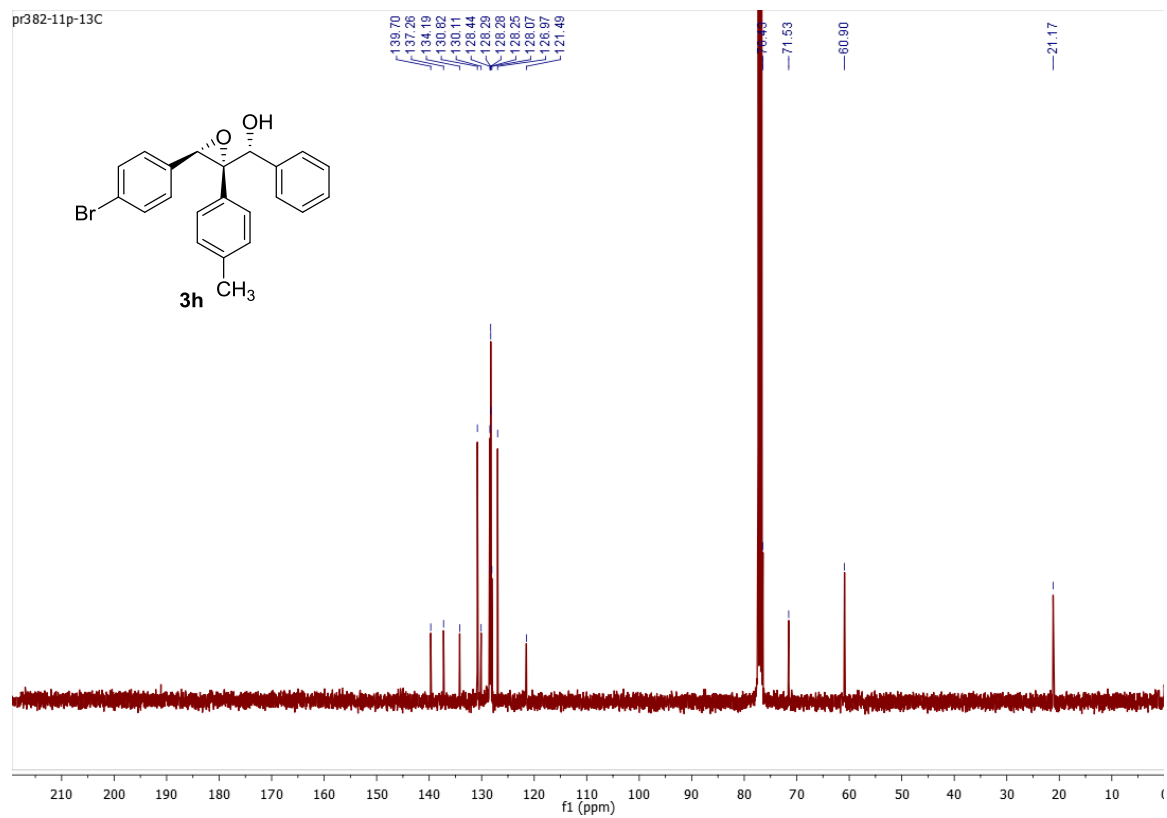



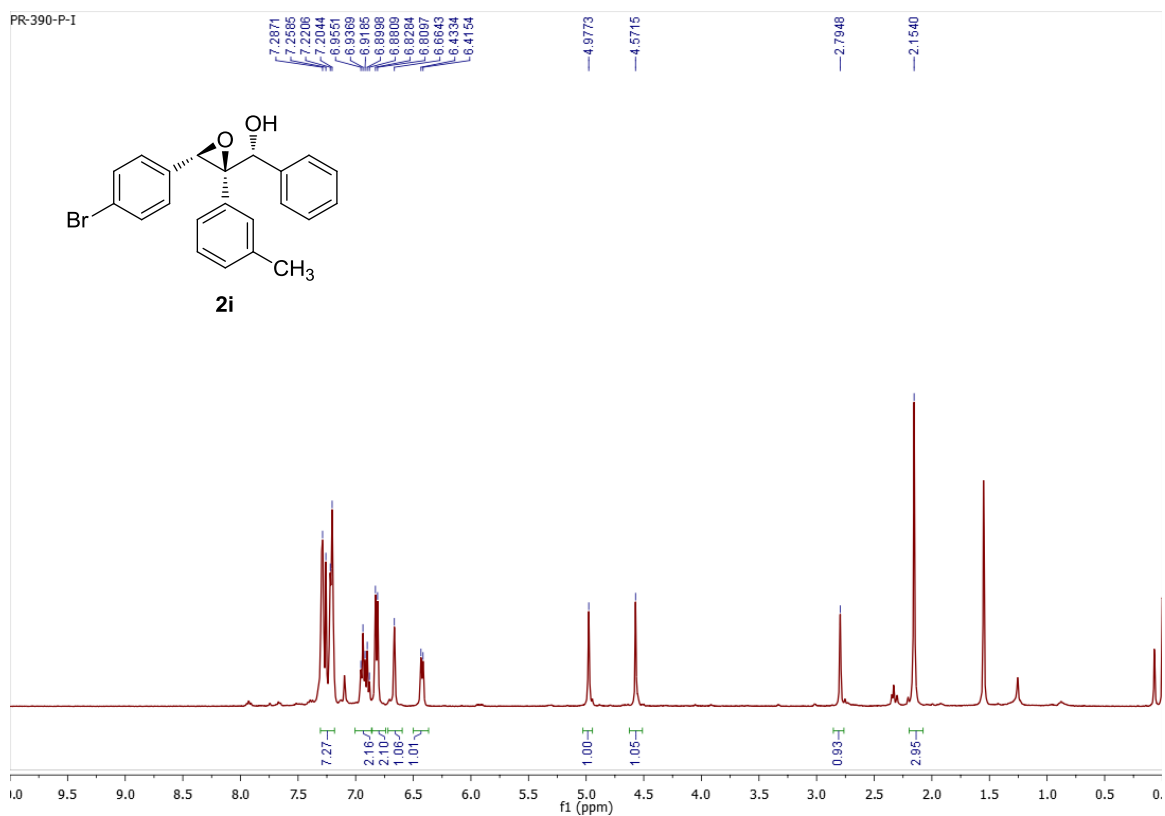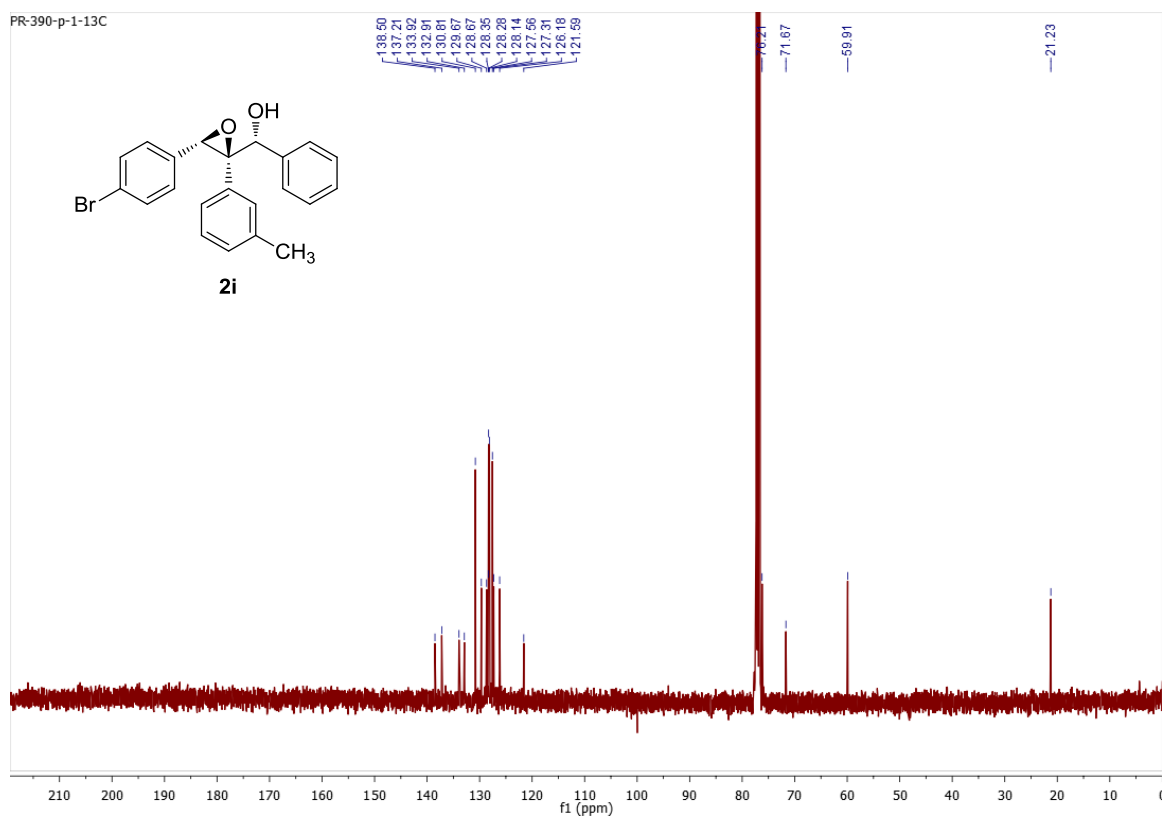

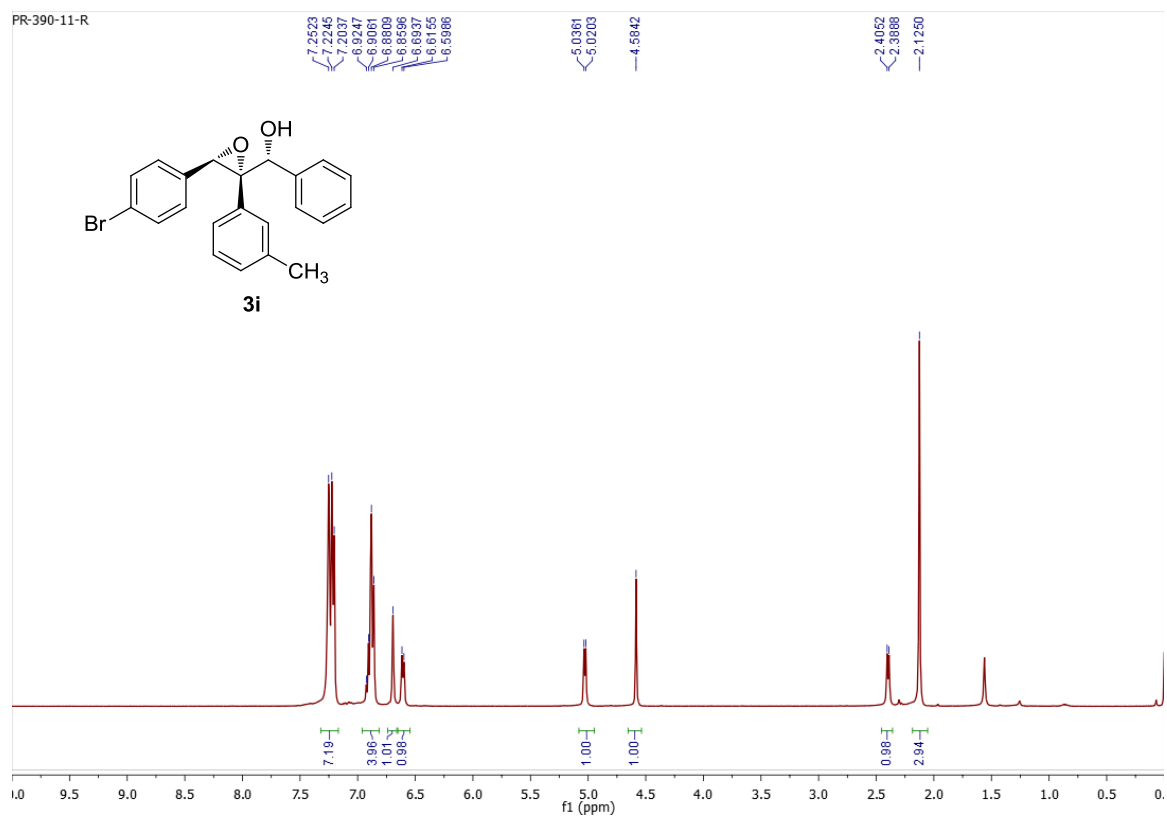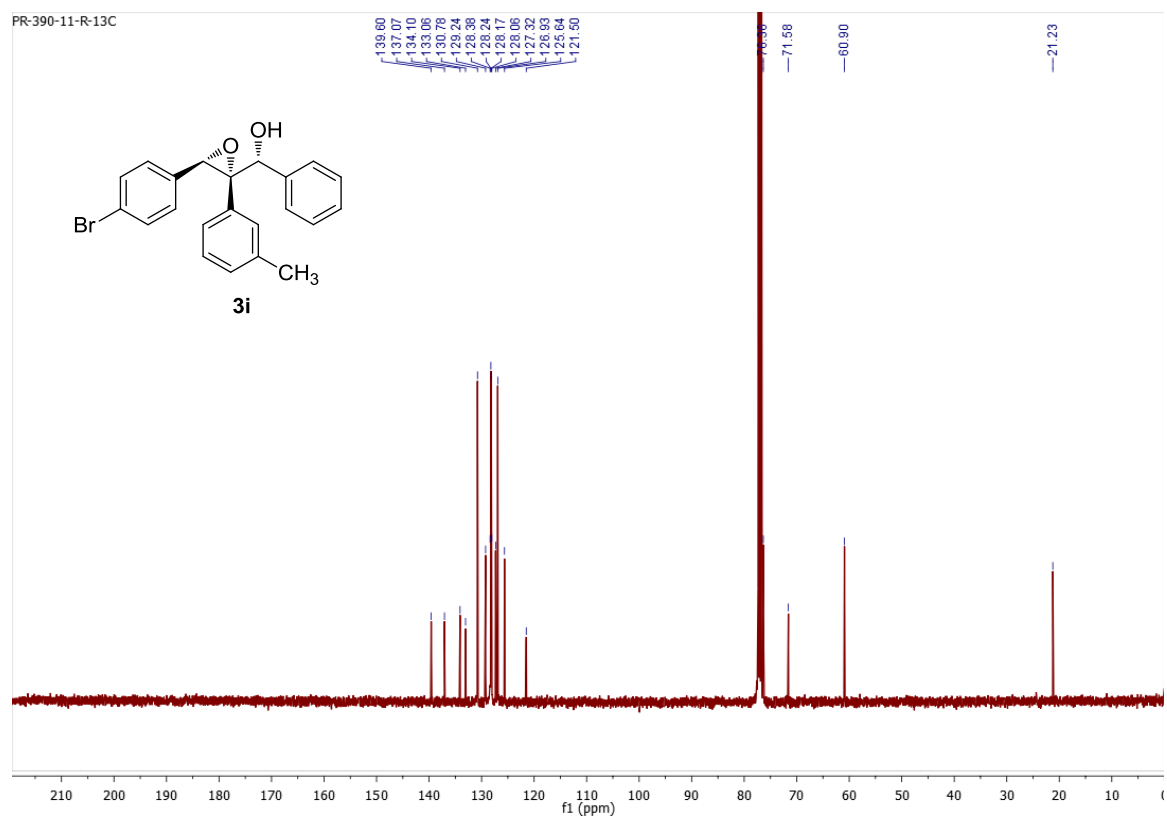

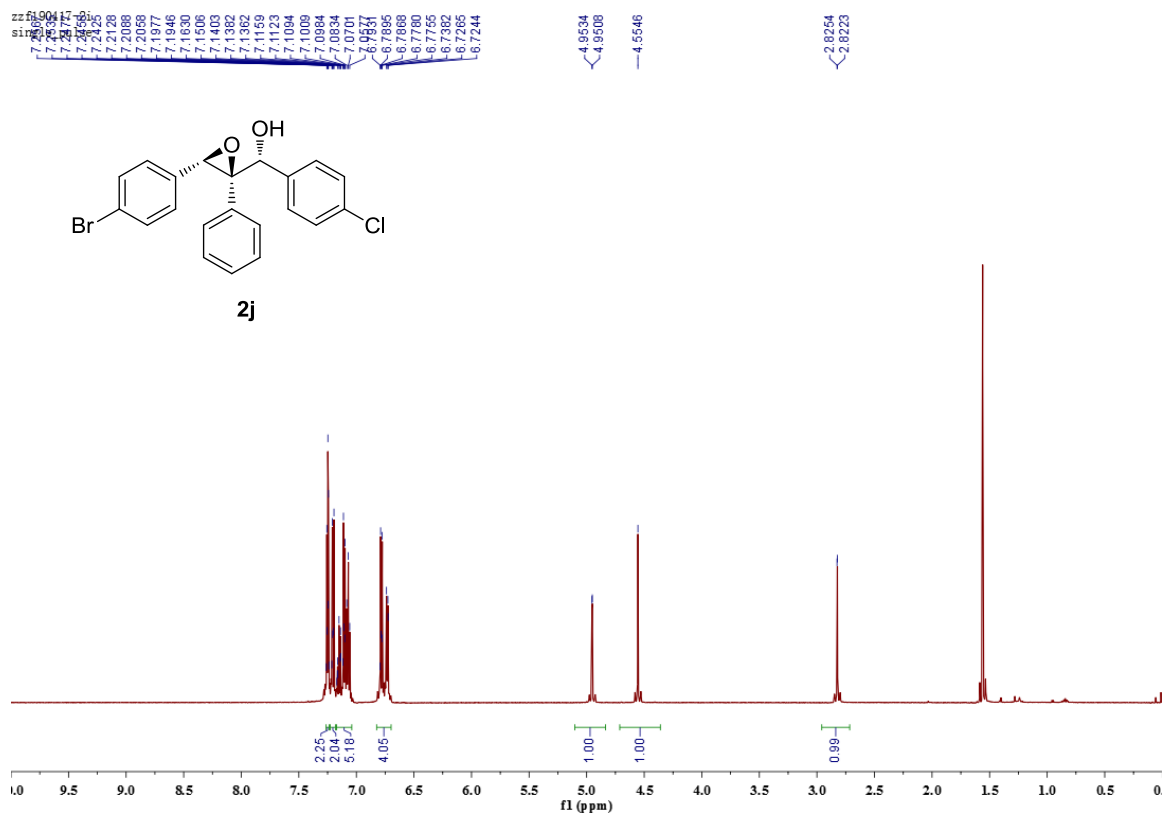

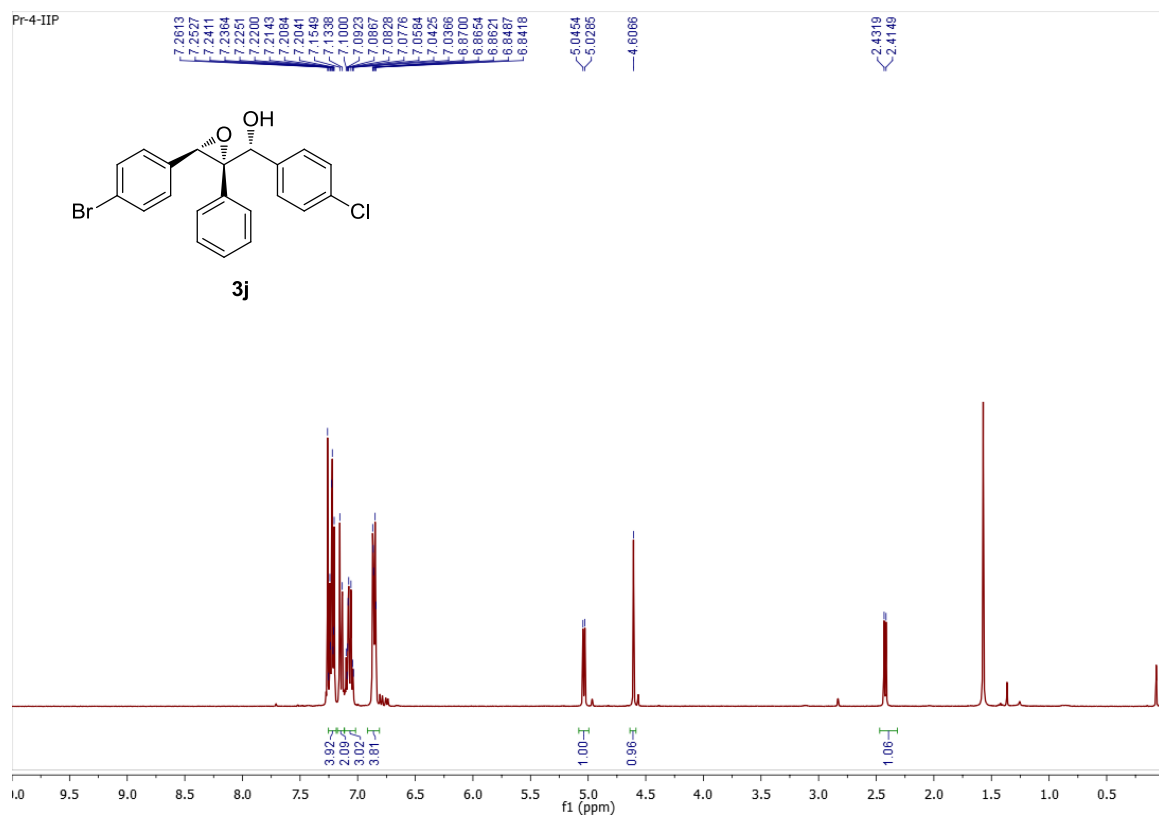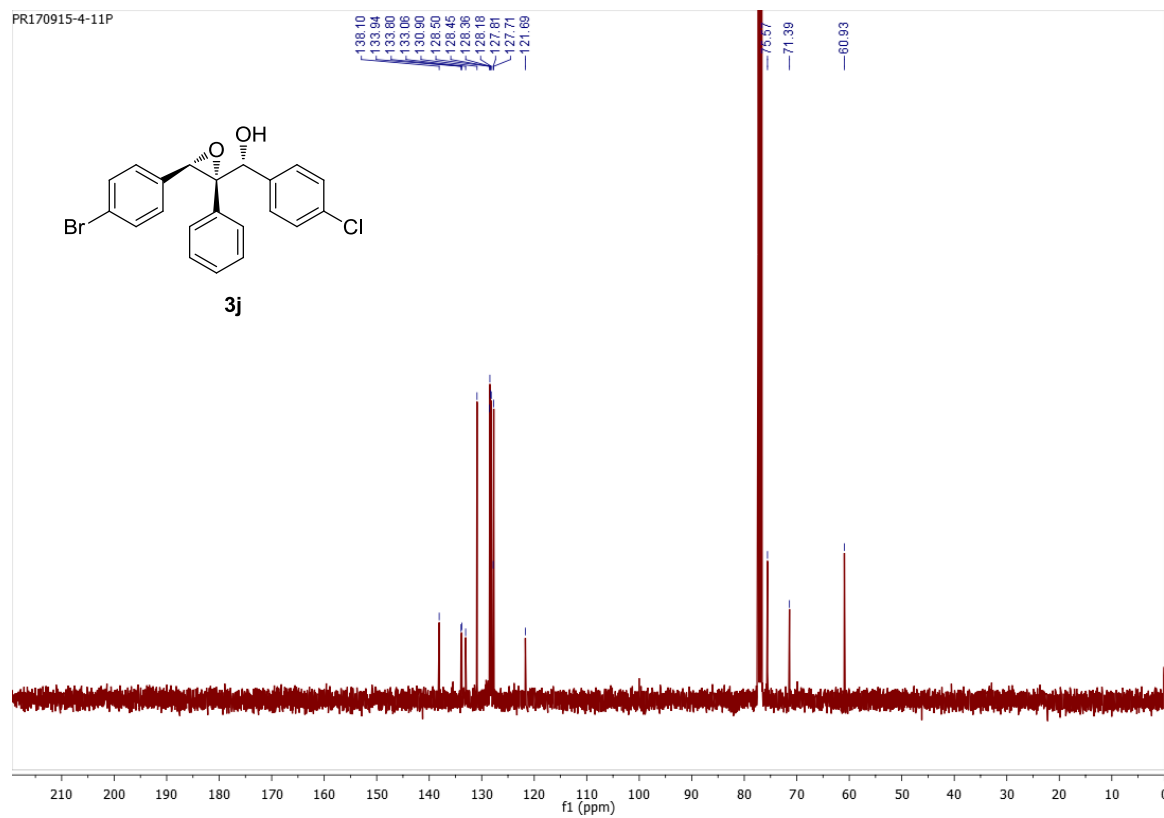

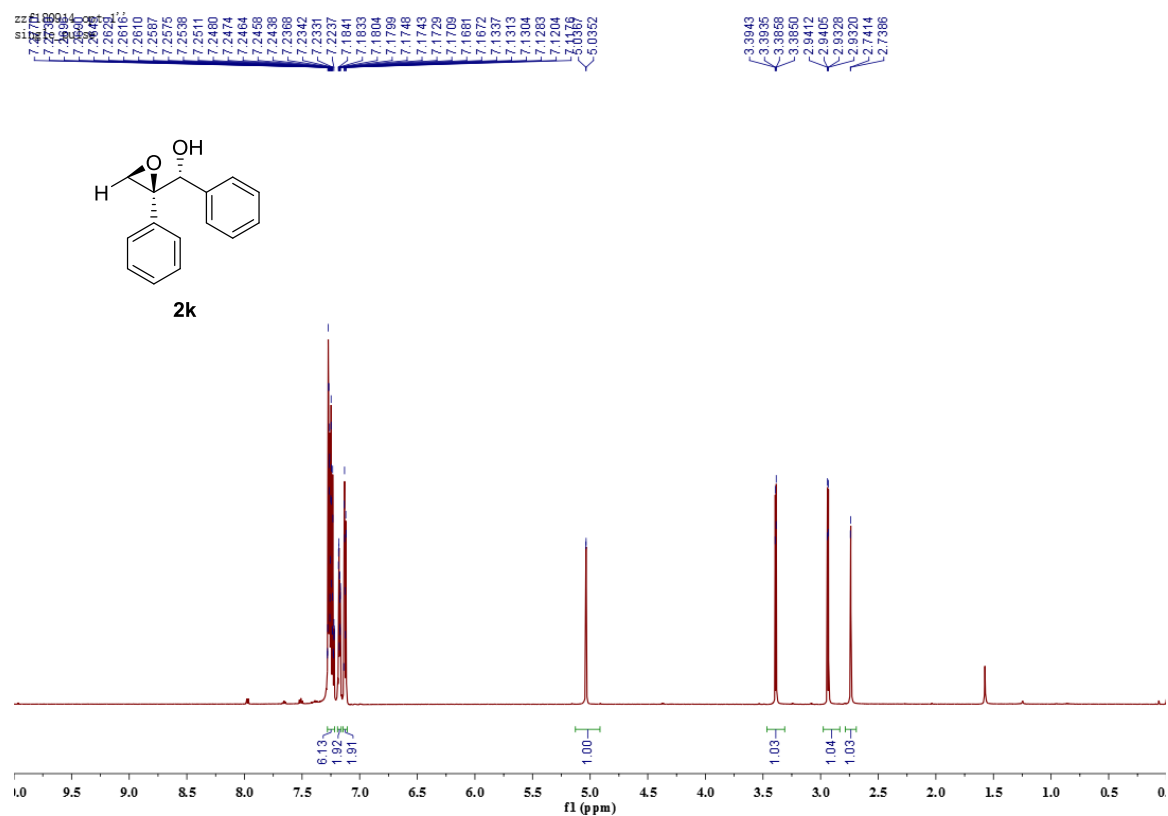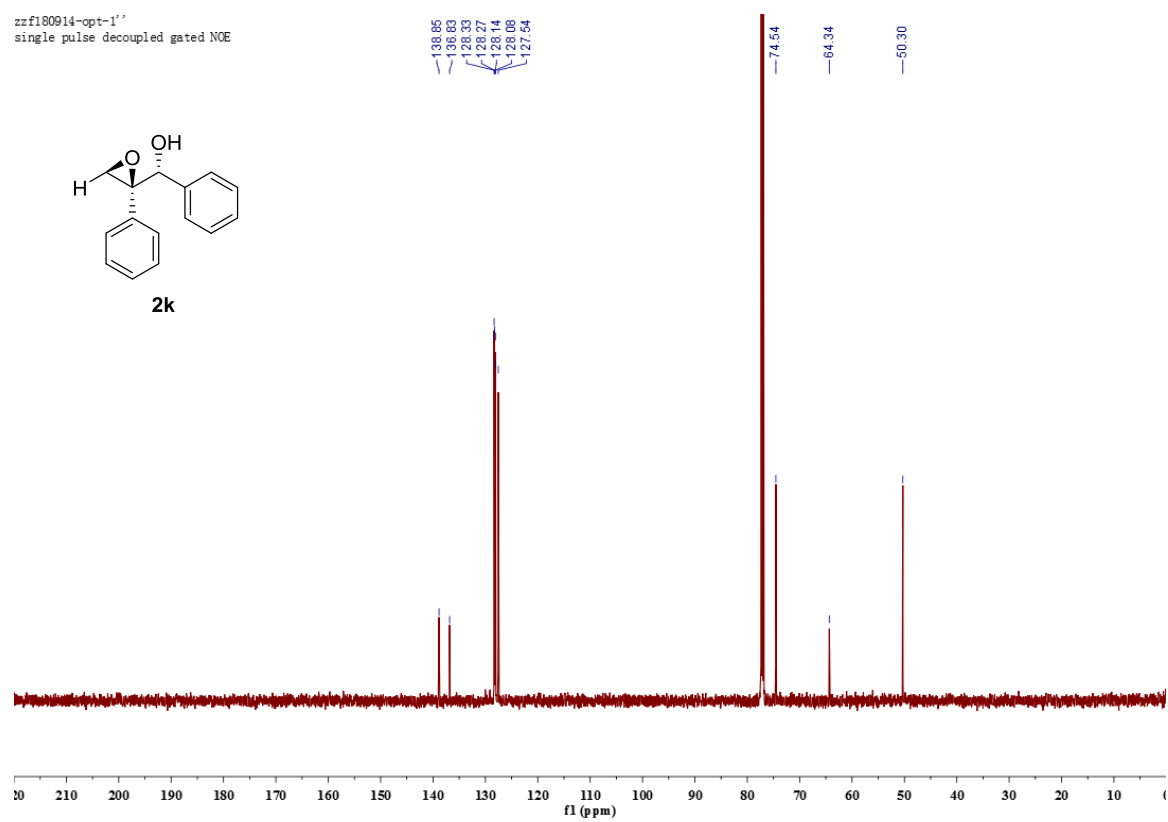

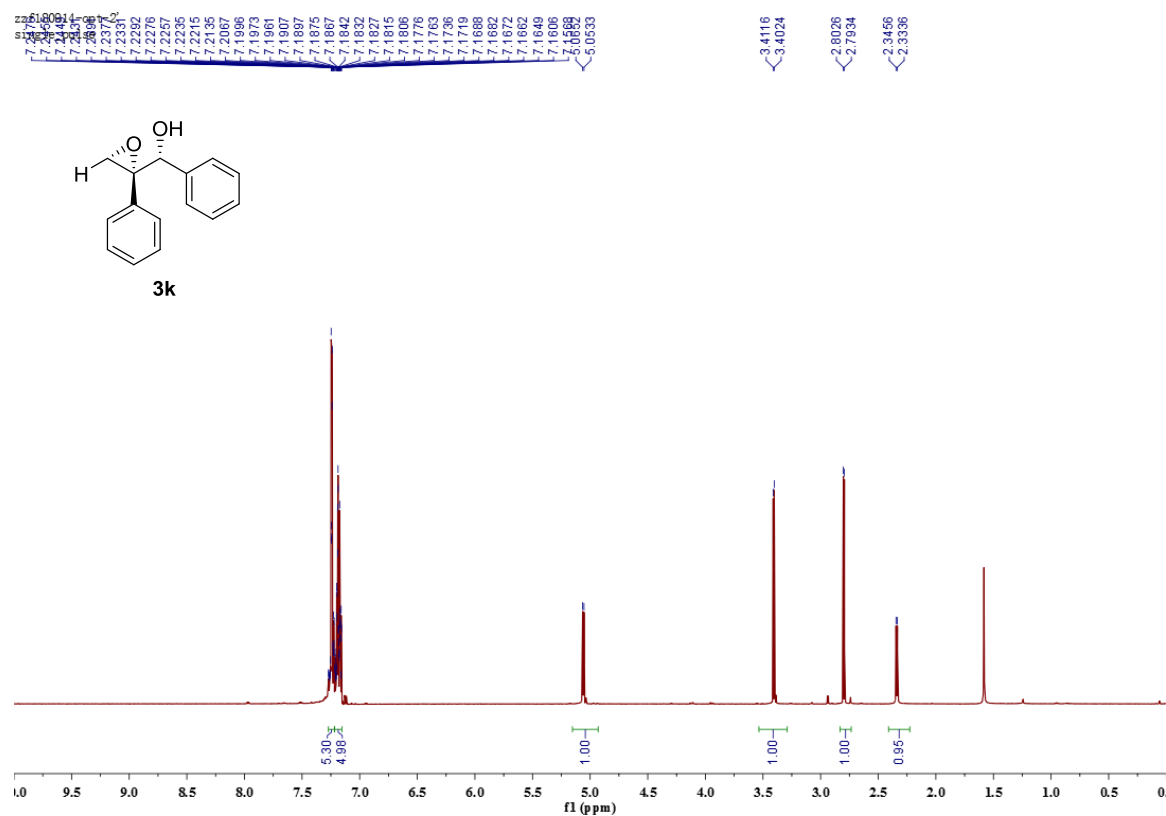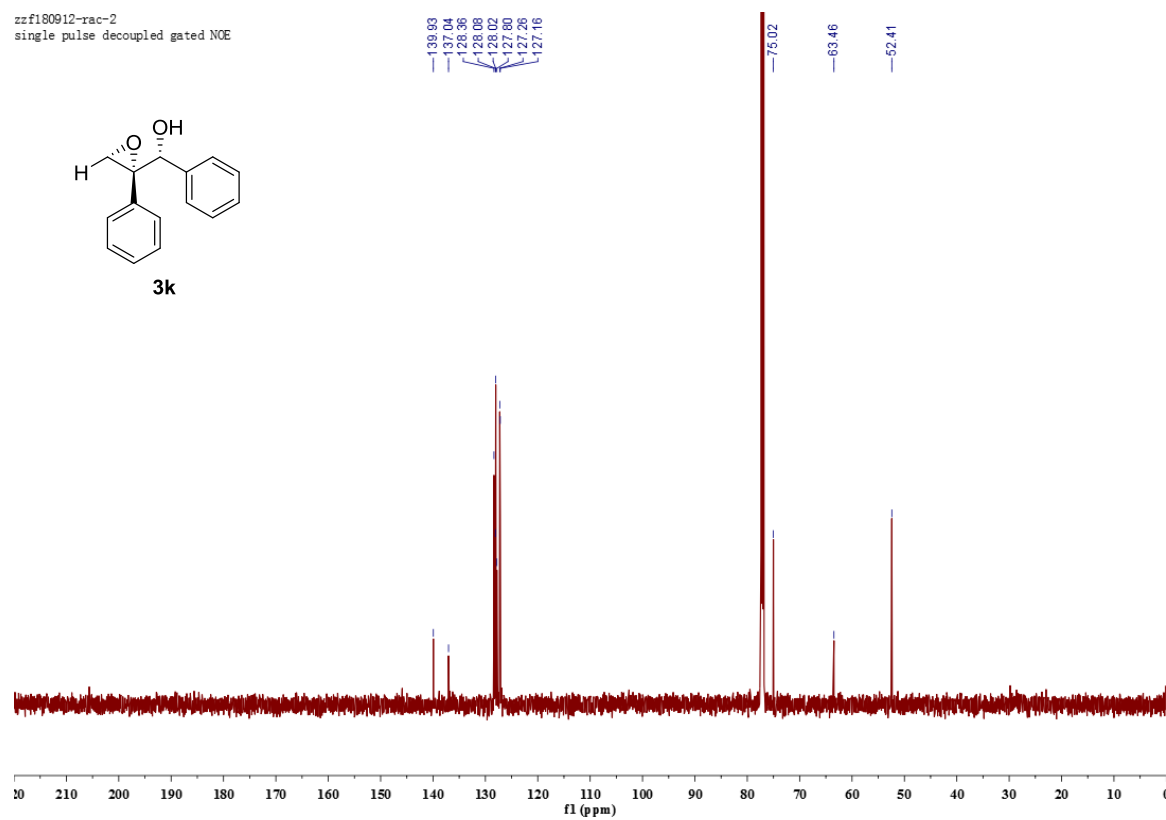

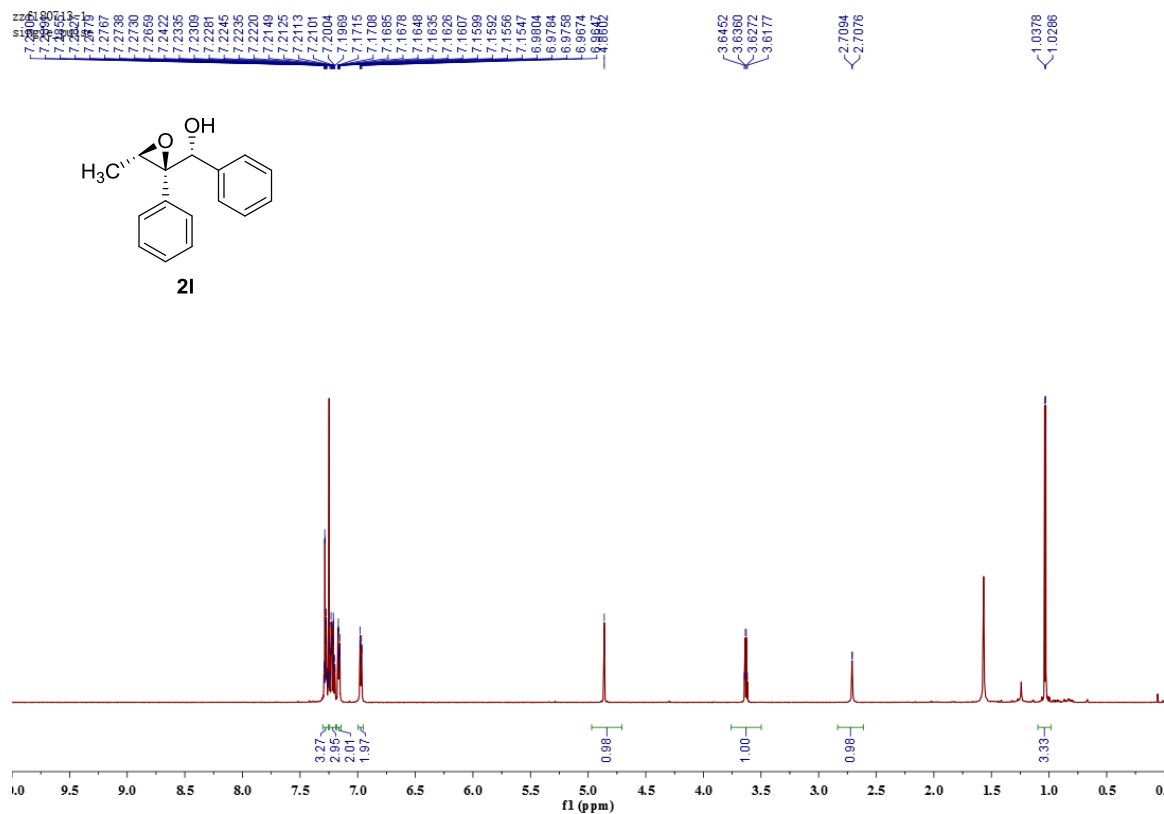

zzf180717-opt-1  
single pulse decoupled gated NOE

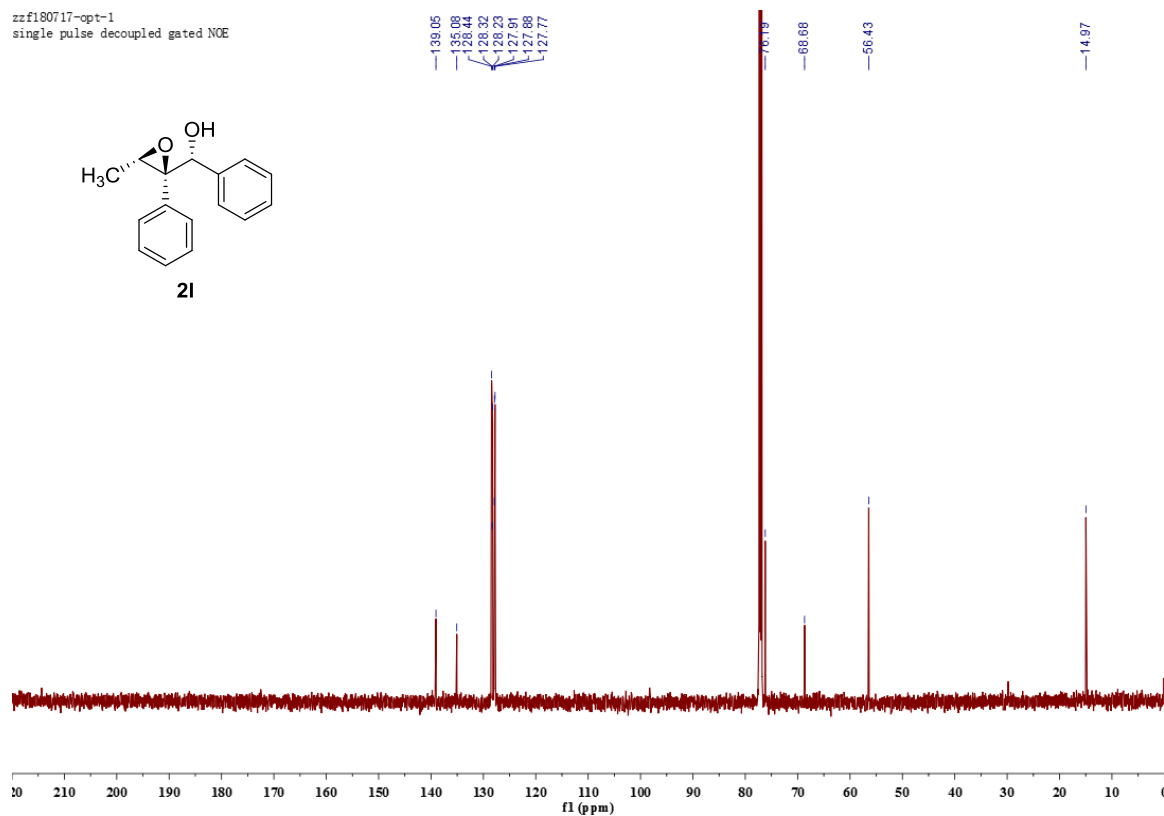

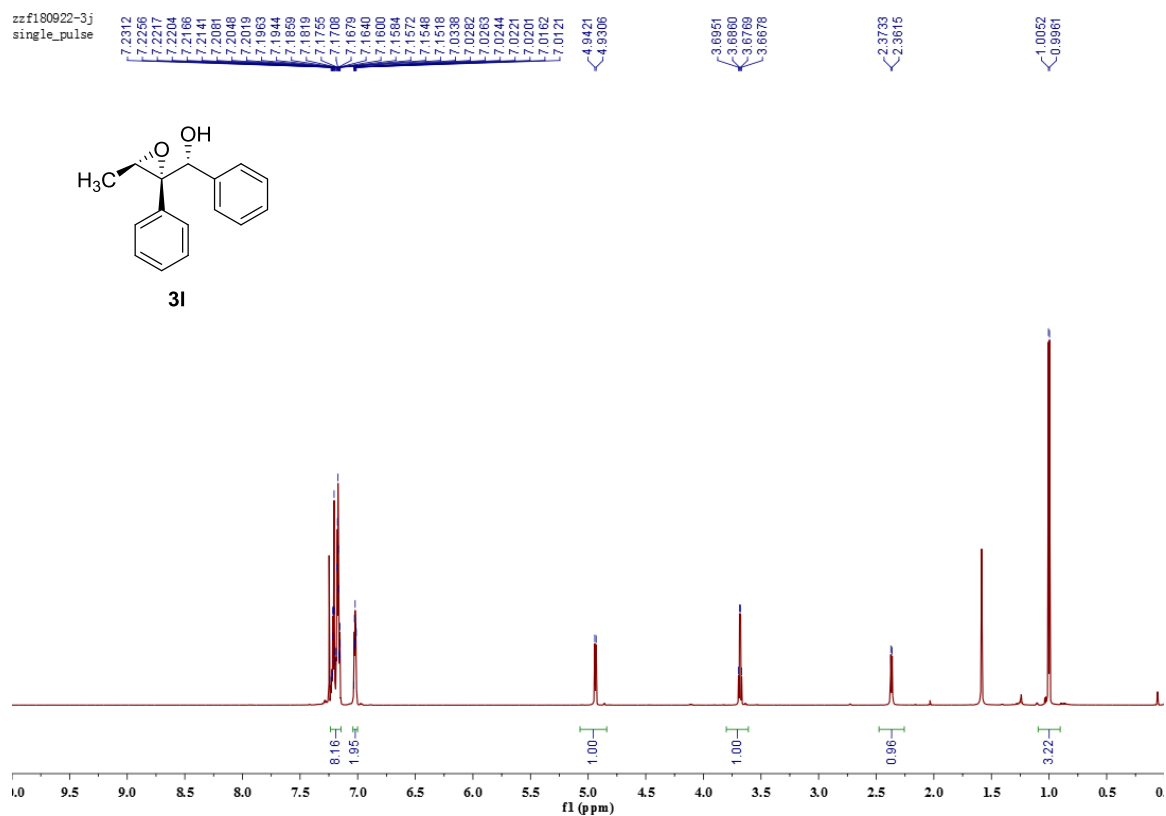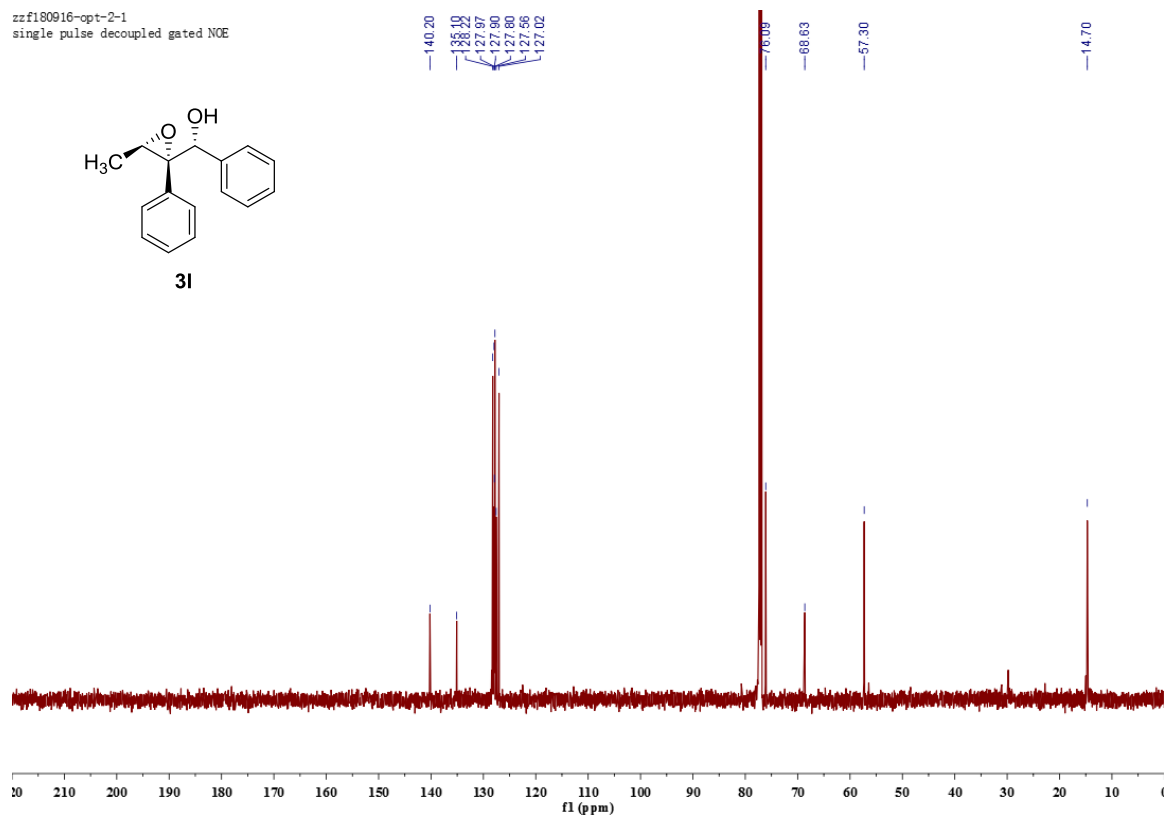



zzf181019-lm-rac-1  
single\_pulse

7.3582  
7.3557  
7.3530  
7.3474  
7.3442  
7.3416  
7.3342  
7.3320  
7.3285  
7.3181  
7.3155  
7.3131  
7.3078  
7.3035  
7.2914  
7.2815  
7.2785  
7.2749  
7.2699  
7.2673  
7.2656

4.1195  
4.1148  
4.1088  
4.1043  
4.0981  
4.0936  
4.0876  
4.0829  
3.9502  
3.9466  
3.0855  
3.0817  
3.0808  
3.0770

2.1652

1.3130  
1.3022

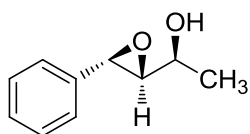

2m

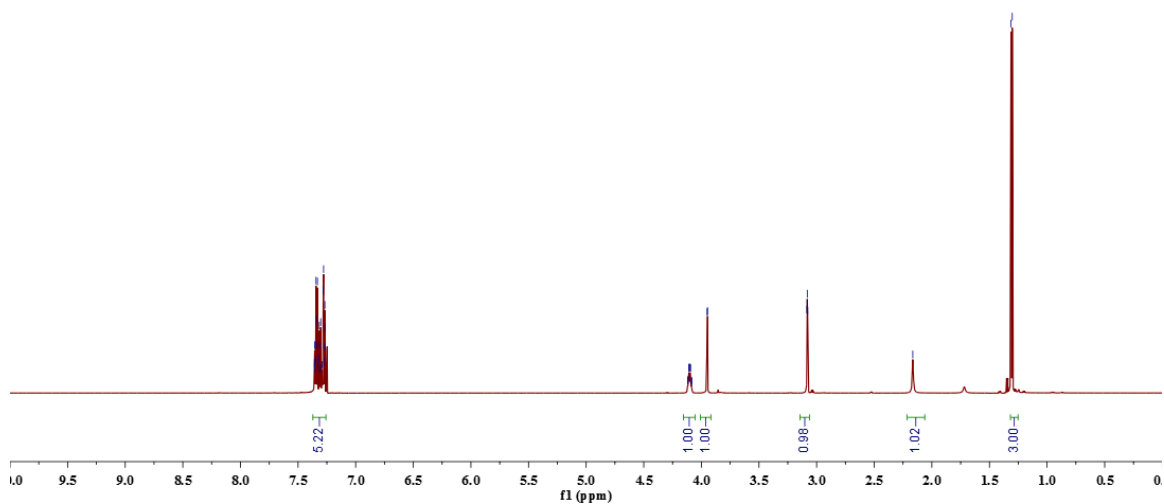

zzf181207-lm-rac-1  
single pulse decoupled gated NOE

136.98  
128.62  
128.38  
125.80

65.72  
64.90

54.75

18.82

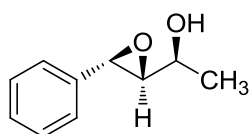

2m

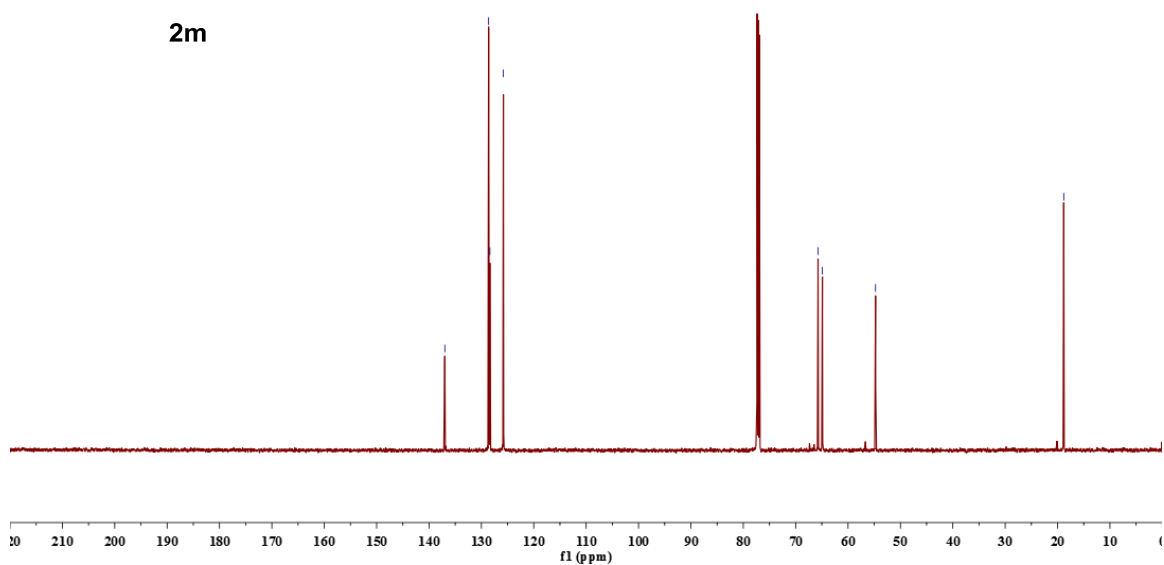

zzf181019-lm-rac-2  
single\_pulse

7.3592  
7.3566  
7.3483  
7.3452  
7.3426  
7.3352  
7.3329  
7.3205  
7.3179  
7.3155  
7.3080  
7.3010  
7.2962  
7.2938  
7.2866  
7.2821  
7.2764  
7.2701  
7.2673  
7.2637  
7.2587  
7.2561  
7.2541

3.8613  
3.8578

3.0426  
3.0390  
3.0350  
3.0314

1.8687  
1.8587

1.3556  
1.3447

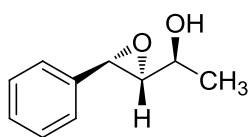

3m

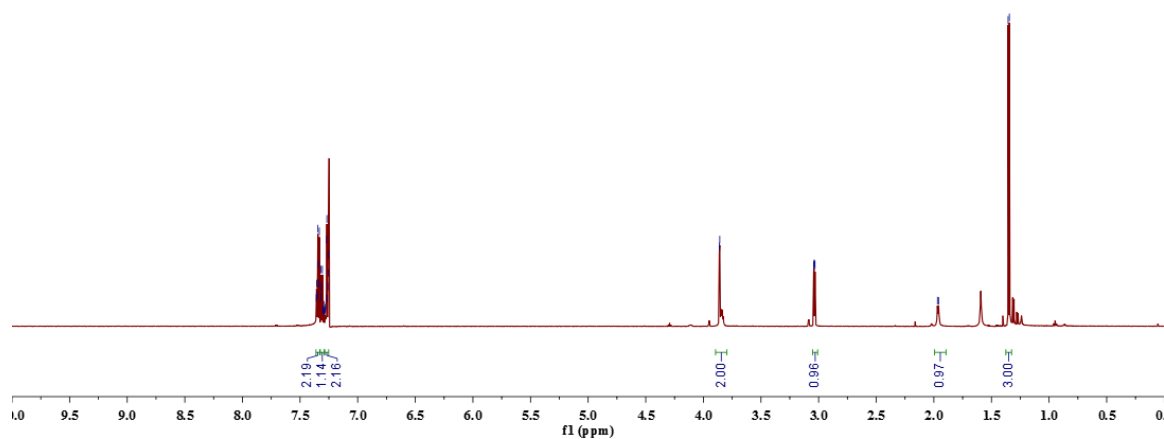

zzf181207-lm-rac-2  
single pulse decoupled gated NOE

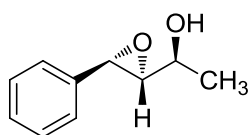

3m

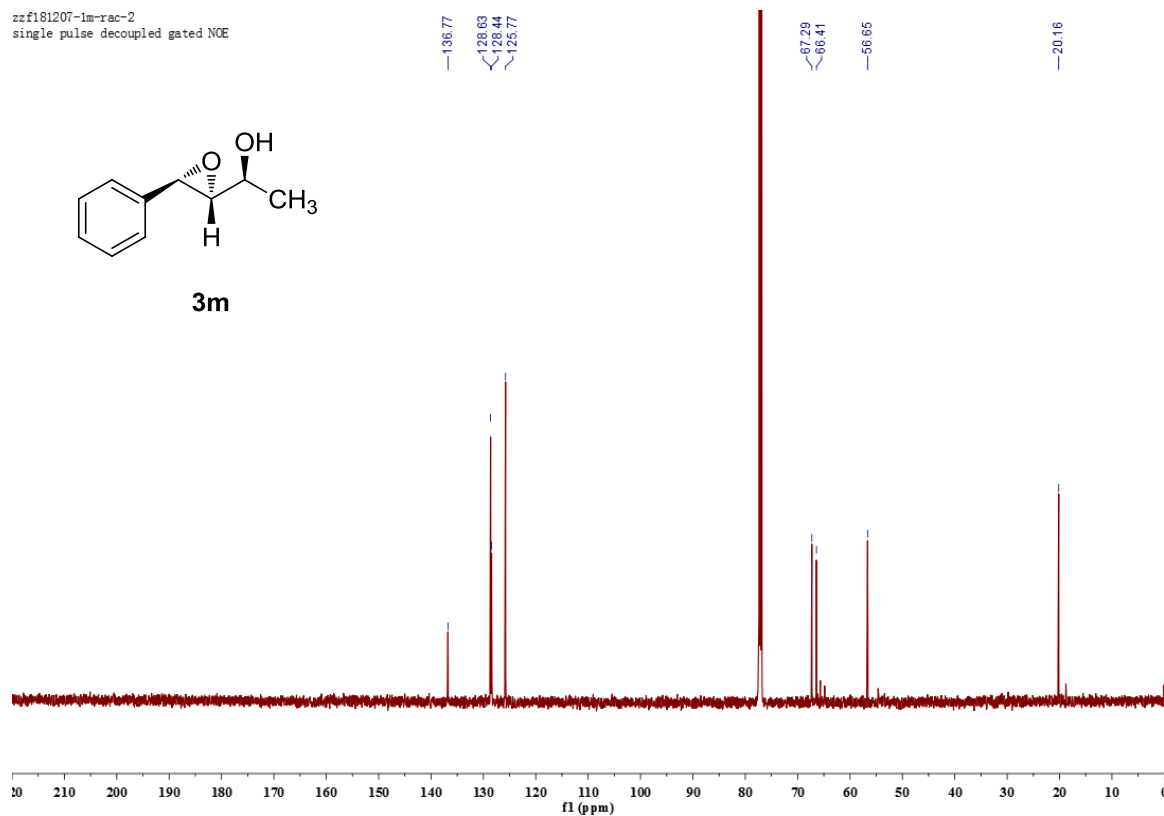

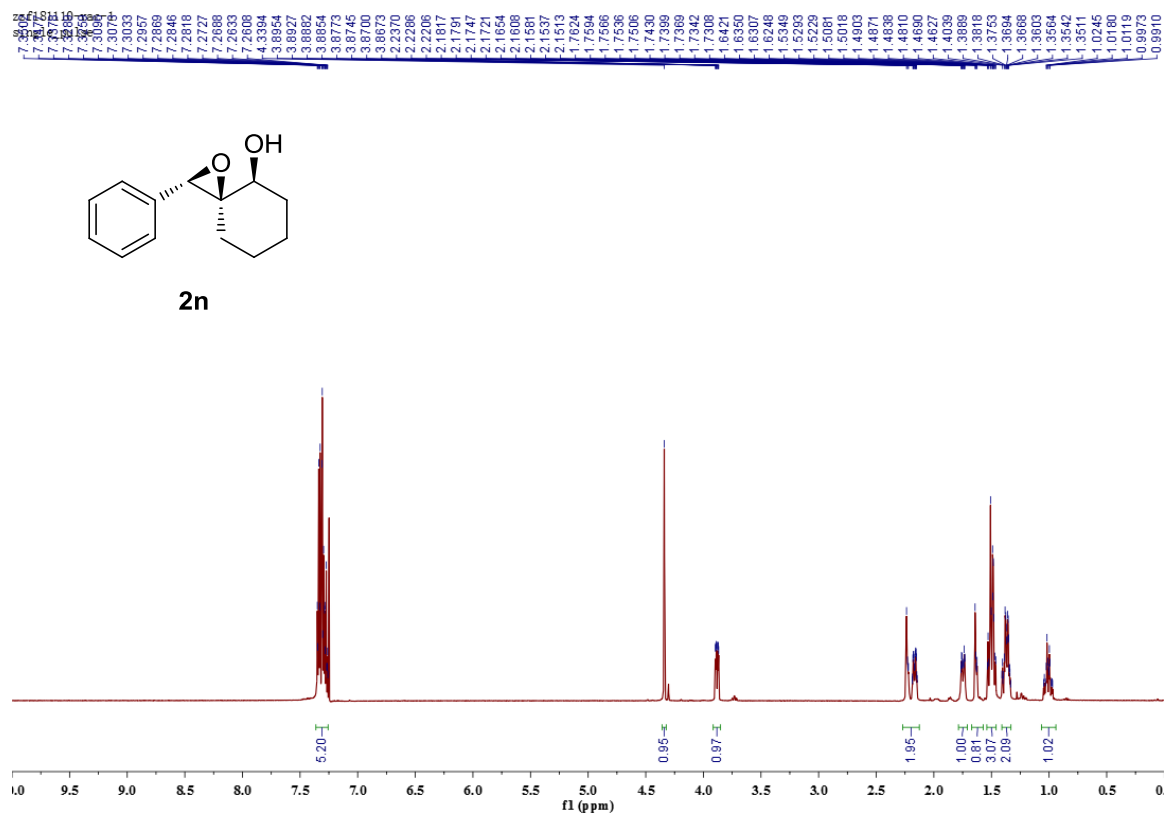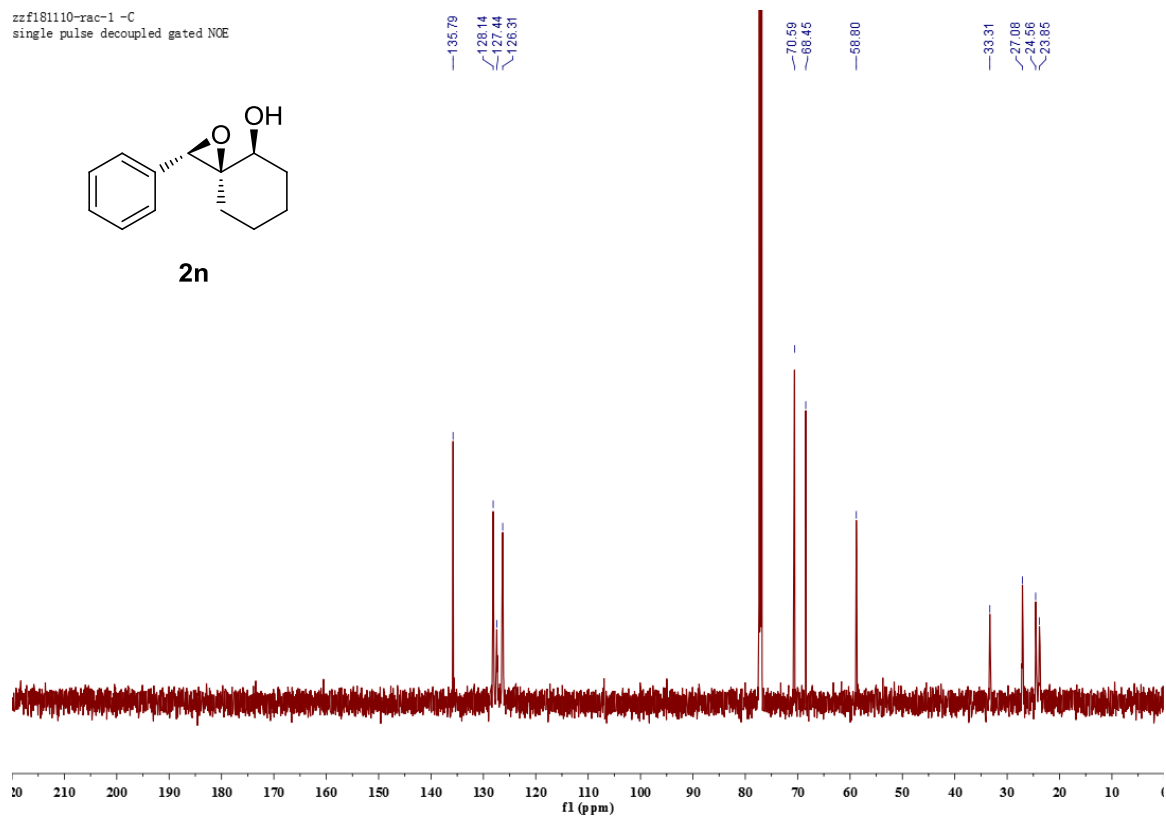

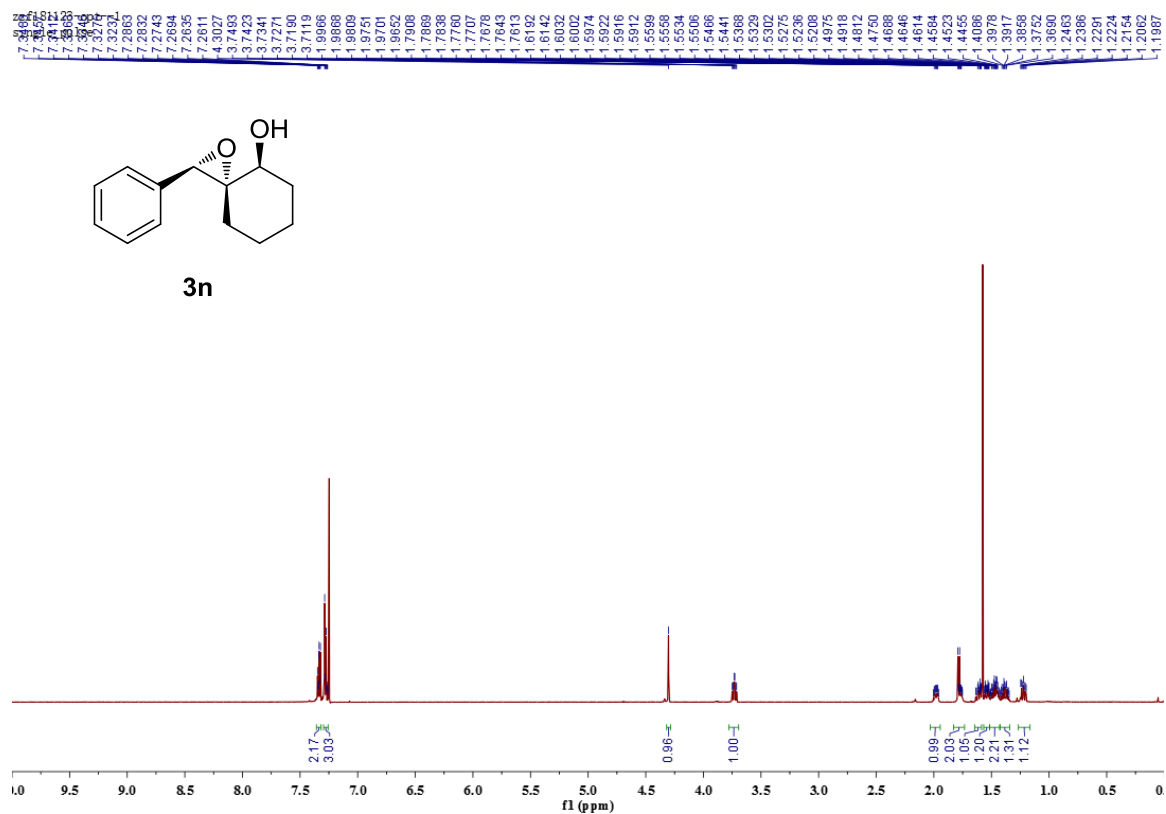

zzf181123-opt-1 1  
single pulse decoupled gated NOE

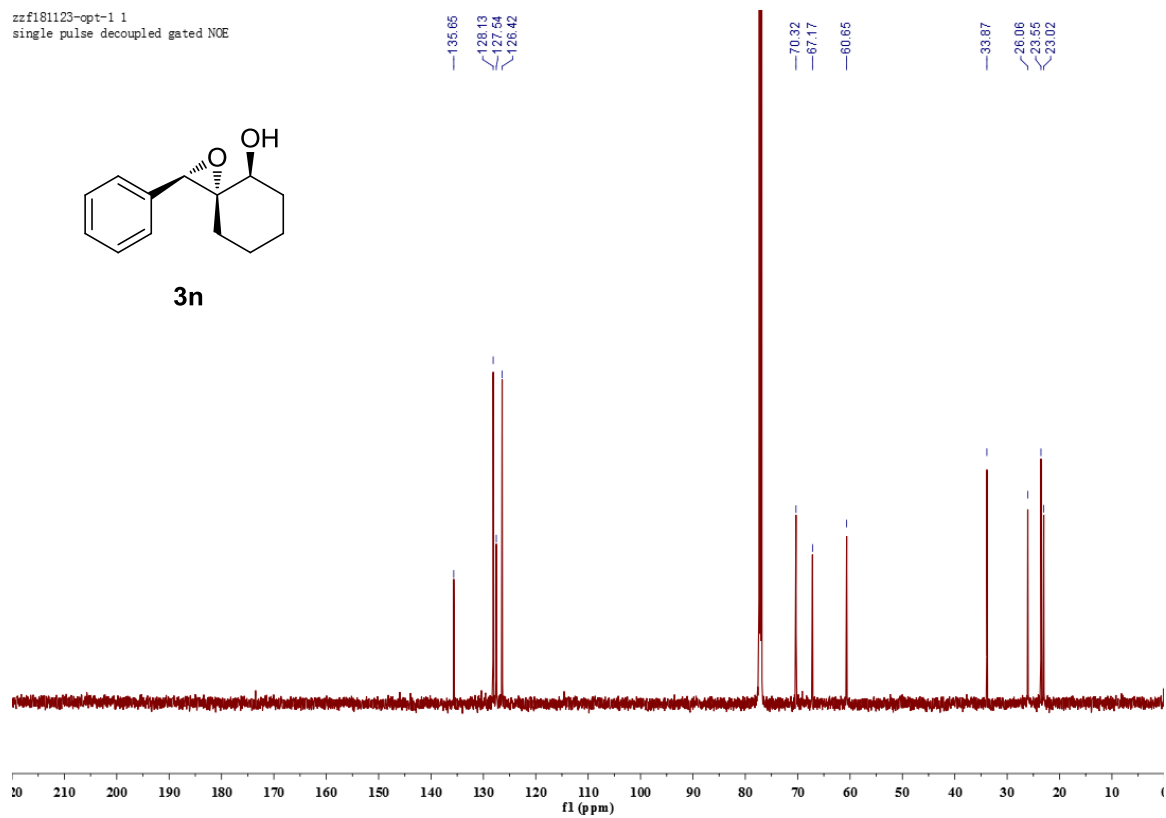

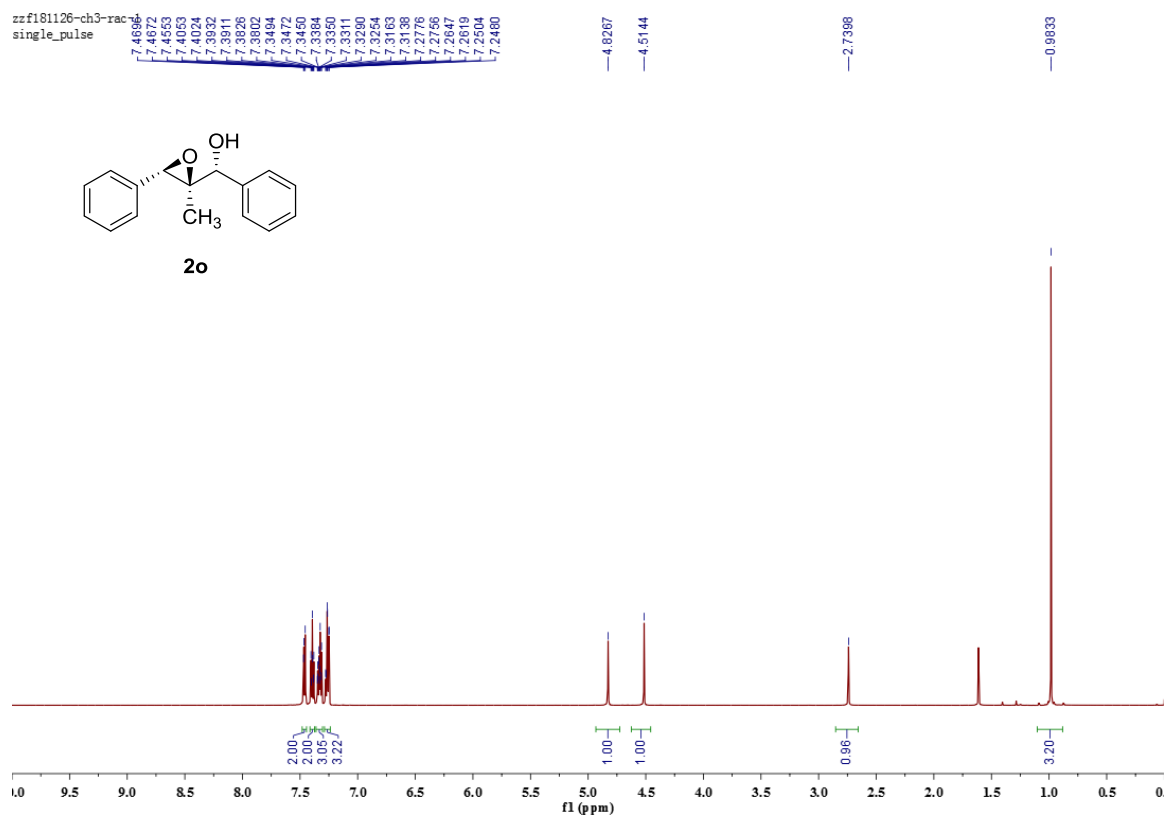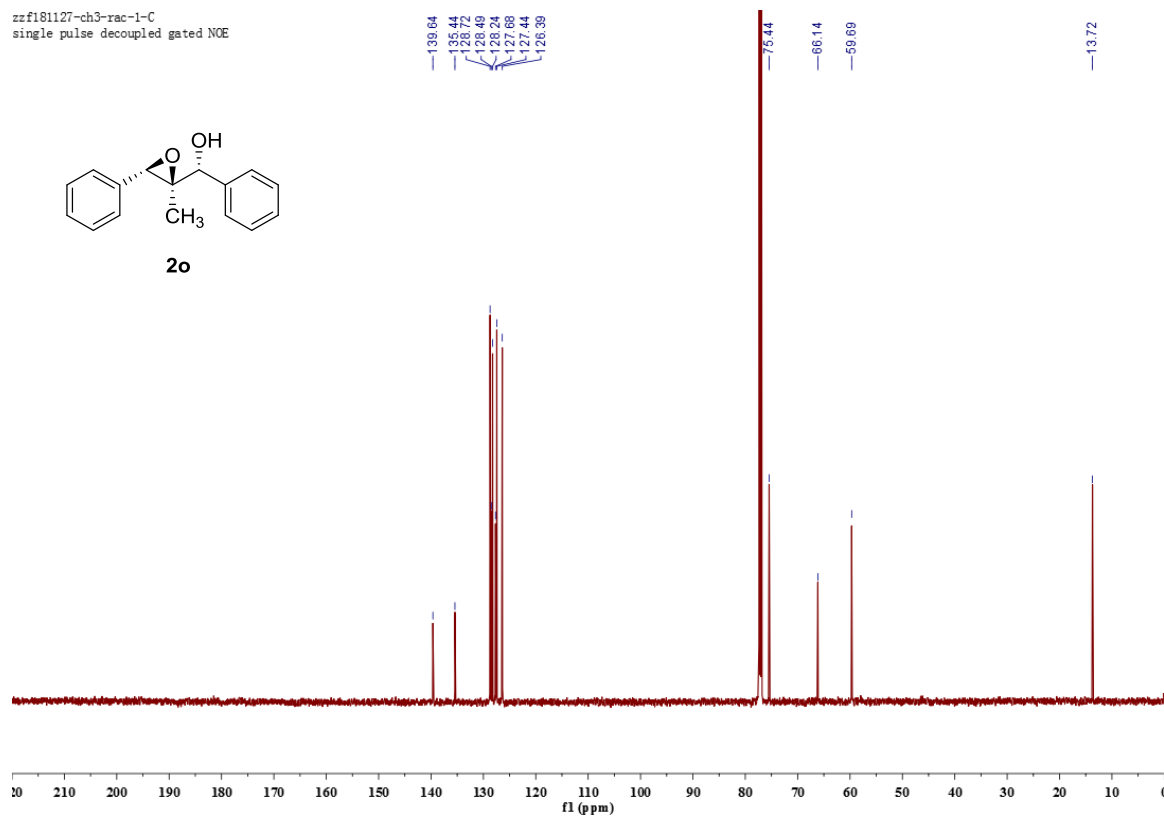



zzf181228-F  
single\_pulse

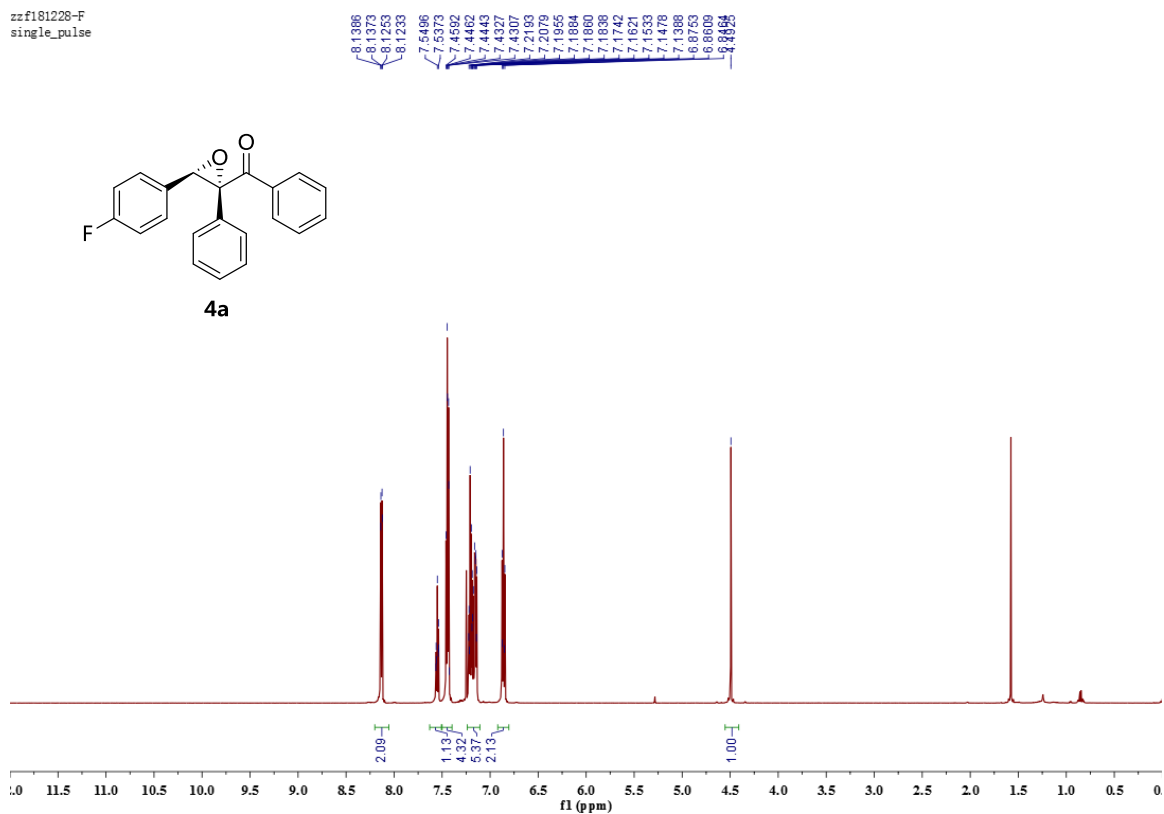

zzf180925-1e  
single pulse decoupled gated NOE

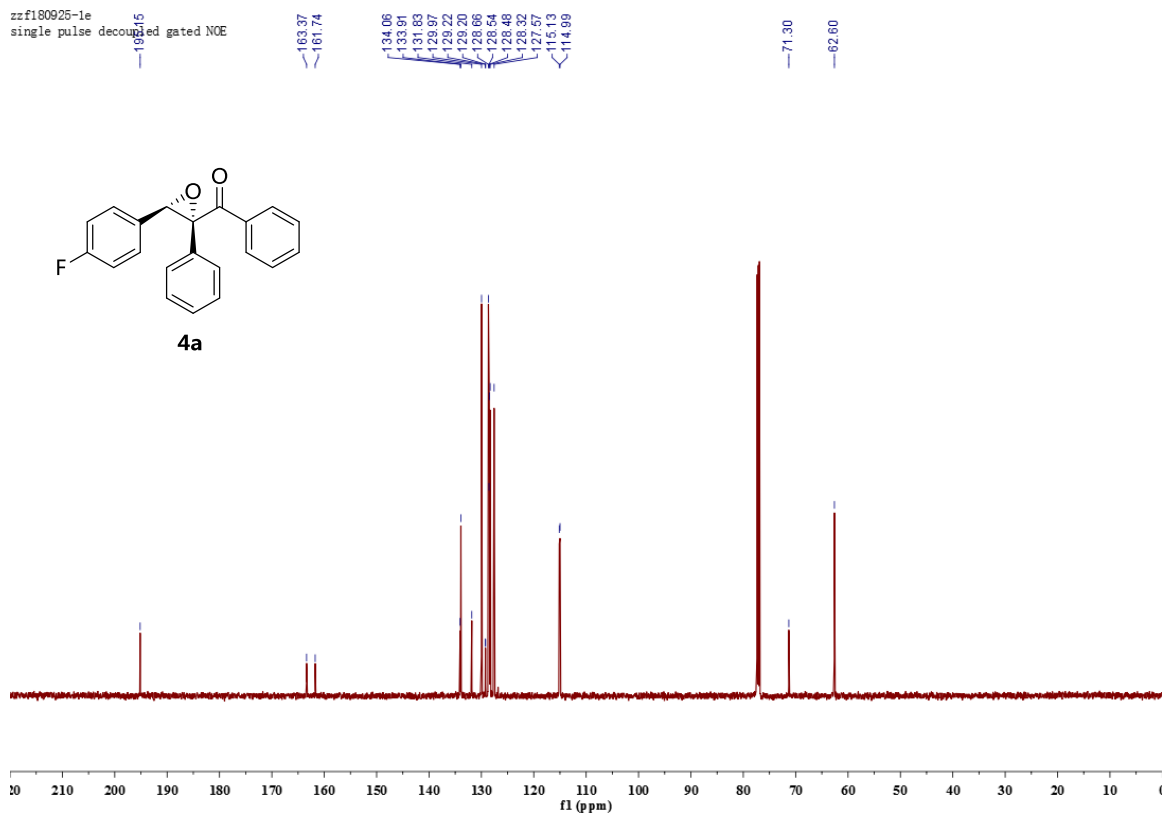

zzf181114-N3  
single\_pulse

7.1588  
7.1476  
7.1454  
7.1393  
7.1297  
7.1223  
7.1183  
7.1163  
7.1081  
7.1028  
7.0989  
6.9070  
6.8979  
6.8923  
6.8871  
6.8832  
6.8501  
6.8464  
6.8387  
6.8357  
6.8323  
5.8271  
5.823  
5.2989  
5.2783

2.5993  
2.5387  
2.5331

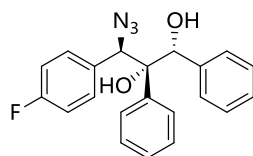

**4b**

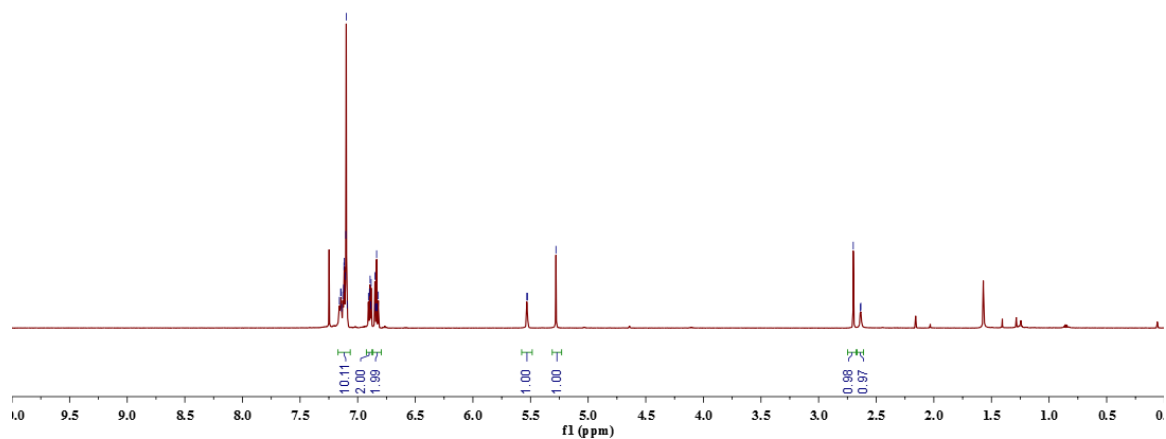

zzf181114-N3  
single pulse decoupled gated NOE

163.41  
161.78  
139.06  
138.24  
130.86  
130.82  
128.14  
128.08  
127.97  
127.43  
114.65  
80.08  
79.95  
69.74

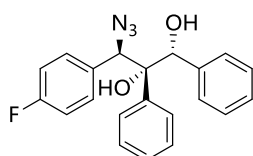

**4b**

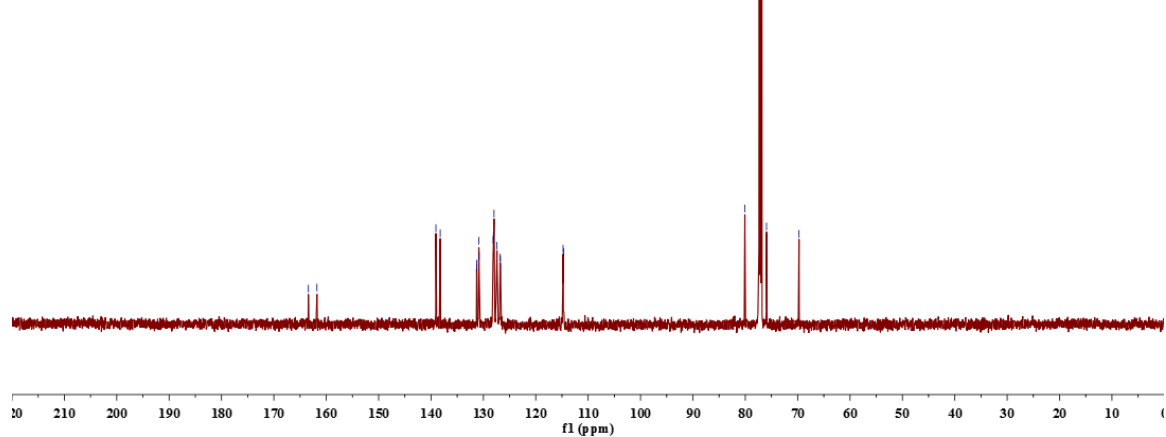





## VII. HPLC spectra for ee determination

### <Chromatogram>

mV

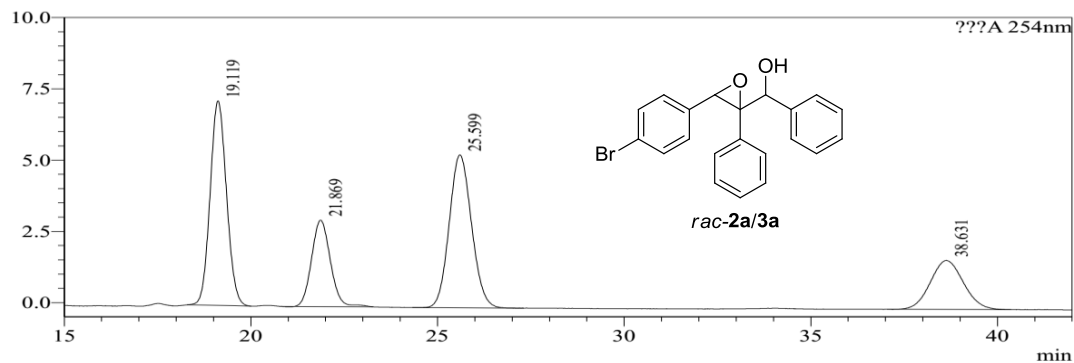

### <Peak Table>

???A 254nm

| Peak# | Ret. Time | Area   | Height | Conc.  | Unit | Mark | Name |
|-------|-----------|--------|--------|--------|------|------|------|
| 1     | 19.119    | 219108 | 7174   | 33.458 |      | M    |      |
| 2     | 21.869    | 106002 | 3029   | 16.187 |      | M    |      |
| 3     | 25.599    | 223470 | 5366   | 34.124 |      | M    |      |
| 4     | 38.631    | 106299 | 1718   | 16.232 |      | M    |      |
| Total |           | 654879 | 17288  |        |      |      |      |

### <Chromatogram>

mV

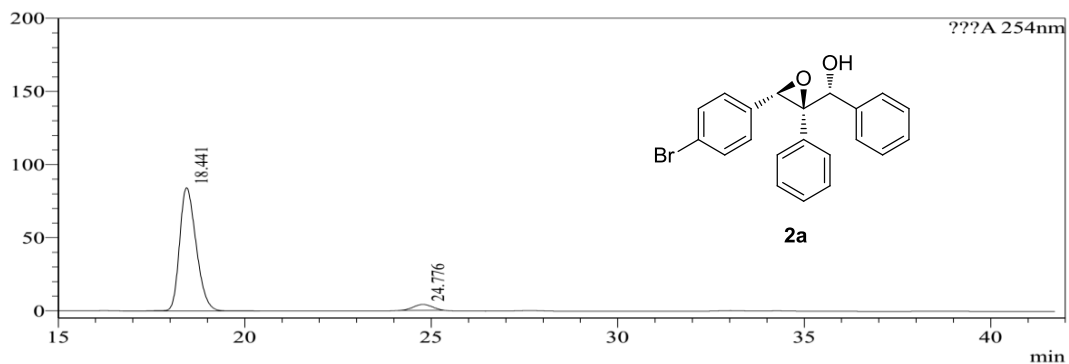

### <Peak Table>

???A 254nm

| Peak# | Ret. Time | Area    | Height | Conc.  | Unit | Mark | Name |
|-------|-----------|---------|--------|--------|------|------|------|
| 1     | 18.441    | 2611990 | 84313  | 94.853 |      | M    |      |
| 2     | 24.776    | 141732  | 4017   | 5.147  |      | M    |      |
| Total |           | 2753722 | 88330  |        |      |      |      |

### <Chromatogram>

mV

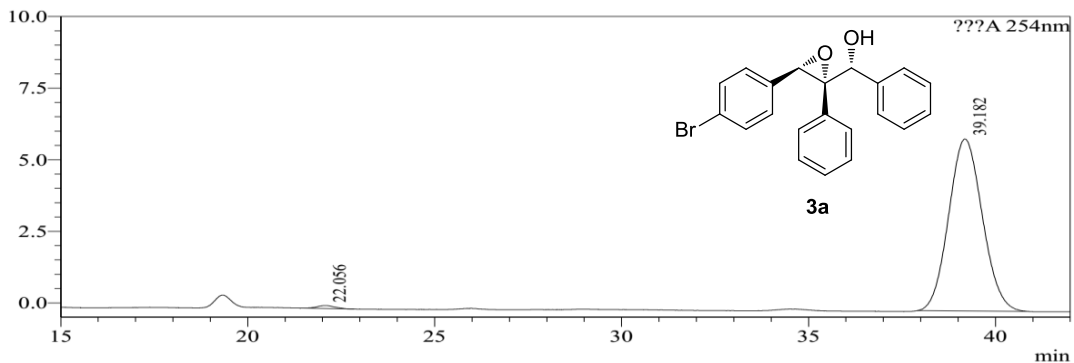

### <Peak Table>

???A 254nm

| Peak# | Ret. Time | Area   | Height | Conc.  | Unit | Mark | Name |
|-------|-----------|--------|--------|--------|------|------|------|
| 1     | 22.056    | 3458   | 103    | 0.909  |      | M    |      |
| 2     | 39.182    | 376934 | 6007   | 99.091 |      |      |      |
| Total |           | 380392 | 6110   |        |      |      |      |

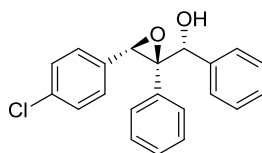

2b

# <Chromatogram>

mV

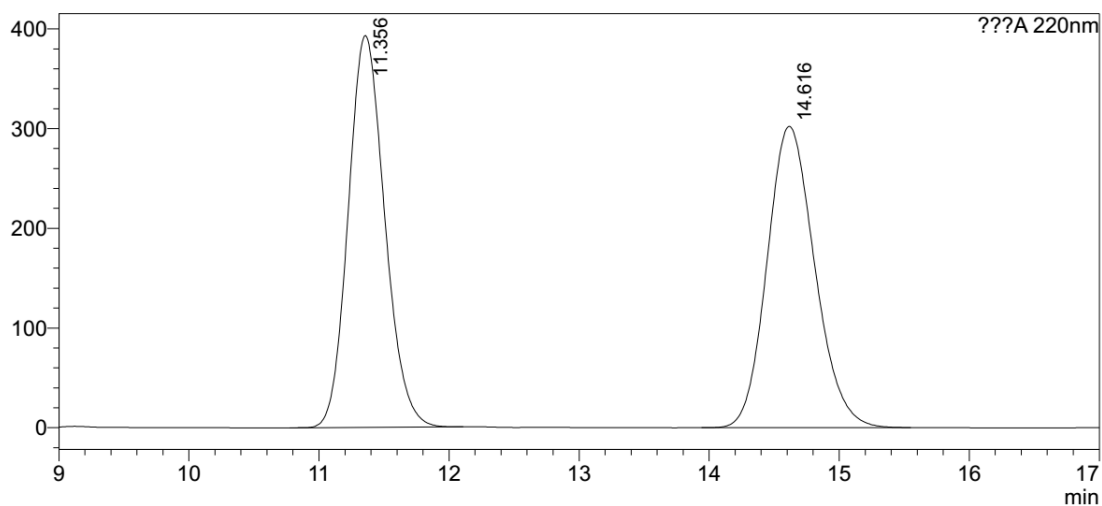

## <Peak Table>

???A 220nm

| Peak# | Ret. Time | Area     | Height | Conc.  | Unit | Mark | Name |
|-------|-----------|----------|--------|--------|------|------|------|
| 1     | 11.356    | 7661543  | 393042 | 49.873 |      | M    |      |
| 2     | 14.616    | 7700661  | 302395 | 50.127 |      | M    |      |
| Total |           | 15362205 | 695437 |        |      |      |      |

# <Chromatogram>

mV

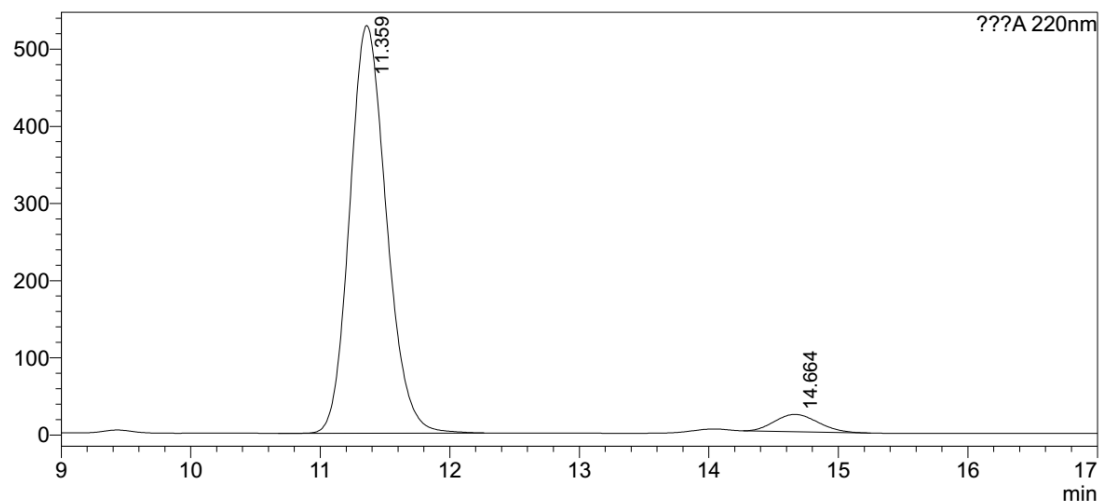

## <Peak Table>

???A 220nm

| Peak# | Ret. Time | Area     | Height | Conc.  | Unit | Mark | Name |
|-------|-----------|----------|--------|--------|------|------|------|
| 1     | 11.359    | 10413121 | 528467 | 95.189 |      | M    |      |
| 2     | 14.664    | 526292   | 22458  | 4.811  |      | M    |      |
| Total |           | 10939413 | 550925 |        |      |      |      |

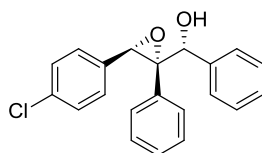

3b

# <Chromatogram>

mV

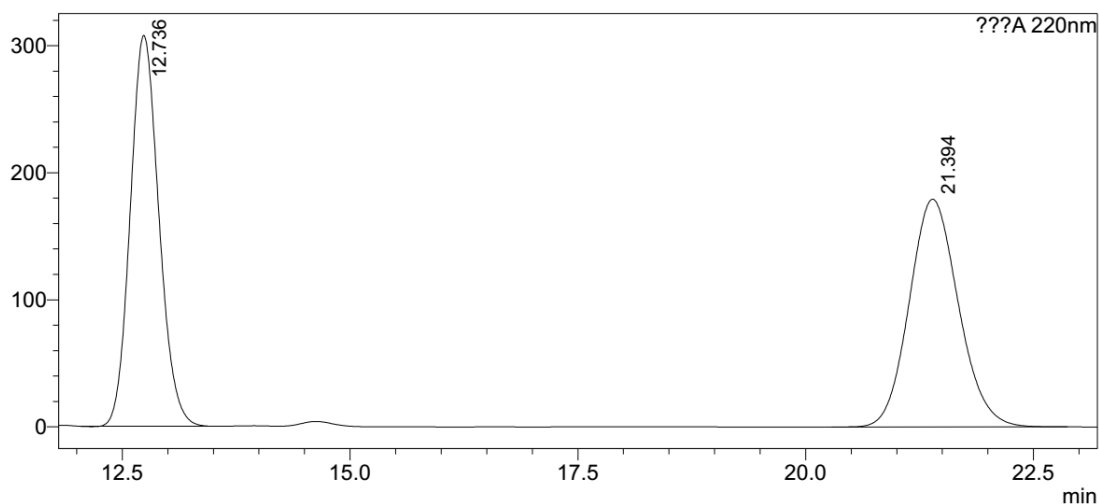

## <Peak Table>

???A 220nm

| Peak# | Ret. Time | Area     | Height | Conc.  | Unit | Mark | Name |
|-------|-----------|----------|--------|--------|------|------|------|
| 1     | 12.736    | 6726175  | 307668 | 50.004 |      | M    |      |
| 2     | 21.394    | 6725066  | 179315 | 49.996 |      | M    |      |
| Total |           | 13451241 | 486983 |        |      |      |      |

# <Chromatogram>

mV

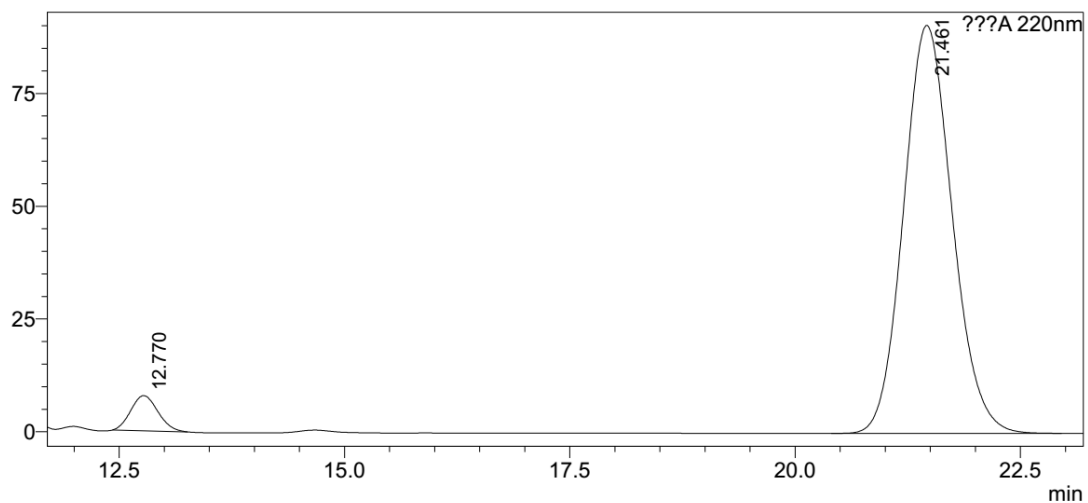

## <Peak Table>

???A 220nm

| Peak# | Ret. Time | Area    | Height | Conc.  | Unit | Mark | Name |
|-------|-----------|---------|--------|--------|------|------|------|
| 1     | 12.770    | 163013  | 7782   | 4.582  |      | M    |      |
| 2     | 21.461    | 3394424 | 90429  | 95.418 |      | M    |      |
| Total |           | 3557436 | 98211  |        |      |      |      |

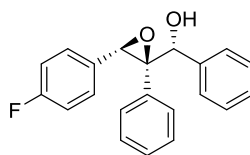

2c

### <Chromatogram>

mV

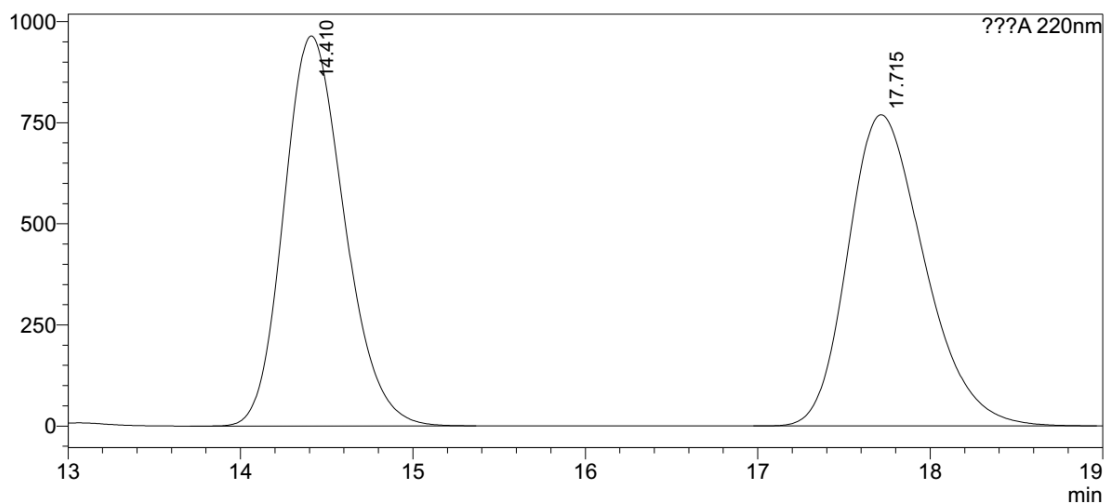

### <Peak Table>

???A 220nm

| Peak# | Ret. Time | Area     | Height  | Conc.  | Unit | Mark | Name |
|-------|-----------|----------|---------|--------|------|------|------|
| 1     | 14.410    | 23536389 | 964336  | 49.793 |      | M    |      |
| 2     | 17.715    | 23731635 | 769385  | 50.207 |      | M    |      |
| Total |           | 47268024 | 1733721 |        |      |      |      |

### <Chromatogram>

mV

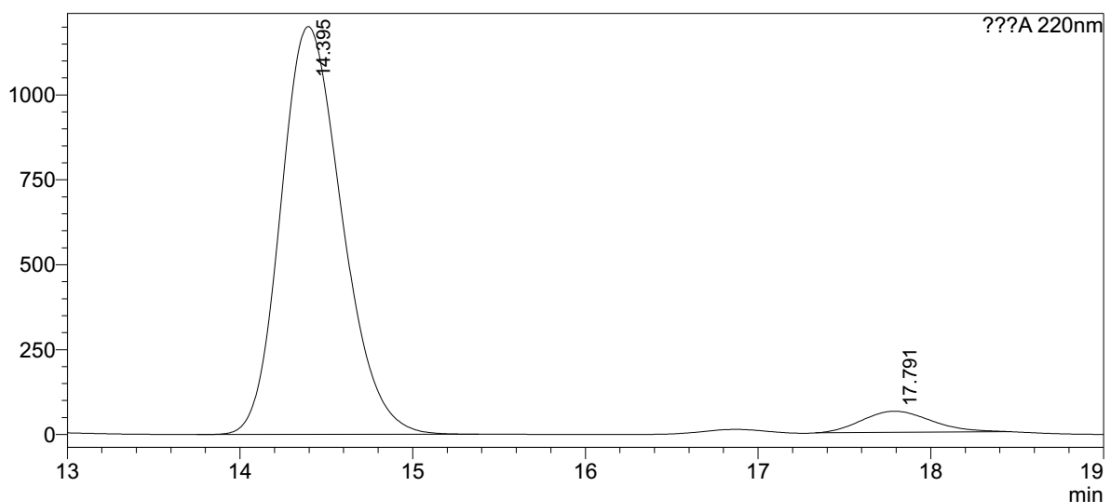

### <Peak Table>

???A 220nm

| Peak# | Ret. Time | Area     | Height  | Conc.  | Unit | Mark | Name |
|-------|-----------|----------|---------|--------|------|------|------|
| 1     | 14.395    | 29603986 | 1200910 | 94.395 |      | M    |      |
| 2     | 17.791    | 1757831  | 62392   | 5.605  |      | M    |      |
| Total |           | 31361817 | 1263302 |        |      |      |      |

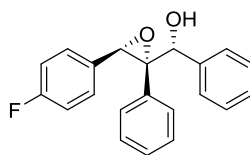

3c

### <Chromatogram>

mV

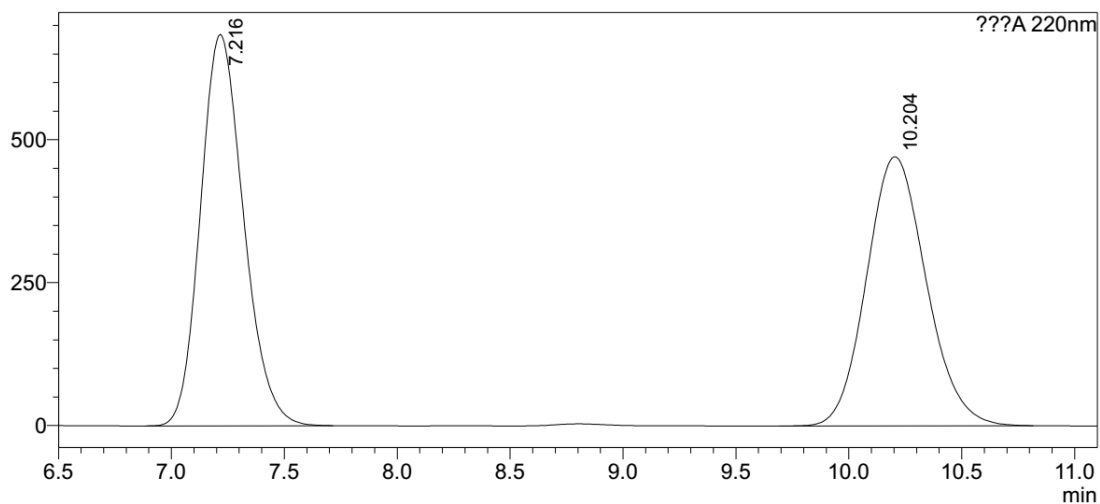

### <Peak Table>

???A 220nm

| Peak# | Ret. Time | Area     | Height  | Conc.  | Unit | Mark | Name |
|-------|-----------|----------|---------|--------|------|------|------|
| 1     | 7.216     | 9092209  | 684677  | 51.238 |      | M    |      |
| 2     | 10.204    | 8652988  | 470743  | 48.762 |      | M    |      |
| Total |           | 17745197 | 1155420 |        |      |      |      |

### <Chromatogram>

mV

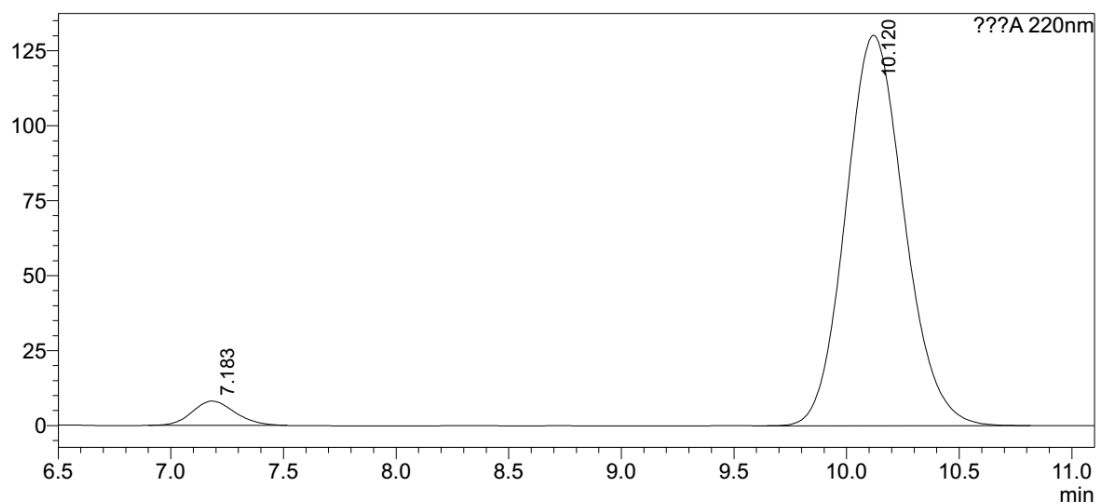

### <Peak Table>

???A 220nm

| Peak# | Ret. Time | Area    | Height | Conc.  | Unit | Mark | Name |
|-------|-----------|---------|--------|--------|------|------|------|
| 1     | 7.183     | 107548  | 8125   | 4.368  |      | M    |      |
| 2     | 10.120    | 2354834 | 130184 | 95.632 |      | M    |      |
| Total |           | 2462382 | 138308 |        |      |      |      |

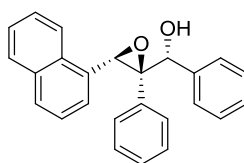

2d

### <Chromatogram>

mV

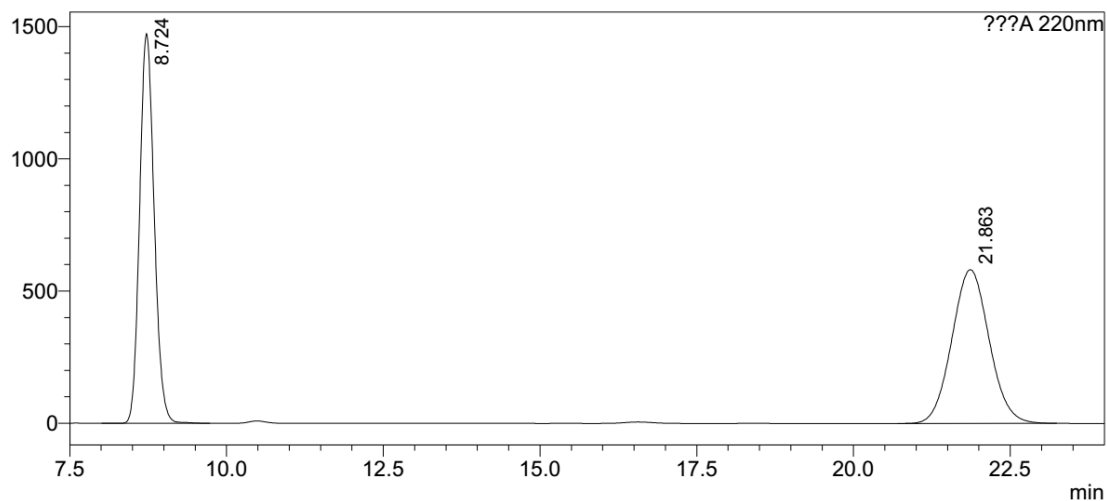

### <Peak Table>

???A 220nm

| Peak# | Ret. Time | Area     | Height  | Conc.  | Unit | Mark | Name |
|-------|-----------|----------|---------|--------|------|------|------|
| 1     | 8.724     | 23800414 | 1472978 | 49.713 |      | M    |      |
| 2     | 21.863    | 24075627 | 581331  | 50.287 |      | M    |      |
| Total |           | 47876042 | 2054308 |        |      |      |      |

### <Chromatogram>

mV

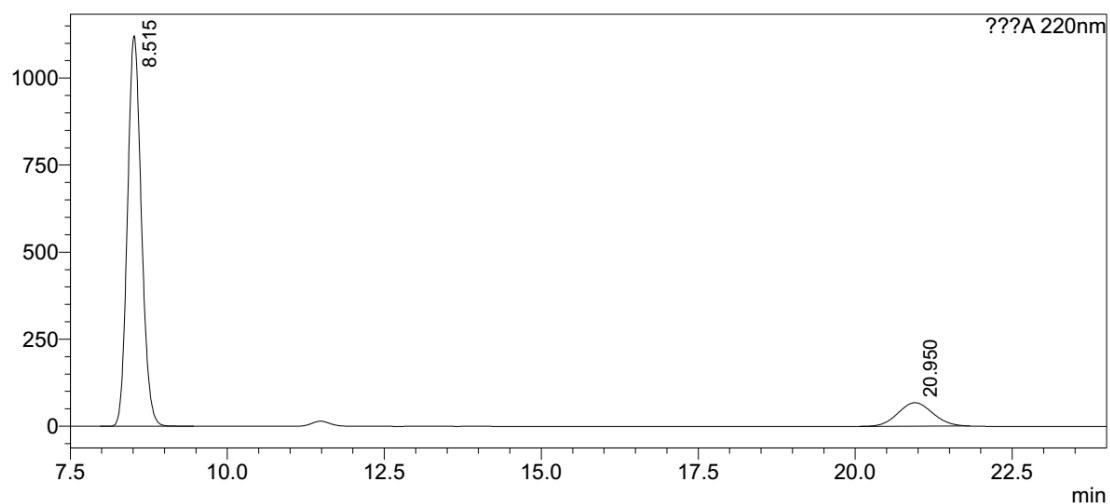

### <Peak Table>

???A 220nm

| Peak# | Ret. Time | Area     | Height  | Conc.  | Unit | Mark | Name |
|-------|-----------|----------|---------|--------|------|------|------|
| 1     | 8.515     | 17326555 | 1120669 | 86.929 |      | M    |      |
| 2     | 20.950    | 2605372  | 67423   | 13.071 |      | M    |      |
| Total |           | 19931926 | 1188092 |        |      |      |      |

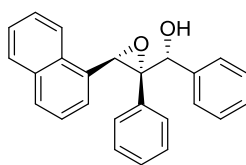

3d

### <Chromatogram>

mV

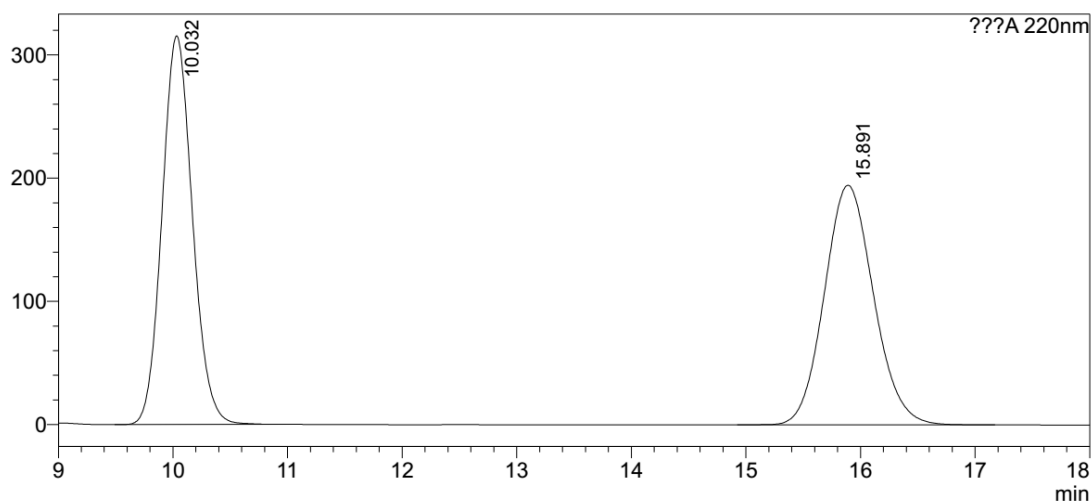

### <Peak Table>

???A 220nm

| Peak# | Ret. Time | Area     | Height | Conc.  | Unit | Mark | Name |
|-------|-----------|----------|--------|--------|------|------|------|
| 1     | 10.032    | 5822909  | 315519 | 50.092 |      | M    |      |
| 2     | 15.891    | 5801485  | 194483 | 49.908 |      | M    |      |
| Total |           | 11624394 | 510002 |        |      |      |      |

### <Chromatogram>

mV

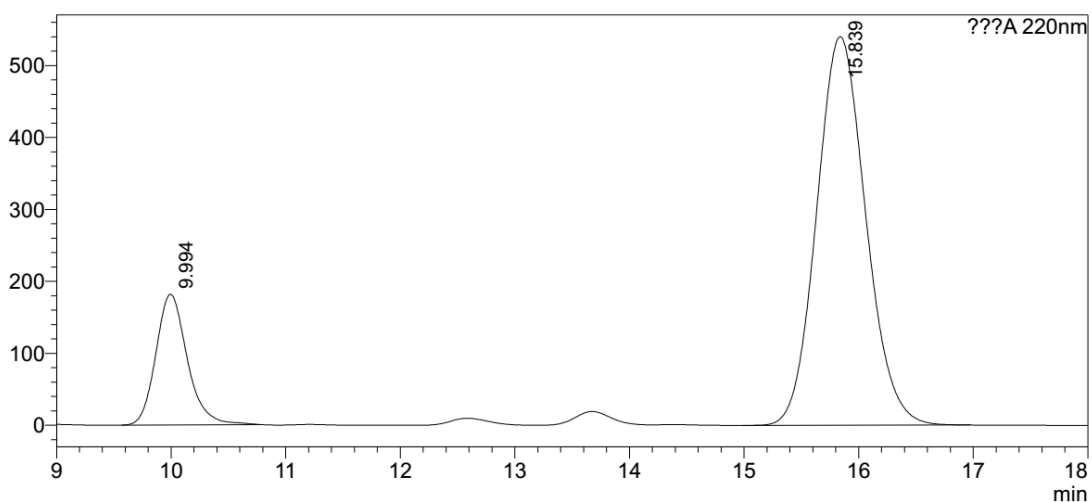

### <Peak Table>

???A 220nm

| Peak# | Ret. Time | Area     | Height | Conc.  | Unit | Mark | Name |
|-------|-----------|----------|--------|--------|------|------|------|
| 1     | 9.994     | 3462413  | 181667 | 17.711 |      | M    |      |
| 2     | 15.839    | 16086628 | 540070 | 82.289 |      | M    |      |
| Total |           | 19549040 | 721738 |        |      |      |      |



# <Chromatogram>

mV

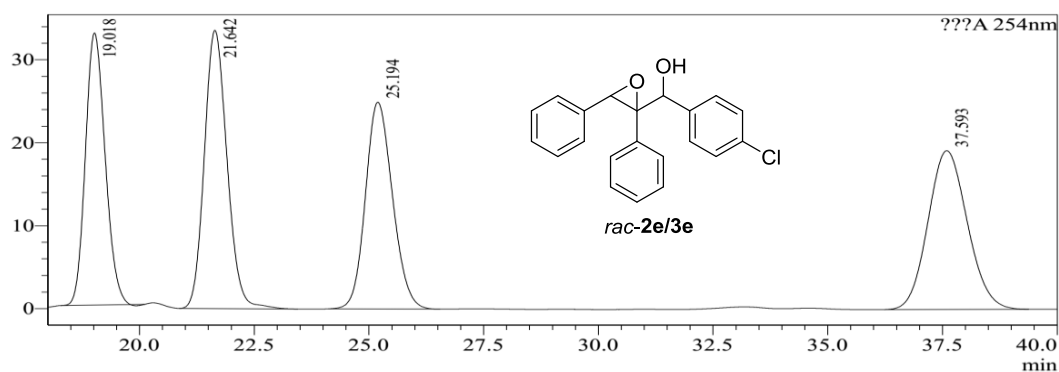

## <Peak Table>

???A 254nm

| Peak# | Ret. Time | Area    | Height | Conc.  | Unit | Mark | Name |
|-------|-----------|---------|--------|--------|------|------|------|
| 1     | 19.018    | 981427  | 32804  | 22.809 |      | M    |      |
| 2     | 21.642    | 1155451 | 33556  | 26.854 |      |      |      |
| 3     | 25.194    | 1024659 | 24938  | 23.814 |      |      |      |
| 4     | 37.593    | 1141250 | 19141  | 26.524 |      |      |      |
| Total |           | 4302787 | 110439 |        |      |      |      |

# <Chromatogram>

mV

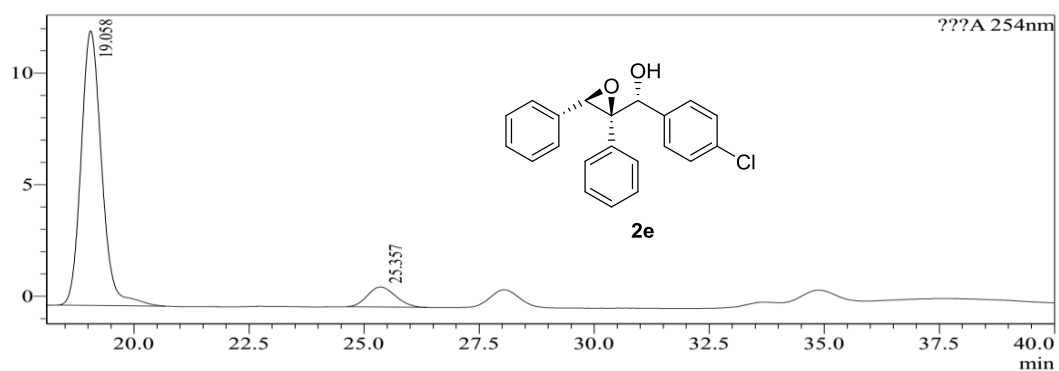

## <Peak Table>

???A 254nm

| Peak# | Ret. Time | Area   | Height | Conc.  | Unit | Mark | Name |
|-------|-----------|--------|--------|--------|------|------|------|
| 1     | 19.058    | 382687 | 12312  | 90.959 |      |      |      |
| 2     | 25.357    | 38037  | 899    | 9.041  |      |      |      |
| Total |           | 420724 | 13211  |        |      |      |      |

# <Chromatogram>

mV

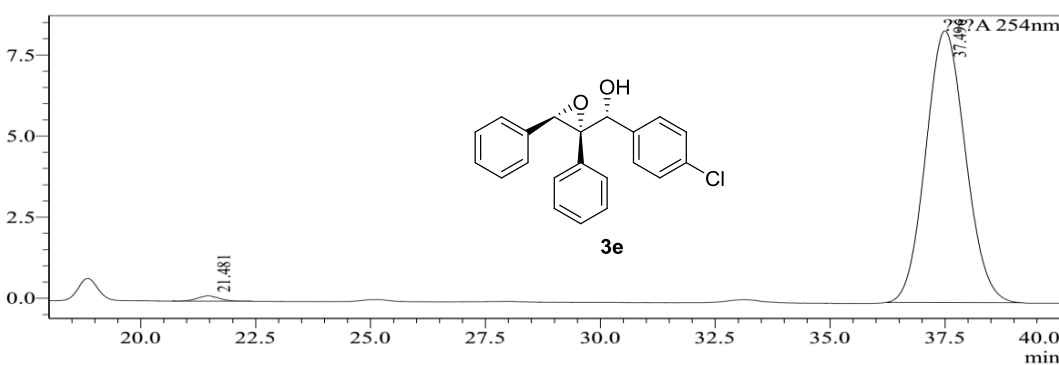

## <Peak Table>

???A 254nm

| Peak# | Ret. Time | Area   | Height | Conc.  | Unit | Mark | Name |
|-------|-----------|--------|--------|--------|------|------|------|
| 1     | 21.481    | 5251   | 158    | 1.028  |      | M    |      |
| 2     | 37.496    | 505682 | 8381   | 98.972 |      |      |      |
| Total |           | 510933 | 8539   |        |      |      |      |

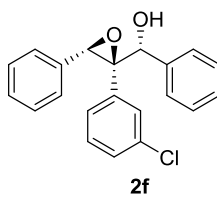

### <Chromatogram>

mV

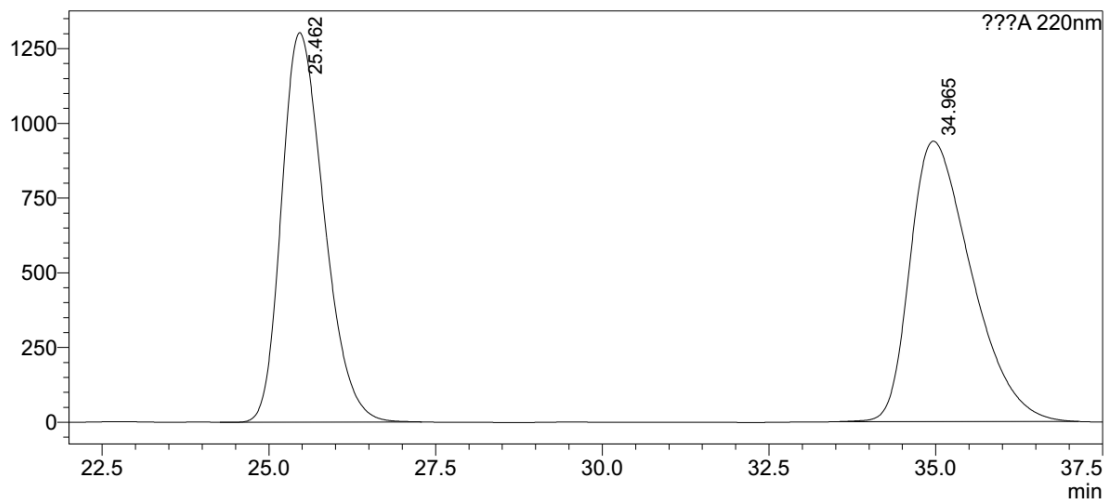

### <Peak Table>

???A 220nm

| Peak# | Ret. Time | Area      | Height  | Conc.  | Unit | Mark | Name |
|-------|-----------|-----------|---------|--------|------|------|------|
| 1     | 25.462    | 57744367  | 1302569 | 49.036 |      | M    |      |
| 2     | 34.965    | 60014746  | 938444  | 50.964 |      | M    |      |
| Total |           | 117759112 | 2241012 |        |      |      |      |

### <Chromatogram>

mV

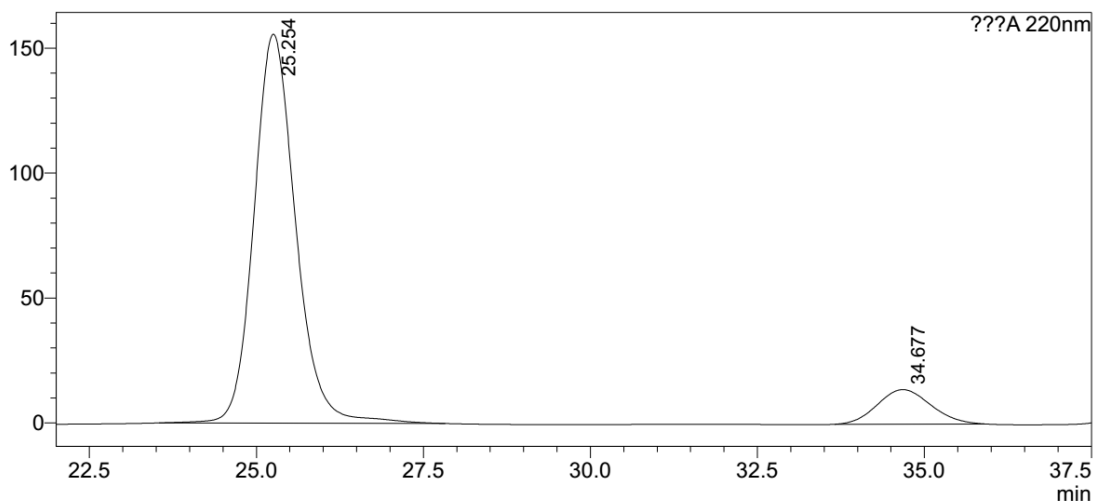

### <Peak Table>

???A 220nm

| Peak# | Ret. Time | Area    | Height | Conc.  | Unit | Mark | Name |
|-------|-----------|---------|--------|--------|------|------|------|
| 1     | 25.254    | 6761392 | 155664 | 89.775 |      | M    |      |
| 2     | 34.677    | 770085  | 13820  | 10.225 |      | M    |      |
| Total |           | 7531477 | 169484 |        |      |      |      |

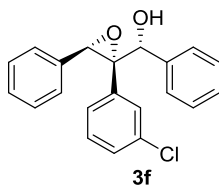

### <Chromatogram>

mV

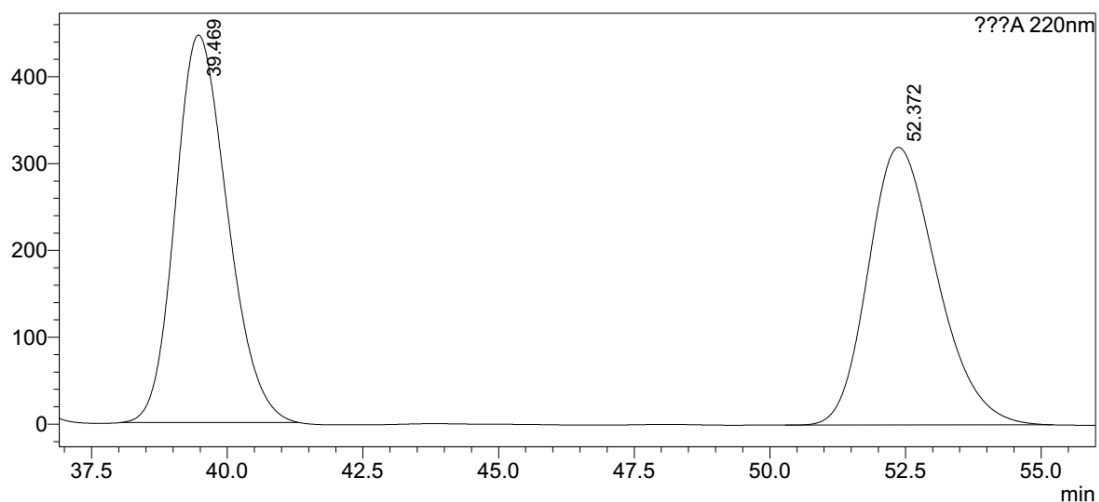

### <Peak Table>

???A 220nm

| Peak# | Ret. Time | Area     | Height | Conc.  | Unit | Mark | Name |
|-------|-----------|----------|--------|--------|------|------|------|
| 1     | 39.469    | 29934141 | 446051 | 51.426 |      | M    |      |
| 2     | 52.372    | 28273778 | 319583 | 48.574 |      | M    |      |
| Total |           | 58207918 | 765634 |        |      |      |      |

### <Chromatogram>

mV

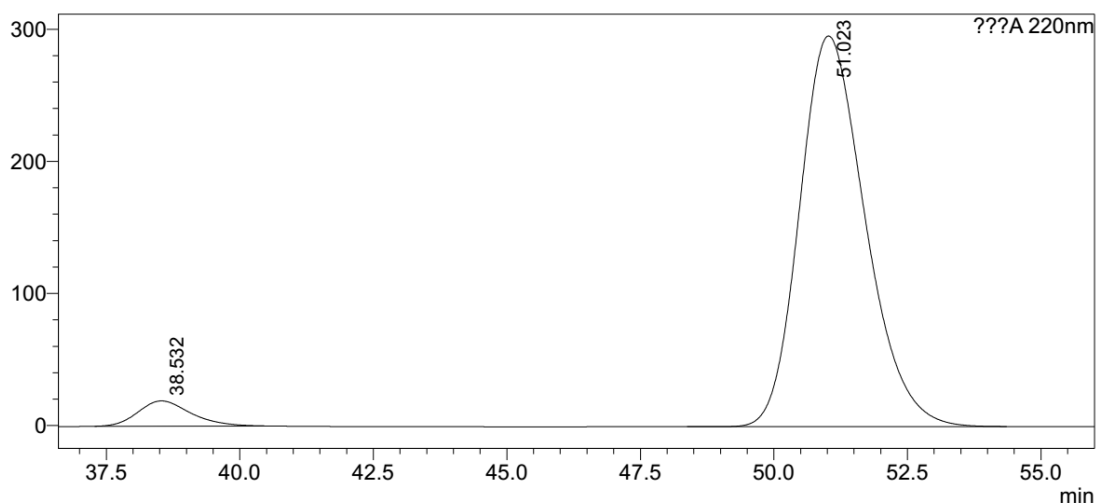

### <Peak Table>

???A 220nm

| Peak# | Ret. Time | Area     | Height | Conc.  | Unit | Mark | Name |
|-------|-----------|----------|--------|--------|------|------|------|
| 1     | 38.532    | 1308350  | 19095  | 4.922  |      | M    |      |
| 2     | 51.023    | 25273713 | 295687 | 95.078 |      | M    |      |
| Total |           | 26582063 | 314782 |        |      |      |      |

# <Chromatogram>

mV

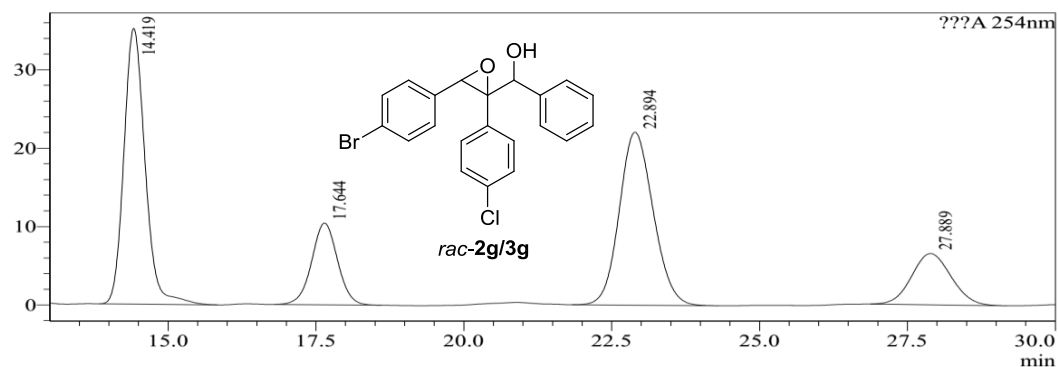

## <Peak Table>

???A 254nm

| Peak# | Ret. Time | Area    | Height | Conc.  | Unit | Mark | Name |
|-------|-----------|---------|--------|--------|------|------|------|
| 1     | 14.419    | 875622  | 35172  | 36.836 |      |      |      |
| 2     | 17.644    | 317166  | 10413  | 13.343 |      |      |      |
| 3     | 22.894    | 880474  | 22055  | 37.040 |      |      |      |
| 4     | 27.889    | 303804  | 6533   | 12.781 |      |      |      |
| Total |           | 2377066 | 74172  |        |      |      |      |

# <Chromatogram>

mV

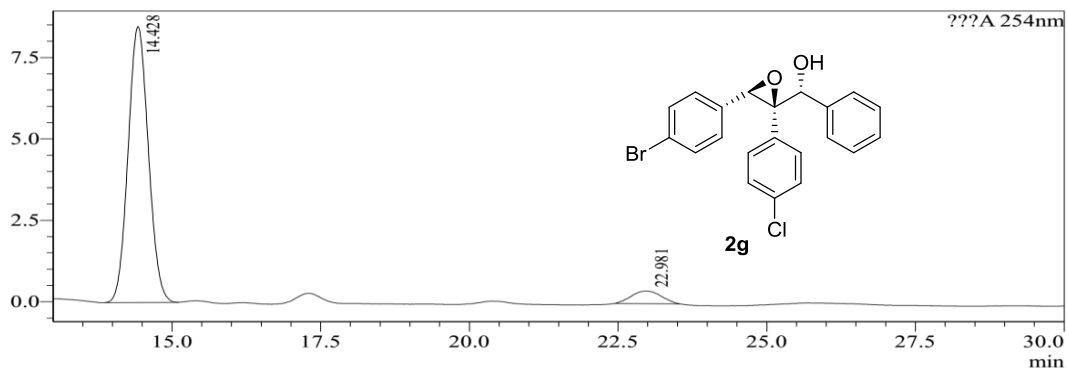

## <Peak Table>

???A 254nm

| Peak# | Ret. Time | Area   | Height | Conc.  | Unit | Mark | Name |
|-------|-----------|--------|--------|--------|------|------|------|
| 1     | 14.428    | 201048 | 8471   | 93.705 |      |      |      |
| 2     | 22.981    | 13506  | 393    | 6.295  |      | M    |      |
| Total |           | 214554 | 8863   |        |      |      |      |

# <Chromatogram>

mV

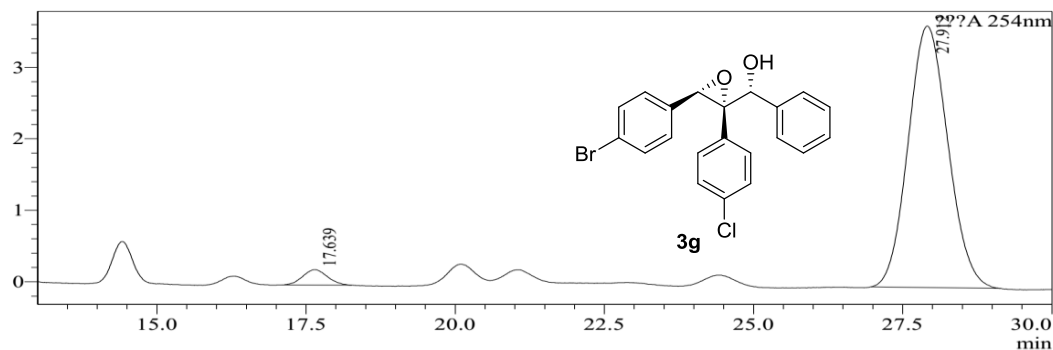

## <Peak Table>

???A 254nm

| Peak# | Ret. Time | Area   | Height | Conc.  | Unit | Mark | Name |
|-------|-----------|--------|--------|--------|------|------|------|
| 1     | 17.639    | 6123   | 214    | 3.479  |      | M    |      |
| 2     | 27.912    | 169885 | 3659   | 96.521 |      |      |      |
| Total |           | 176007 | 3873   |        |      |      |      |

# <Chromatogram>

mV

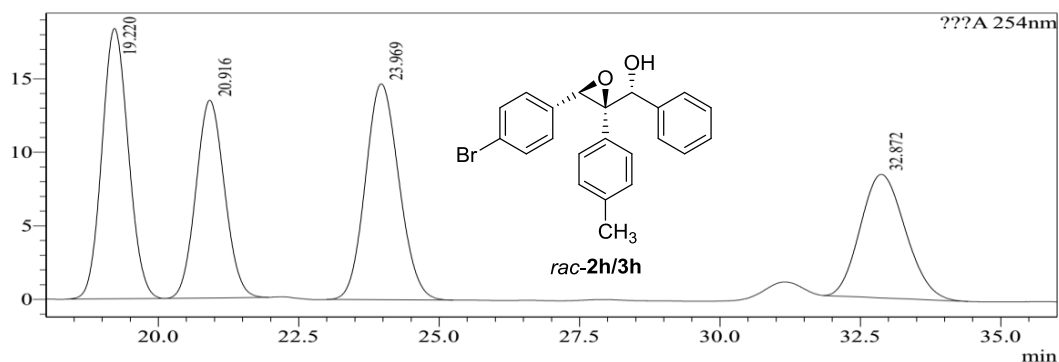

## <Peak Table>

???A 254nm

| Peak# | Ret. Time | Area    | Height | Conc.  | Unit | Mark | Name |
|-------|-----------|---------|--------|--------|------|------|------|
| 1     | 19.220    | 603120  | 18385  | 27.886 |      |      |      |
| 2     | 20.916    | 476788  | 13446  | 22.045 |      |      |      |
| 3     | 23.969    | 612659  | 14686  | 28.327 |      |      |      |
| 4     | 32.872    | 470223  | 8397   | 21.742 |      |      |      |
| Total |           | 2162790 | 54913  |        |      |      |      |

# <Chromatogram>

mV

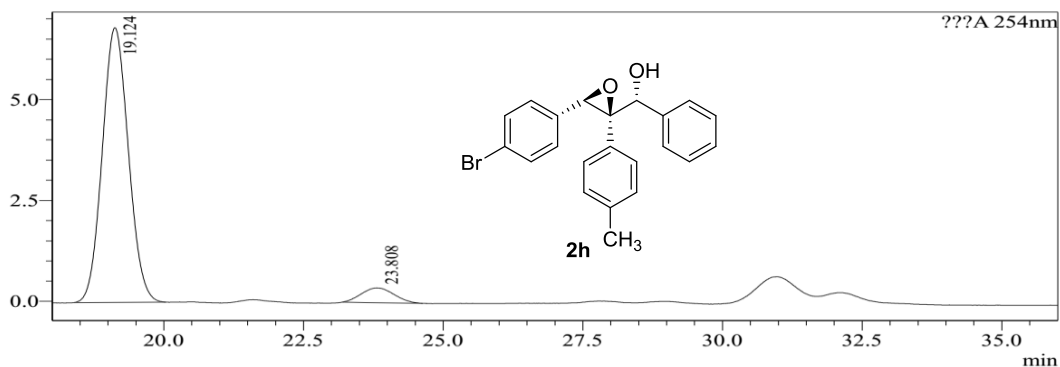

## <Peak Table>

???A 254nm

| Peak# | Ret. Time | Area   | Height | Conc.  | Unit | Mark | Name |
|-------|-----------|--------|--------|--------|------|------|------|
| 1     | 19.124    | 221151 | 6808   | 93.788 |      |      |      |
| 2     | 23.808    | 14648  | 364    | 6.212  |      |      |      |
| Total |           | 235800 | 7172   |        |      |      |      |

# <Chromatogram>

mV

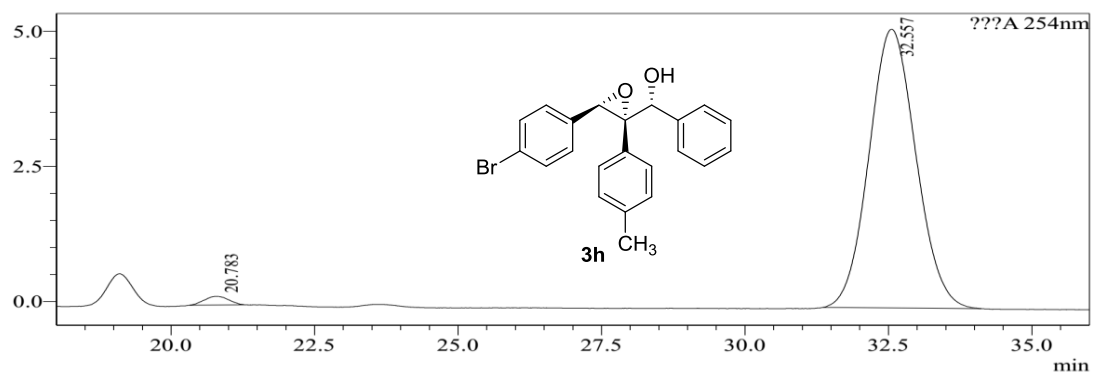

## <Peak Table>

???A 254nm

| Peak# | Ret. Time | Area   | Height | Conc.  | Unit | Mark | Name |
|-------|-----------|--------|--------|--------|------|------|------|
| 1     | 20.783    | 4816   | 163    | 1.612  |      |      |      |
| 2     | 32.557    | 293866 | 5162   | 98.388 |      |      |      |
| Total |           | 298682 | 5325   |        |      |      |      |

# <Chromatogram>

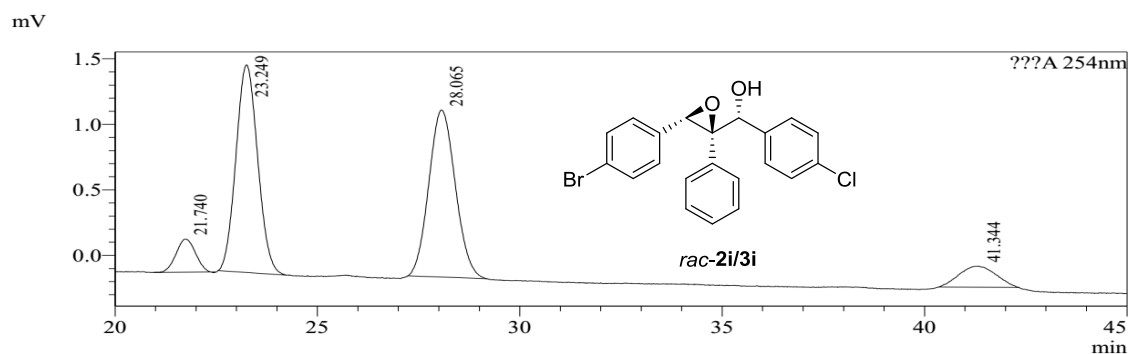

## <Peak Table>

??A 254nm

| Peak# | Ret. Time | Area   | Height | Conc.  | Unit | Mark | Name |
|-------|-----------|--------|--------|--------|------|------|------|
| 1     | 21.740    | 8387   | 252    | 6.165  |      | M    |      |
| 2     | 23.249    | 59322  | 1586   | 43.606 |      |      |      |
| 3     | 28.065    | 58108  | 1276   | 42.713 |      |      |      |
| 4     | 41.344    | 10226  | 162    | 7.517  |      | M    |      |
| Total |           | 136043 | 3275   |        |      |      |      |

# <Chromatogram>

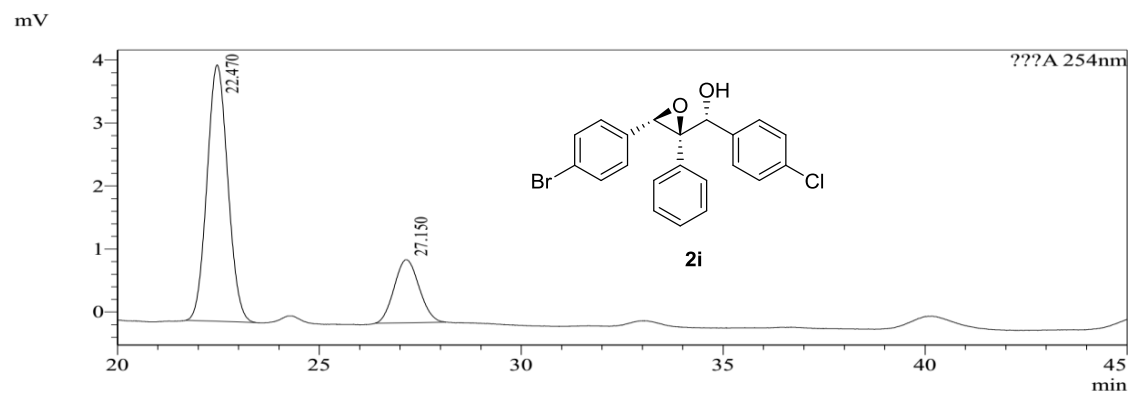

## <Peak Table>

??A 254nm

| Peak# | Ret. Time | Area   | Height | Conc.  | Unit | Mark | Name |
|-------|-----------|--------|--------|--------|------|------|------|
| 1     | 22.470    | 145827 | 4068   | 77.236 |      |      |      |
| 2     | 27.150    | 42979  | 1002   | 22.764 |      |      |      |
| Total |           | 188806 | 5069   |        |      |      |      |

# <Chromatogram>

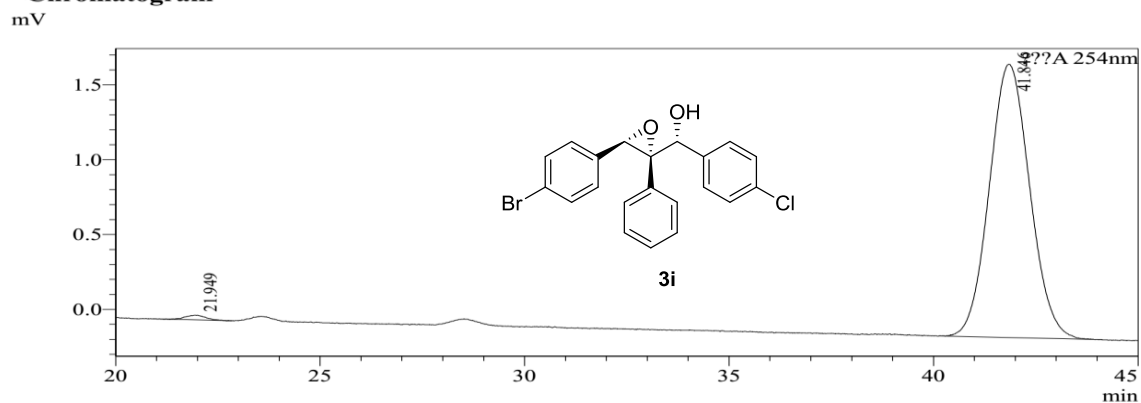

## <Peak Table>

??A 254nm

| Peak# | Ret. Time | Area   | Height | Conc.  | Unit | Mark | Name |
|-------|-----------|--------|--------|--------|------|------|------|
| 1     | 21.949    | 1113   | 31     | 0.879  |      | M    |      |
| 2     | 41.846    | 125601 | 1827   | 99.121 |      | M    |      |
| Total |           | 126715 | 1858   |        |      |      |      |

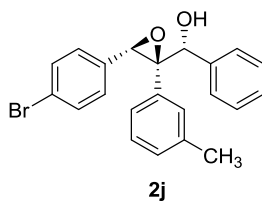

### <Chromatogram>

mV

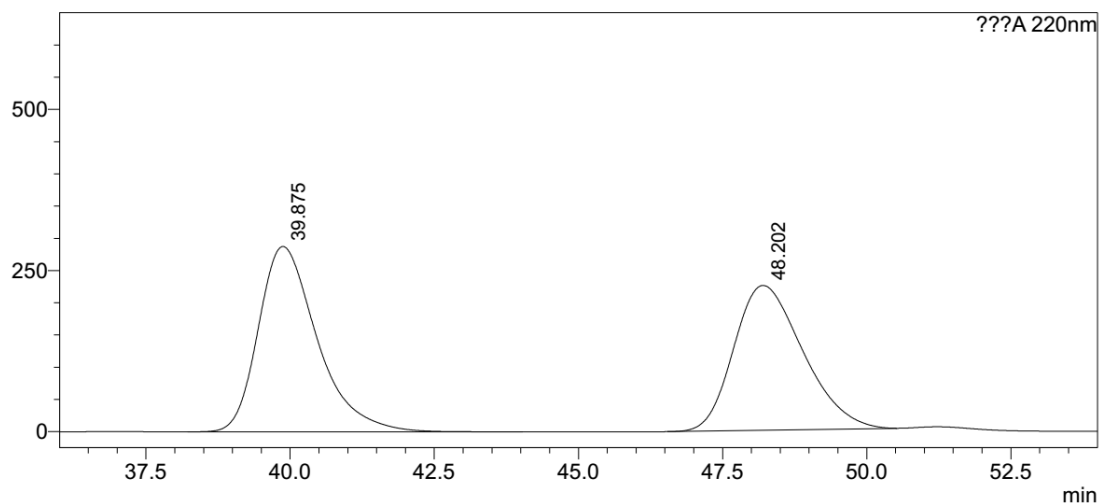

### <Peak Table>

???A 220nm

| Peak# | Ret. Time | Area     | Height | Conc.  | Unit | Mark | Name |
|-------|-----------|----------|--------|--------|------|------|------|
| 1     | 39.875    | 20404430 | 287560 | 52.076 |      |      |      |
| 2     | 48.202    | 18777345 | 224728 | 47.924 |      |      |      |
| Total |           | 39181775 | 512287 |        |      |      |      |

### <Chromatogram>

mV

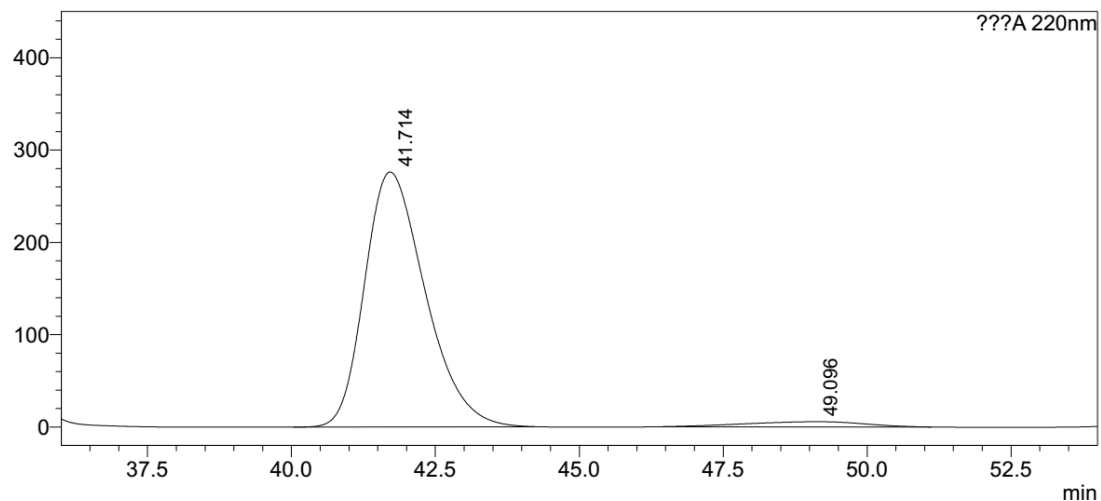

### <Peak Table>

???A 220nm

| Peak# | Ret. Time | Area     | Height | Conc.  | Unit | Mark | Name |
|-------|-----------|----------|--------|--------|------|------|------|
| 1     | 41.714    | 20269361 | 276178 | 96.054 |      | M    |      |
| 2     | 49.096    | 832691   | 5711   | 3.946  |      | M    |      |
| Total |           | 21102052 | 281889 |        |      |      |      |

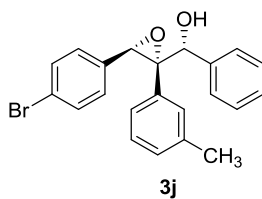

### <Chromatogram>

mV

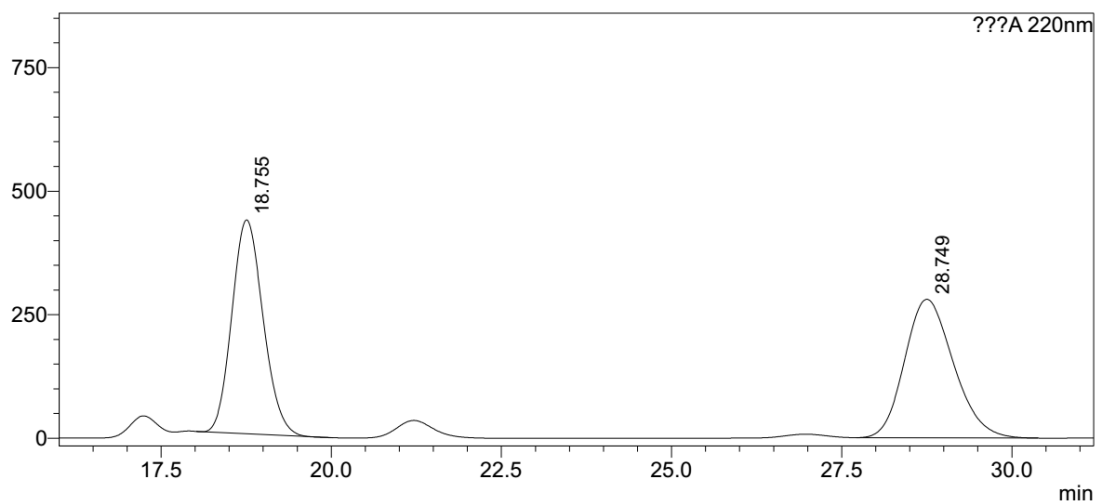

### <Peak Table>

???A 220nm

| Peak# | Ret. Time | Area     | Height | Conc.  | Unit | Mark | Name |
|-------|-----------|----------|--------|--------|------|------|------|
| 1     | 18.755    | 13835624 | 432832 | 49.684 |      | M    |      |
| 2     | 28.749    | 14011471 | 280440 | 50.316 |      | M    |      |
| Total |           | 27847095 | 713272 |        |      |      |      |

### <Chromatogram>

mV

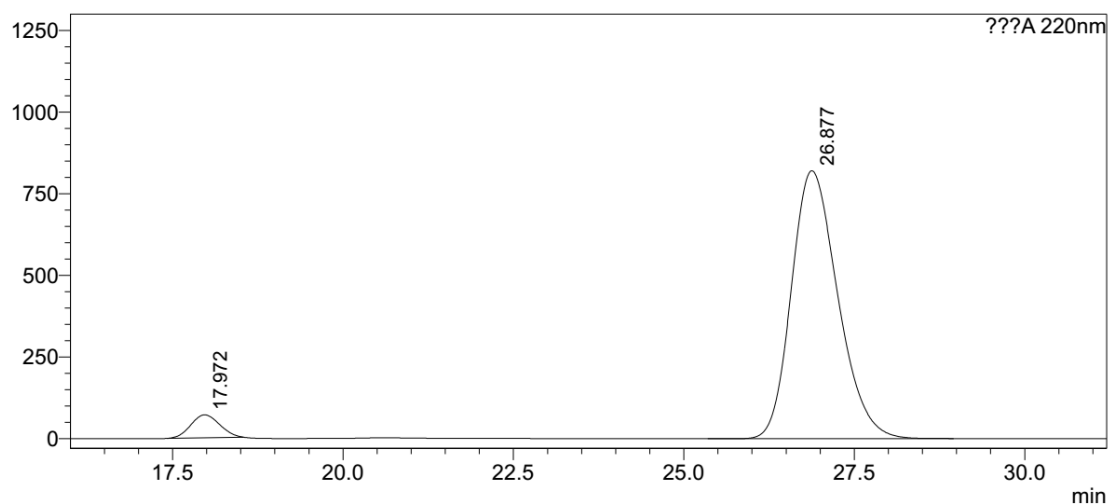

### <Peak Table>

???A 220nm

| Peak# | Ret. Time | Area     | Height | Conc.  | Unit | Mark | Name |
|-------|-----------|----------|--------|--------|------|------|------|
| 1     | 17.972    | 2070804  | 70290  | 5.063  |      | M    |      |
| 2     | 26.877    | 38830202 | 820576 | 94.937 |      | M    |      |
| Total |           | 40901006 | 890865 |        |      |      |      |



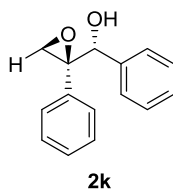

### <Chromatogram>

mV

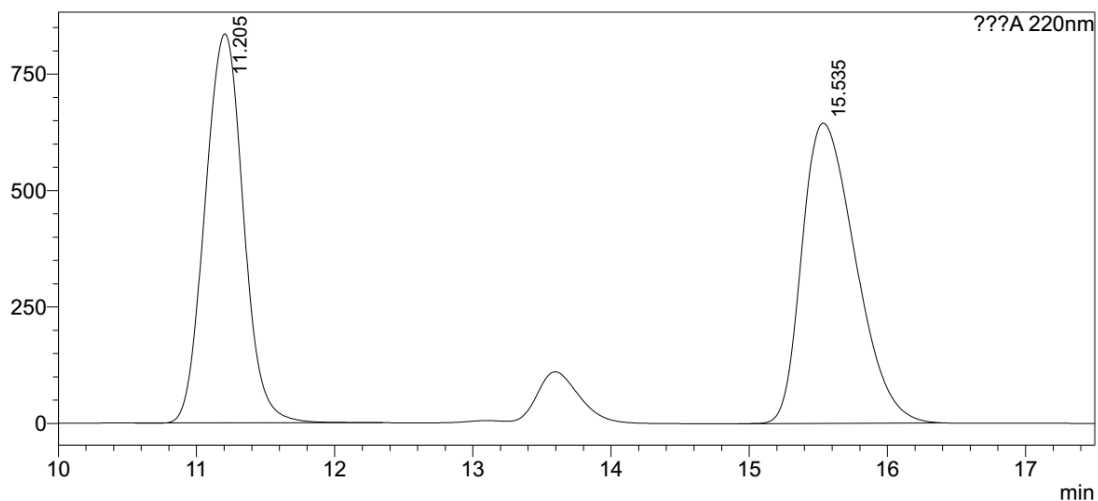

### <Peak Table>

???A 220nm

| Peak# | Ret. Time | Area     | Height  | Conc.  | Unit | Mark | Name |
|-------|-----------|----------|---------|--------|------|------|------|
| 1     | 11.205    | 16114237 | 835303  | 48.170 |      | M    |      |
| 2     | 15.535    | 17338726 | 645002  | 51.830 |      | M    |      |
| Total |           | 33452963 | 1480305 |        |      |      |      |

### <Chromatogram>

mV

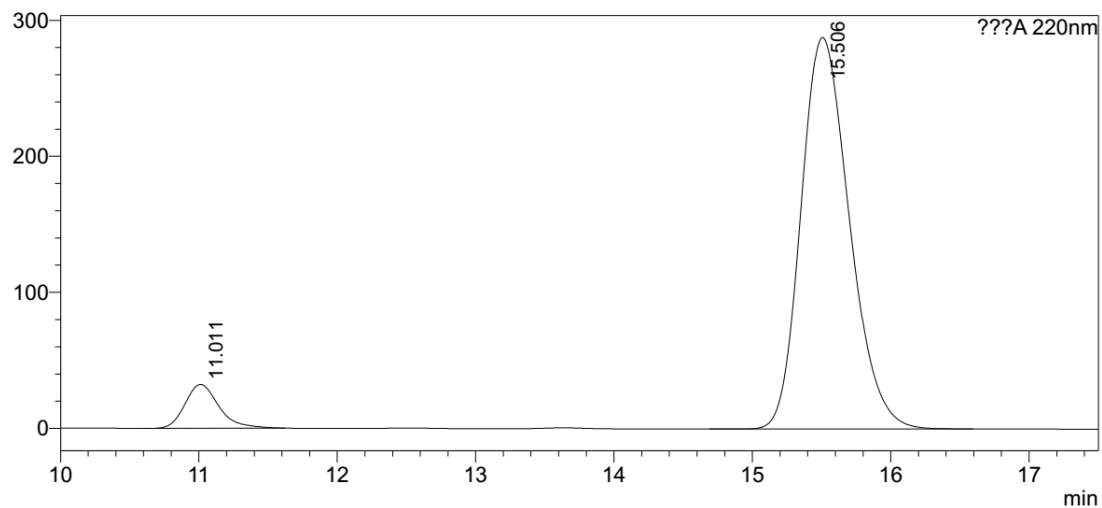

### <Peak Table>

???A 220nm

| Peak# | Ret. Time | Area    | Height | Conc.  | Unit | Mark | Name |
|-------|-----------|---------|--------|--------|------|------|------|
| 1     | 11.011    | 548169  | 32192  | 7.270  |      | M    |      |
| 2     | 15.506    | 6992472 | 287787 | 92.730 |      | M    |      |
| Total |           | 7540640 | 319979 |        |      |      |      |

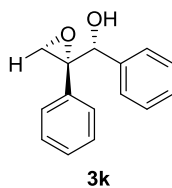

### <Chromatogram>

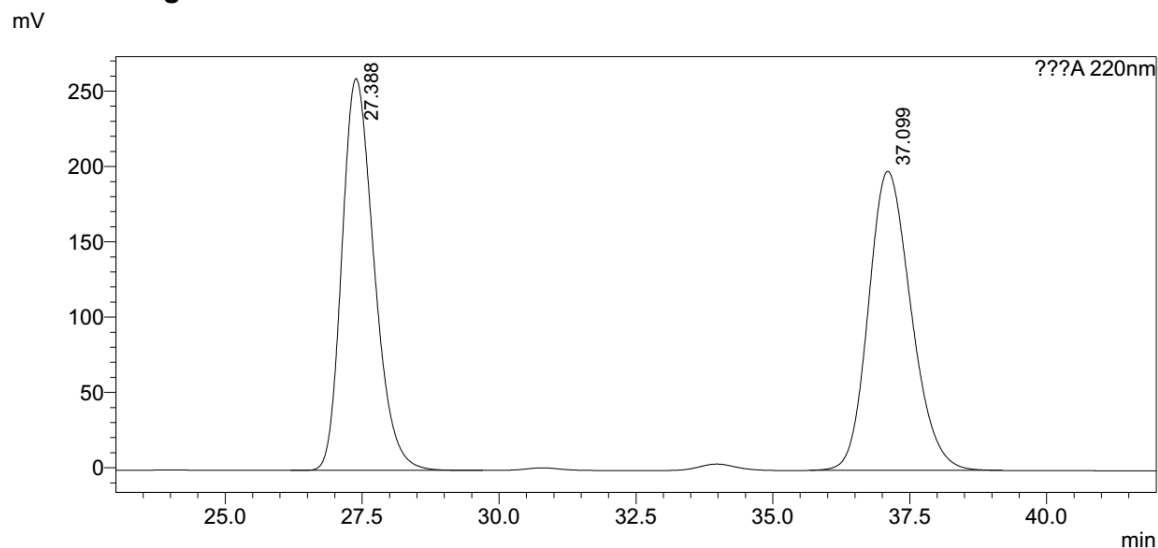

### <Peak Table>

???A 220nm

| Peak# | Ret. Time | Area     | Height | Conc.  | Unit | Mark | Name |
|-------|-----------|----------|--------|--------|------|------|------|
| 1     | 27.388    | 10616895 | 260055 | 49.690 |      | M    |      |
| 2     | 37.099    | 10749440 | 198544 | 50.310 |      | M    |      |
| Total |           | 21366335 | 458599 |        |      |      |      |

### <Chromatogram>

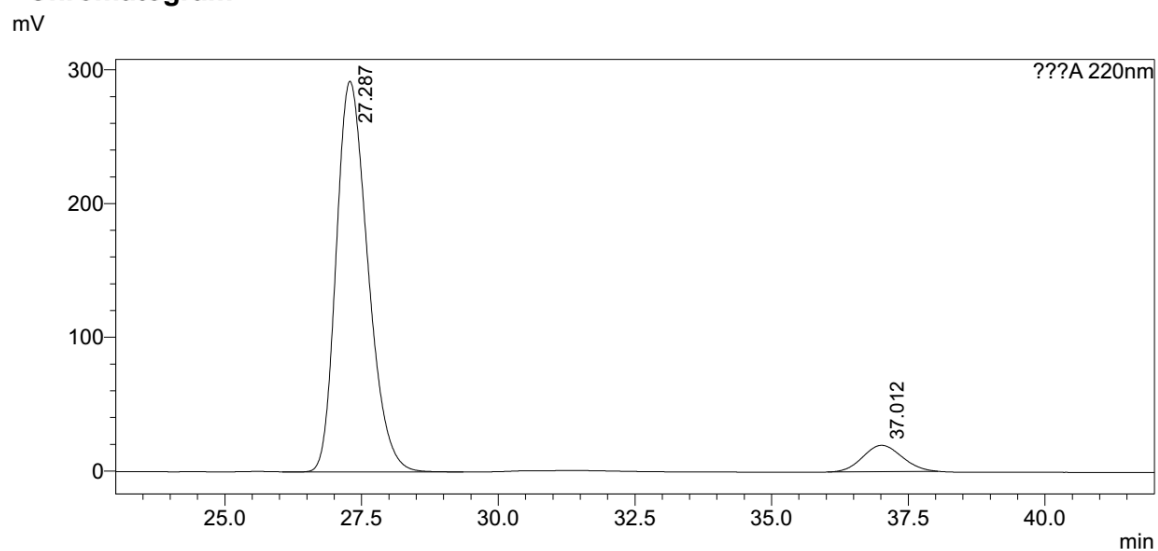

### <Peak Table>

???A 220nm

| Peak# | Ret. Time | Area     | Height | Conc.  | Unit | Mark | Name |
|-------|-----------|----------|--------|--------|------|------|------|
| 1     | 27.287    | 11733996 | 292015 | 92.267 |      | M    |      |
| 2     | 37.012    | 983381   | 19680  | 7.733  |      | M    |      |
| Total |           | 12717377 | 311695 |        |      |      |      |

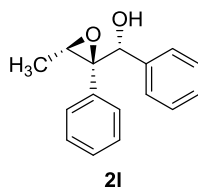

### <Chromatogram>

mV

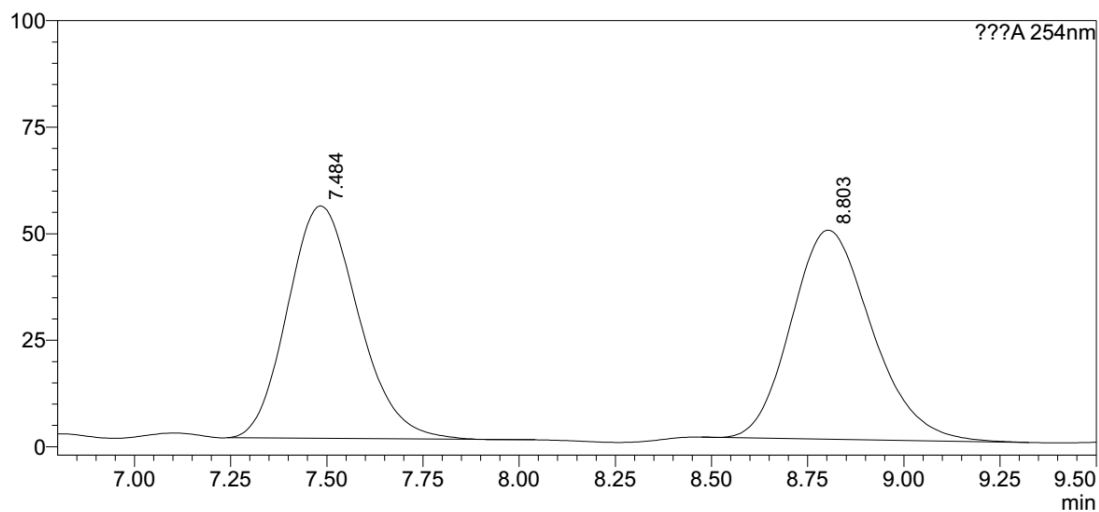

### <Peak Table>

???A 254nm

| Peak# | Ret. Time | Area    | Height | Conc.  | Unit | Mark | Name |
|-------|-----------|---------|--------|--------|------|------|------|
| 1     | 7.484     | 697049  | 54608  | 49.371 |      | M    |      |
| 2     | 8.803     | 714817  | 49051  | 50.629 |      | M    |      |
| Total |           | 1411867 | 103659 |        |      |      |      |

### <Chromatogram>

mV

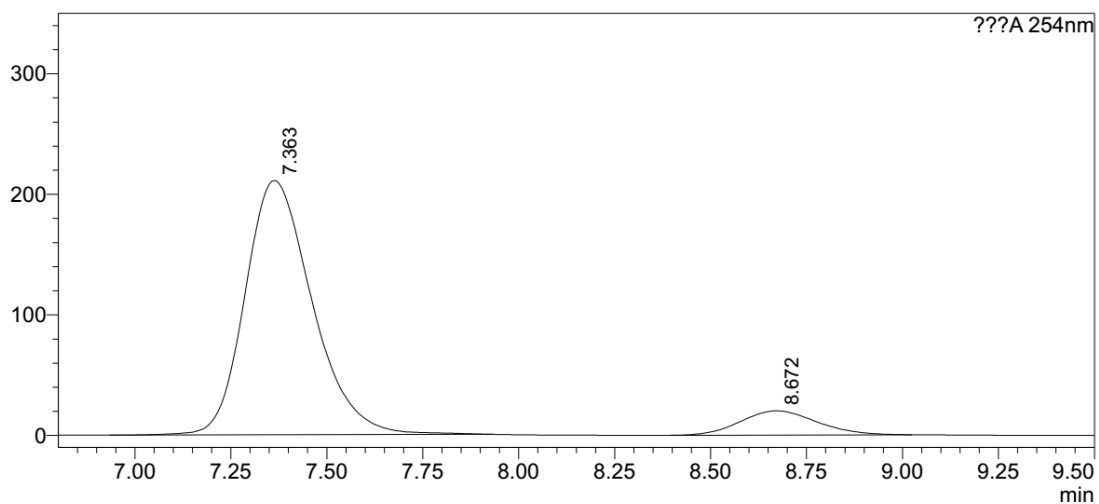

### <Peak Table>

???A 254nm

| Peak# | Ret. Time | Area    | Height | Conc.  | Unit | Mark | Name |
|-------|-----------|---------|--------|--------|------|------|------|
| 1     | 7.363     | 2570132 | 210869 | 90.231 |      | M    |      |
| 2     | 8.672     | 278272  | 20066  | 9.769  |      | M    |      |
| Total |           | 2848404 | 230936 |        |      |      |      |

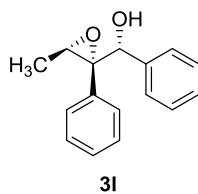

### <Chromatogram>

mV

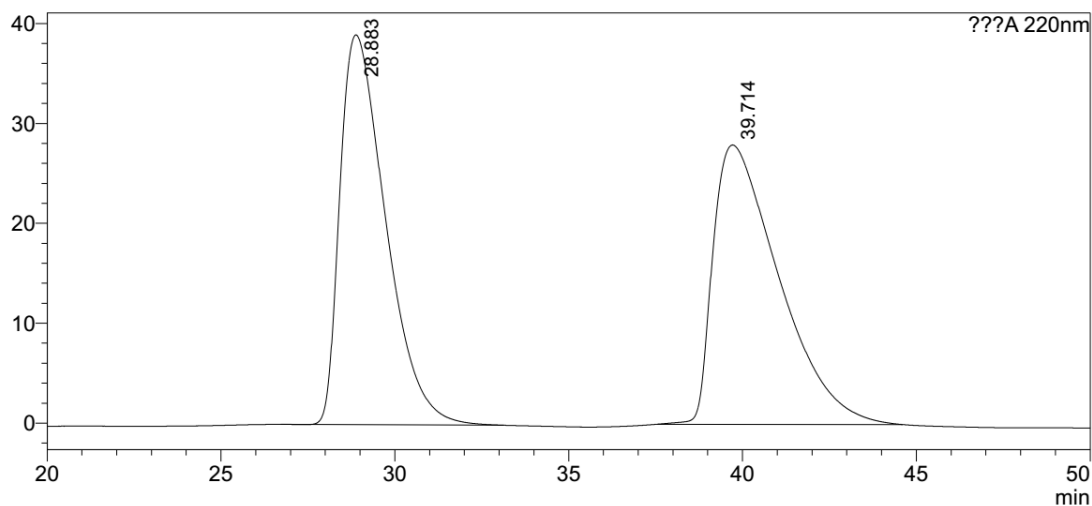

### <Peak Table>

??A 220nm

| Peak# | Ret. Time | Area    | Height | Conc.  | Unit | Mark | Name |
|-------|-----------|---------|--------|--------|------|------|------|
| 1     | 28.883    | 3573822 | 39014  | 49.220 |      | M    |      |
| 2     | 39.714    | 3687094 | 27959  | 50.780 |      | M    |      |
| Total |           | 7260916 | 66974  |        |      |      |      |

### <Chromatogram>

mV

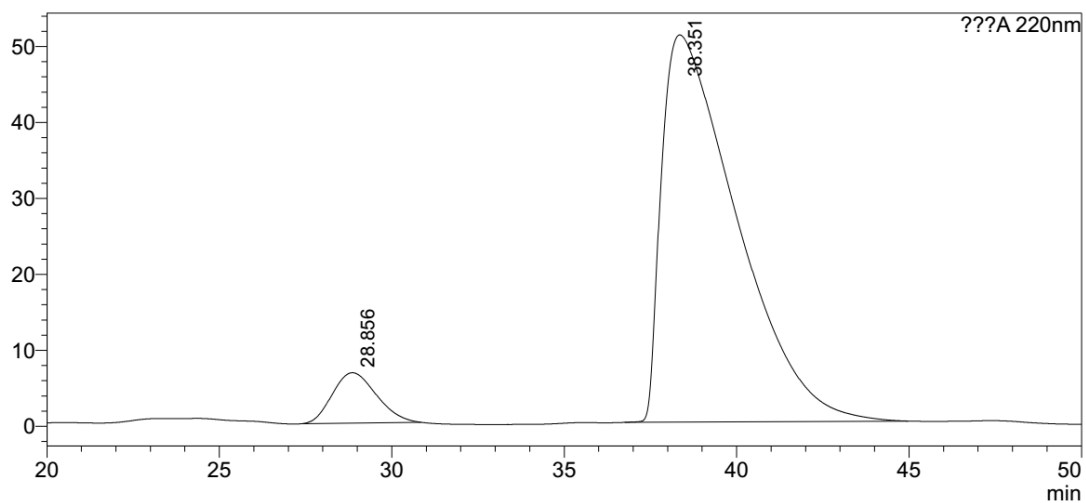

### <Peak Table>

??A 220nm

| Peak# | Ret. Time | Area    | Height | Conc.  | Unit | Mark | Name |
|-------|-----------|---------|--------|--------|------|------|------|
| 1     | 28.856    | 590073  | 6636   | 7.100  |      | M    |      |
| 2     | 38.351    | 7720300 | 50974  | 92.900 |      | M    |      |
| Total |           | 8310373 | 57610  |        |      |      |      |

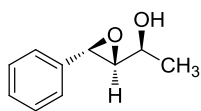

2m

### <Chromatogram>

mV

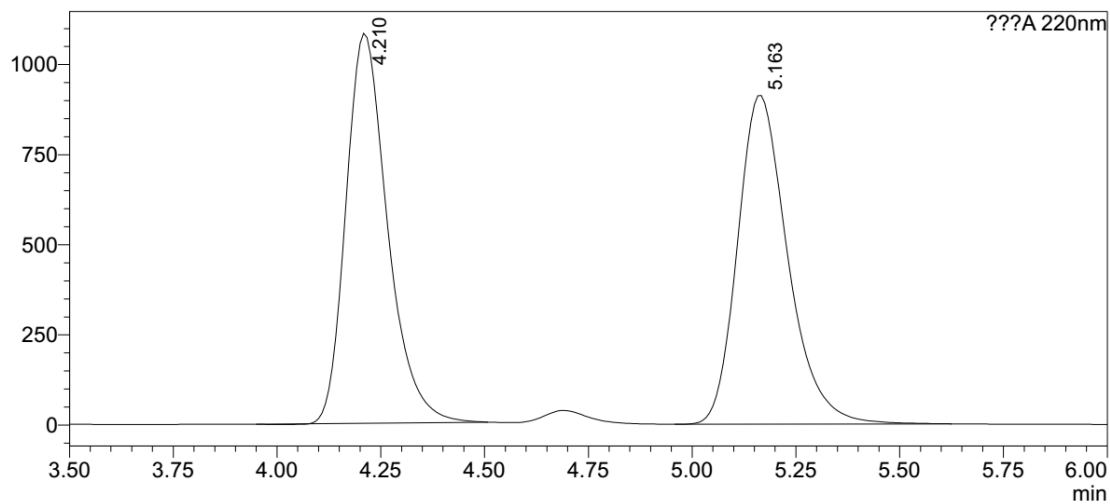

### <Peak Table>

???A 220nm

| Peak# | Ret. Time | Area     | Height  | Conc.  | Unit | Mark | Name |
|-------|-----------|----------|---------|--------|------|------|------|
| 1     | 4.210     | 7538431  | 1081872 | 49.575 |      | M    |      |
| 2     | 5.163     | 7667550  | 912086  | 50.425 |      | M    |      |
| Total |           | 15205981 | 1993958 |        |      |      |      |

### <Chromatogram>

mV

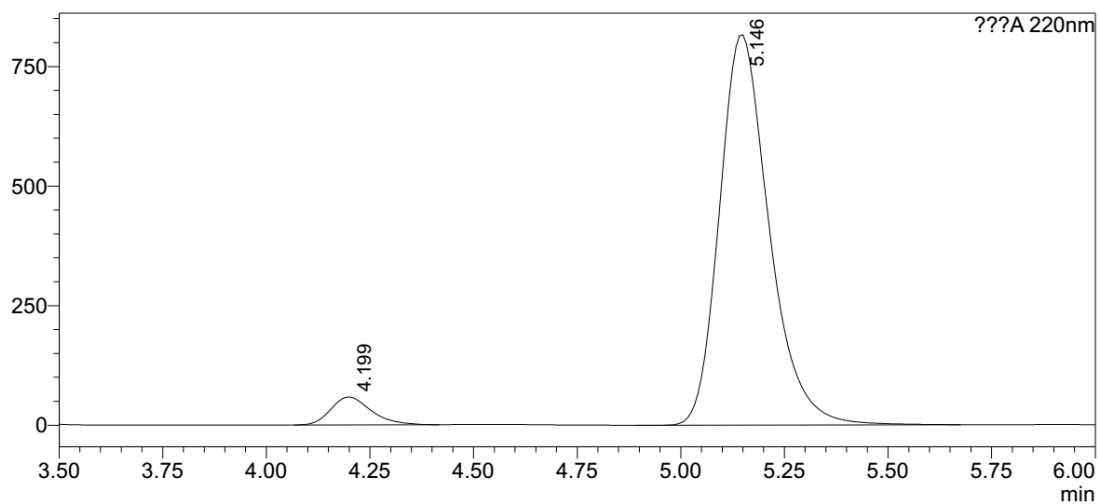

### <Peak Table>

???A 220nm

| Peak# | Ret. Time | Area    | Height | Conc.  | Unit | Mark | Name |
|-------|-----------|---------|--------|--------|------|------|------|
| 1     | 4.199     | 393238  | 58406  | 5.463  |      | M    |      |
| 2     | 5.146     | 6804981 | 815677 | 94.537 |      | M    |      |
| Total |           | 7198219 | 874083 |        |      |      |      |

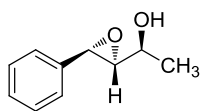

3m

# <Chromatogram>

mV

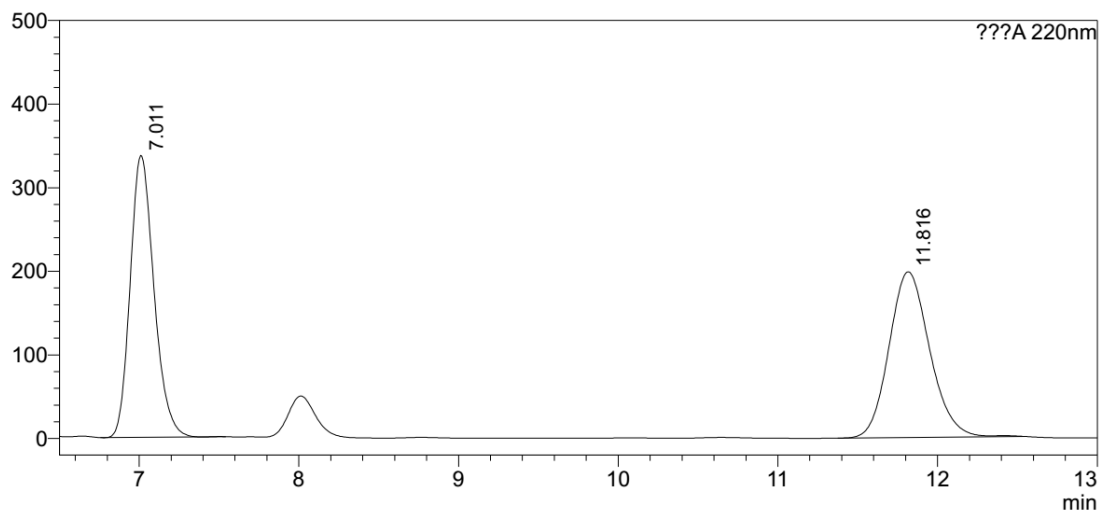

## <Peak Table>

???A 220nm

| Peak# | Ret. Time | Area    | Height | Conc.  | Unit | Mark | Name |
|-------|-----------|---------|--------|--------|------|------|------|
| 1     | 7.011     | 3491036 | 337124 | 49.858 |      | M    |      |
| 2     | 11.816    | 3510986 | 198381 | 50.142 |      | M    |      |
| Total |           | 7002022 | 535504 |        |      |      |      |

# <Chromatogram>

mV

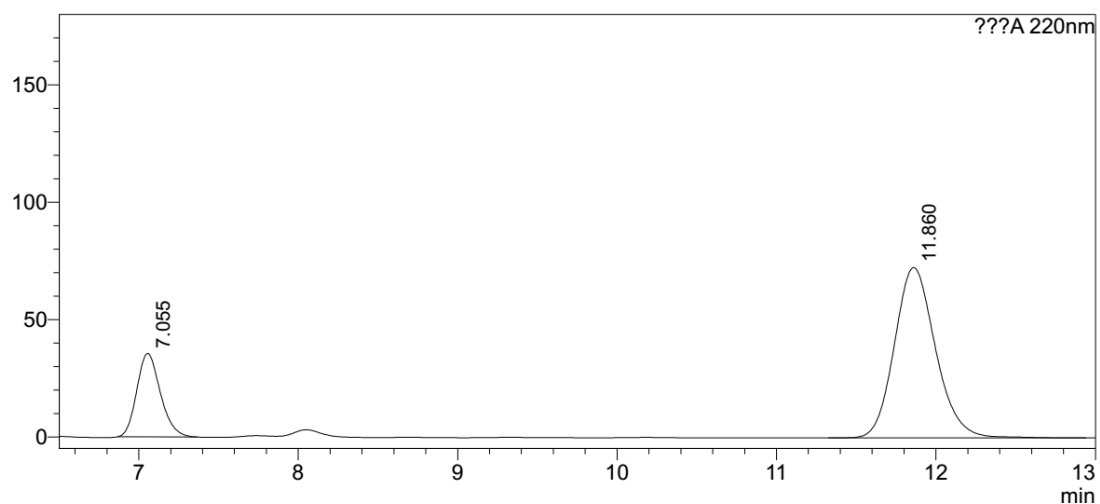

## <Peak Table>

???A 220nm

| Peak# | Ret. Time | Area    | Height | Conc.  | Unit | Mark | Name |
|-------|-----------|---------|--------|--------|------|------|------|
| 1     | 7.055     | 366306  | 35547  | 21.965 |      | M    |      |
| 2     | 11.860    | 1301407 | 72614  | 78.035 |      |      |      |
| Total |           | 1667713 | 108161 |        |      |      |      |

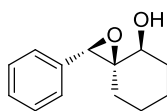

2n

# <Chromatogram>

mV

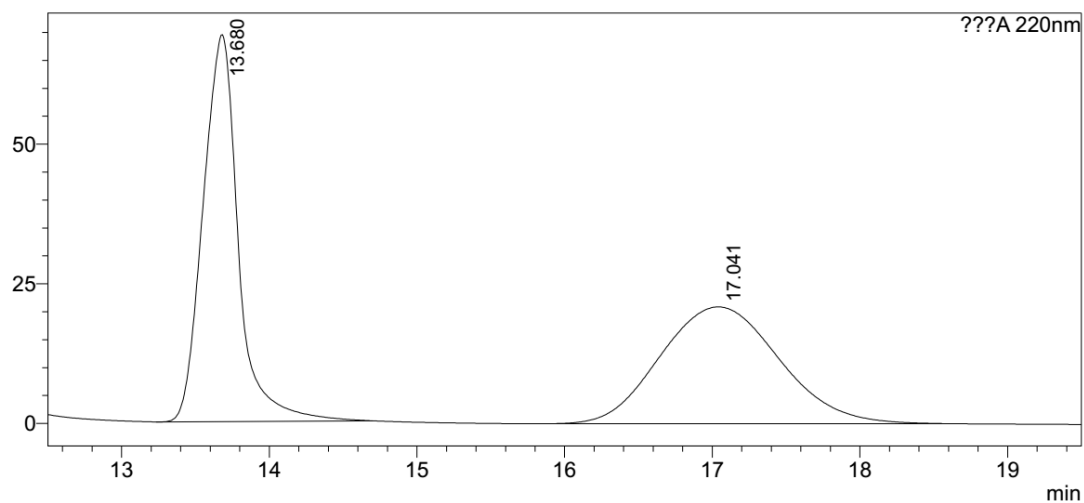

## <Peak Table>

???A 220nm

| Peak# | Ret. Time | Area    | Height | Conc.  | Unit | Mark | Name |
|-------|-----------|---------|--------|--------|------|------|------|
| 1     | 13.680    | 1151598 | 69235  | 49.602 |      | M    |      |
| 2     | 17.041    | 1170093 | 20895  | 50.398 |      | M    |      |
| Total |           | 2321691 | 90129  |        |      |      |      |

# <Chromatogram>

mV

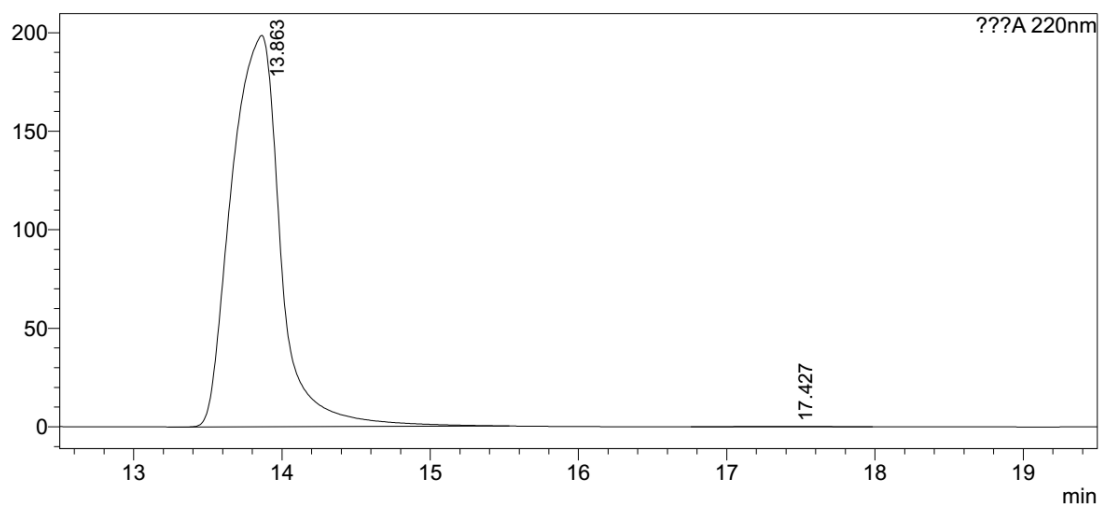

## <Peak Table>

???A 220nm

| Peak# | Ret. Time | Area    | Height | Conc.  | Unit | Mark | Name |
|-------|-----------|---------|--------|--------|------|------|------|
| 1     | 13.863    | 4561836 | 198555 | 99.867 |      | M    |      |
| 2     | 17.427    | 6059    | 143    | 0.133  |      | M    |      |
| Total |           | 4567894 | 198699 |        |      |      |      |

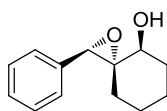

3n

### <Chromatogram>

mV

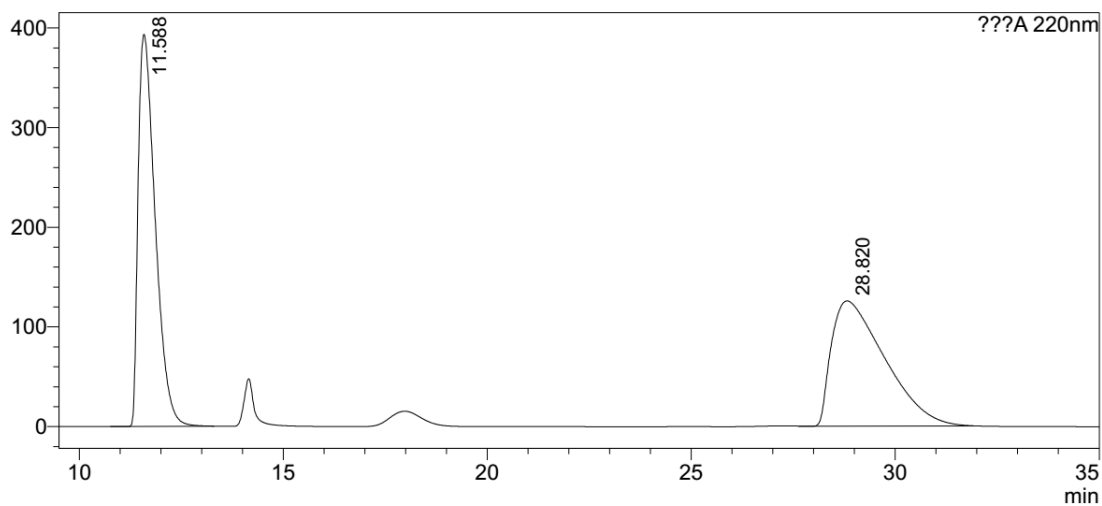

### <Peak Table>

???A 220nm

| Peak# | Ret. Time | Area     | Height | Conc.  | Unit | Mark | Name |
|-------|-----------|----------|--------|--------|------|------|------|
| 1     | 11.588    | 11464522 | 393238 | 50.065 |      | M    |      |
| 2     | 28.820    | 11434849 | 125601 | 49.935 |      | M    |      |
| Total |           | 22899370 | 518839 |        |      |      |      |

### <Chromatogram>

mV

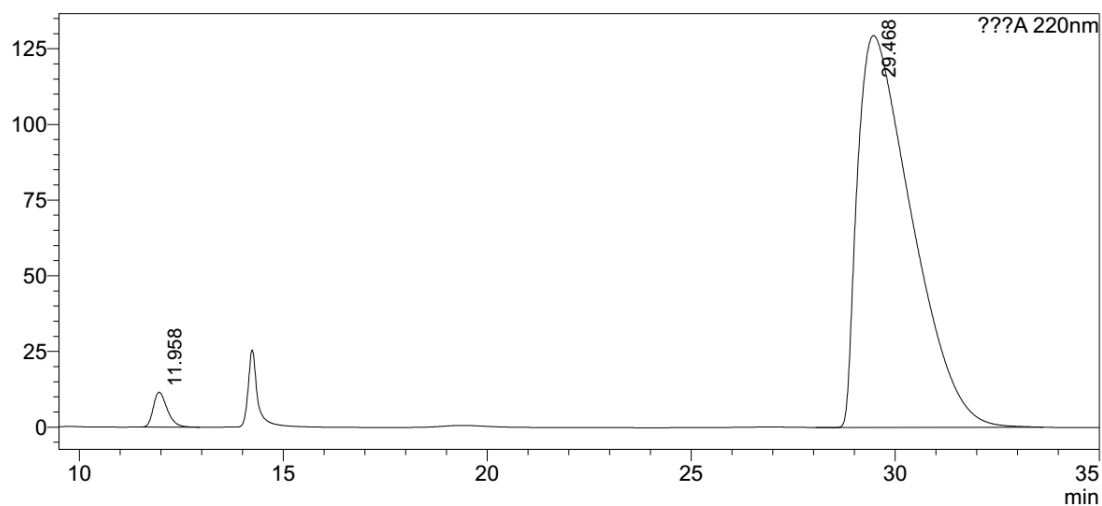

### <Peak Table>

???A 220nm

| Peak# | Ret. Time | Area     | Height | Conc.  | Unit | Mark | Name |
|-------|-----------|----------|--------|--------|------|------|------|
| 1     | 11.958    | 273358   | 11547  | 2.234  |      | M    |      |
| 2     | 29.468    | 11960304 | 129475 | 97.766 |      | M    |      |
| Total |           | 12233663 | 141022 |        |      |      |      |



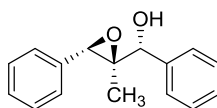

2o

# <Chromatogram>

mV

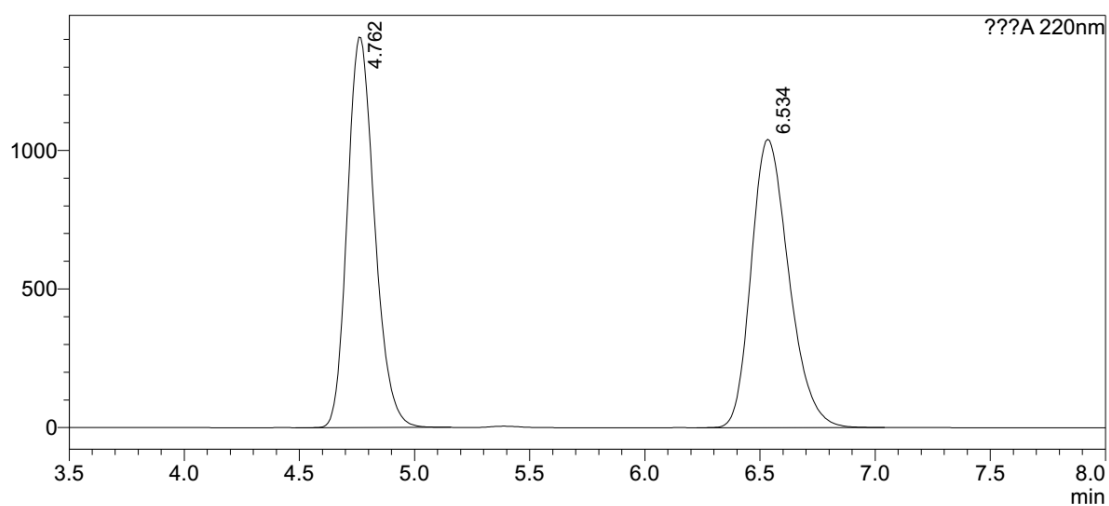

## <Peak Table>

???A 220nm

| Peak# | Ret. Time | Area     | Height  | Conc.  | Unit | Mark | Name |
|-------|-----------|----------|---------|--------|------|------|------|
| 1     | 4.762     | 11584056 | 1408050 | 49.473 |      | M    |      |
| 2     | 6.534     | 11830890 | 1040408 | 50.527 |      | M    |      |
| Total |           | 23414946 | 2448458 |        |      |      |      |

# <Chromatogram>

mV

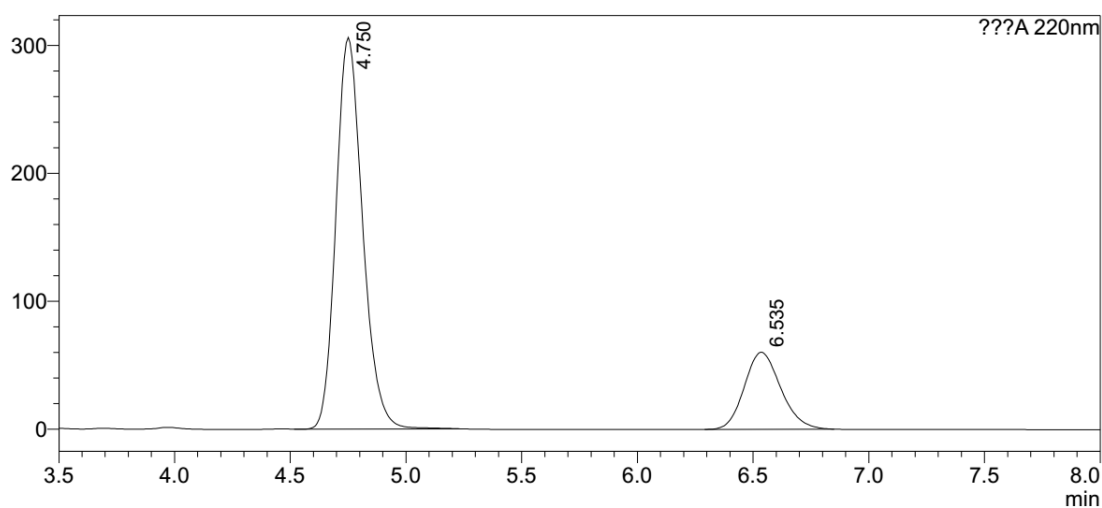

## <Peak Table>

???A 220nm

| Peak# | Ret. Time | Area    | Height | Conc.  | Unit | Mark | Name |
|-------|-----------|---------|--------|--------|------|------|------|
| 1     | 4.750     | 2456863 | 306036 | 78.847 |      | M    |      |
| 2     | 6.535     | 659114  | 60188  | 21.153 |      | M    |      |
| Total |           | 3115977 | 366224 |        |      |      |      |

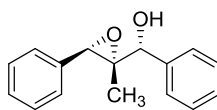

3o

# <Chromatogram>

mV

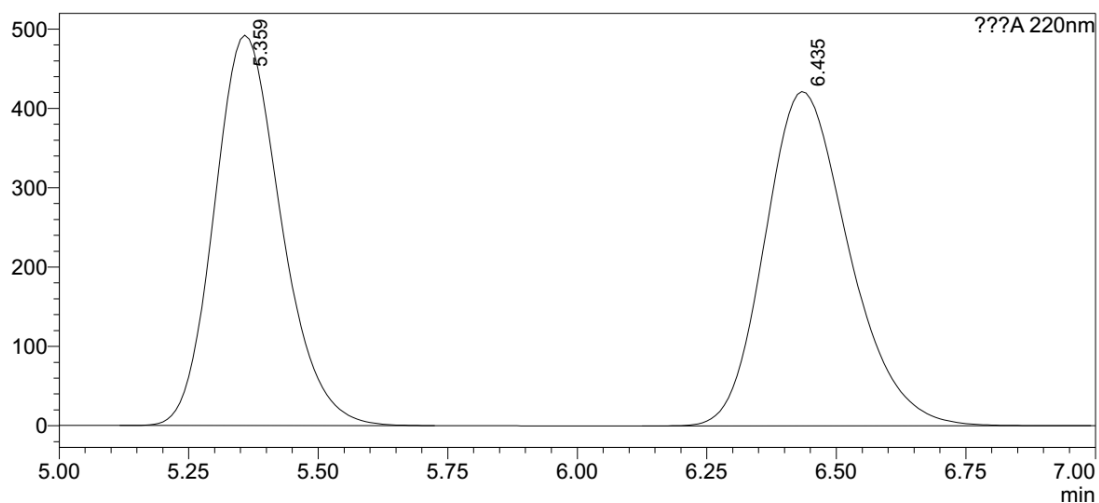

## <Peak Table>

???A 220nm

| Peak# | Ret. Time | Area    | Height | Conc.  | Unit | Mark | Name |
|-------|-----------|---------|--------|--------|------|------|------|
| 1     | 5.359     | 4419728 | 491923 | 48.160 |      | M    |      |
| 2     | 6.435     | 4757391 | 421444 | 51.840 |      | M    |      |
| Total |           | 9177119 | 913367 |        |      |      |      |

# <Chromatogram>

mV

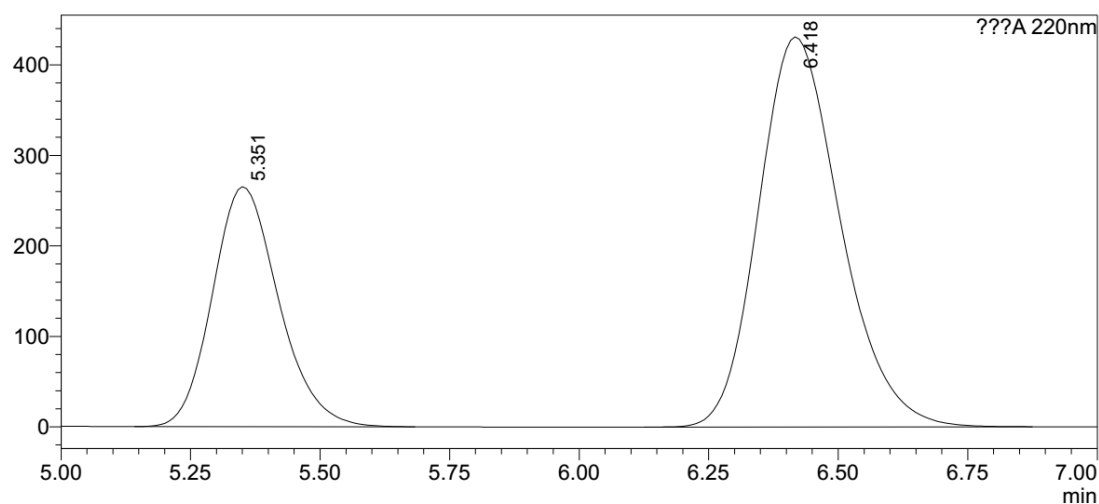

## <Peak Table>

???A 220nm

| Peak# | Ret. Time | Area    | Height | Conc.  | Unit | Mark | Name |
|-------|-----------|---------|--------|--------|------|------|------|
| 1     | 5.351     | 2355898 | 265133 | 33.205 |      | M    |      |
| 2     | 6.418     | 4739036 | 430937 | 66.795 |      | M    |      |
| Total |           | 7094935 | 696070 |        |      |      |      |

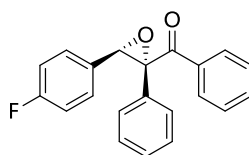

4a

# <Chromatogram>

mV

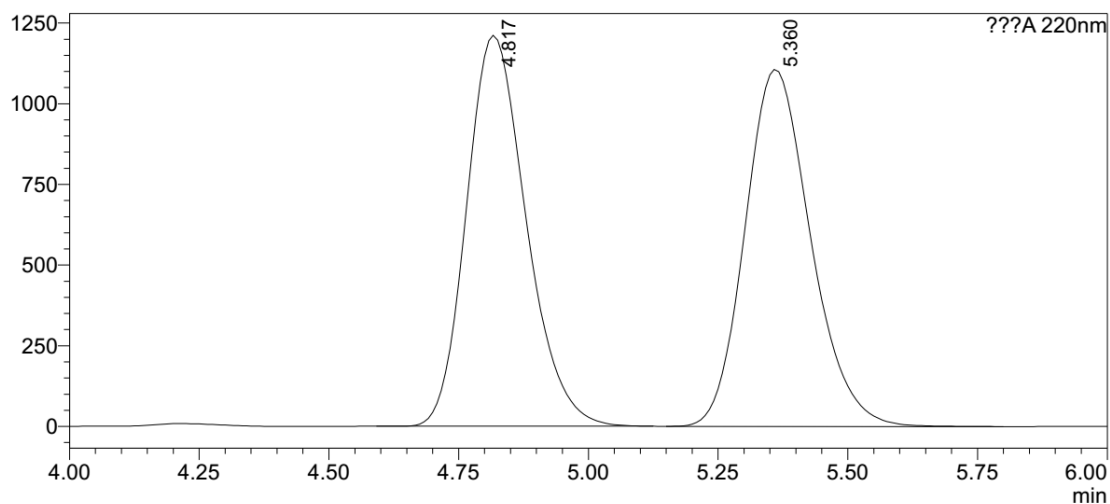

## <Peak Table>

??A 220nm

| Peak# | Ret. Time | Area     | Height  | Conc.  | Unit | Mark | Name |
|-------|-----------|----------|---------|--------|------|------|------|
| 1     | 4.817     | 9673166  | 1210970 | 49.857 |      | M    |      |
| 2     | 5.360     | 9728479  | 1106487 | 50.143 |      | M    |      |
| Total |           | 19401645 | 2317458 |        |      |      |      |

# <Chromatogram>

mV

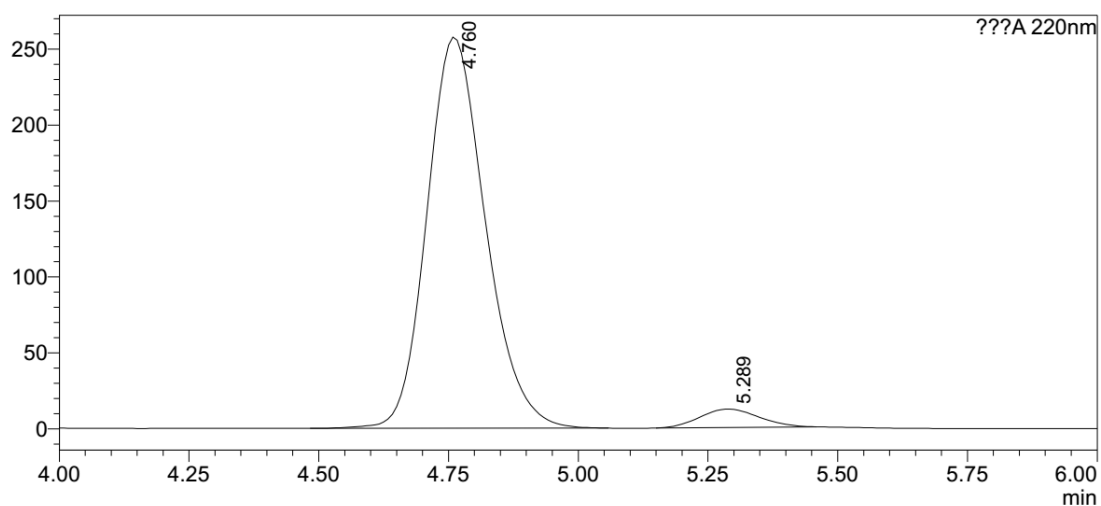

## <Peak Table>

??A 220nm

| Peak# | Ret. Time | Area    | Height | Conc.  | Unit | Mark | Name |
|-------|-----------|---------|--------|--------|------|------|------|
| 1     | 4.760     | 2019342 | 257525 | 95.454 |      | M    |      |
| 2     | 5.289     | 96178   | 12095  | 4.546  |      | M    |      |
| Total |           | 2115520 | 269621 |        |      |      |      |

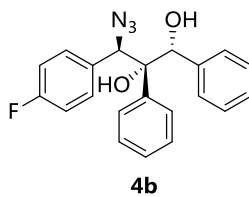

### <Chromatogram>

mV

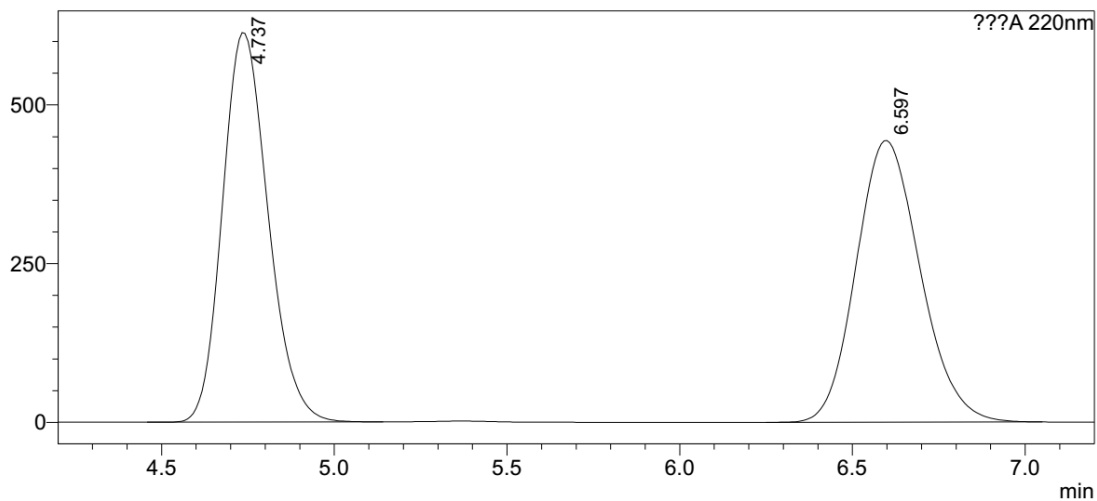

### <Peak Table>

???A 220nm

| Peak# | Ret. Time | Area     | Height  | Conc.  | Unit | Mark | Name |
|-------|-----------|----------|---------|--------|------|------|------|
| 1     | 4.737     | 5641559  | 613379  | 49.617 |      | M    |      |
| 2     | 6.597     | 5728681  | 443735  | 50.383 |      | M    |      |
| Total |           | 11370240 | 1057113 |        |      |      |      |

### <Chromatogram>

mV

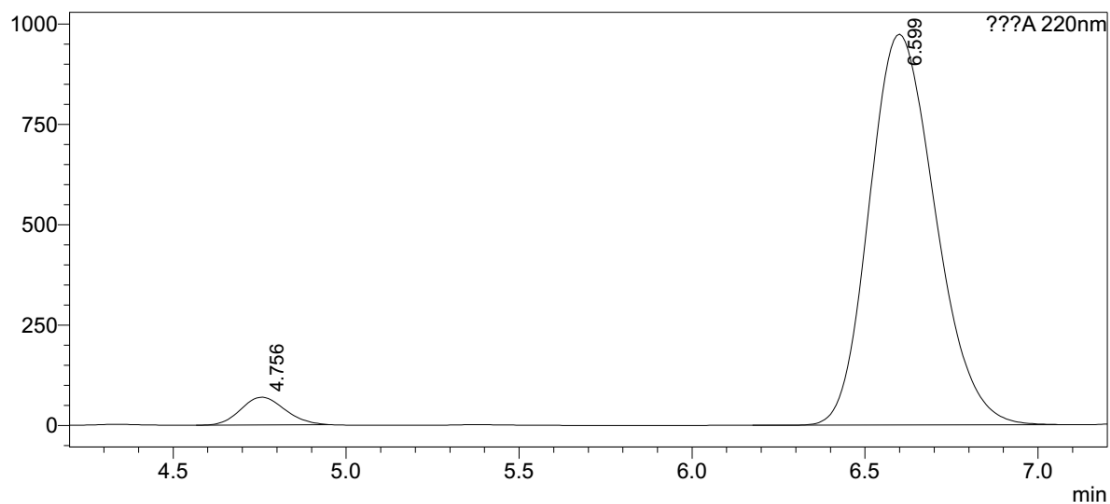

### <Peak Table>

???A 220nm

| Peak# | Ret. Time | Area     | Height  | Conc.  | Unit | Mark | Name |
|-------|-----------|----------|---------|--------|------|------|------|
| 1     | 4.756     | 616656   | 69211   | 4.558  |      | M    |      |
| 2     | 6.599     | 12912716 | 973132  | 95.442 |      | M    |      |
| Total |           | 13529372 | 1042343 |        |      |      |      |

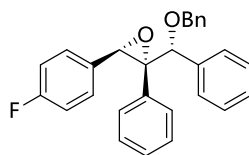

4c

### <Chromatogram>

mV

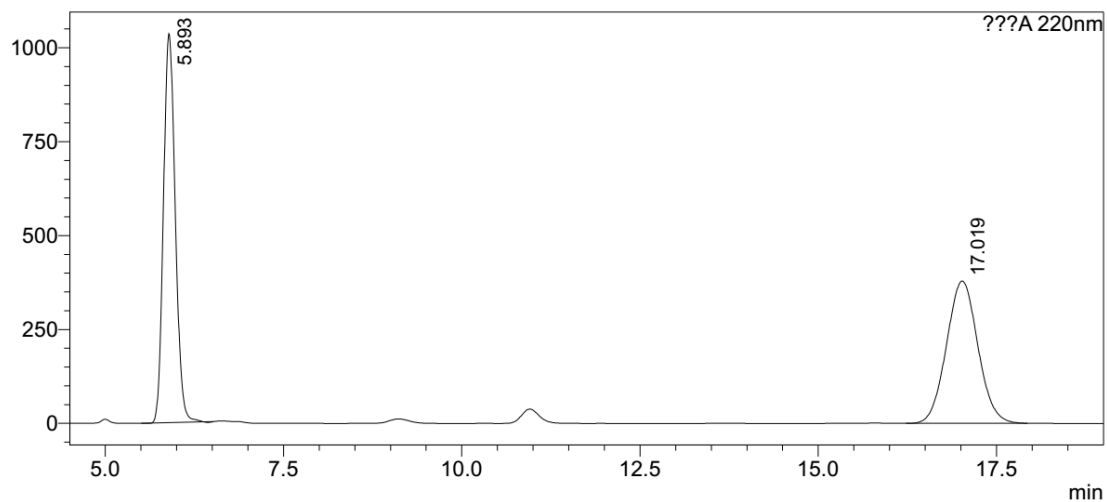

### <Peak Table>

???A 220nm

| Peak# | Ret. Time | Area     | Height  | Conc.  | Unit | Mark | Name |
|-------|-----------|----------|---------|--------|------|------|------|
| 1     | 5.893     | 11954597 | 1035126 | 50.712 |      | M    |      |
| 2     | 17.019    | 11618916 | 379086  | 49.288 |      | M    |      |
| Total |           | 23573513 | 1414212 |        |      |      |      |

### <Chromatogram>

mV

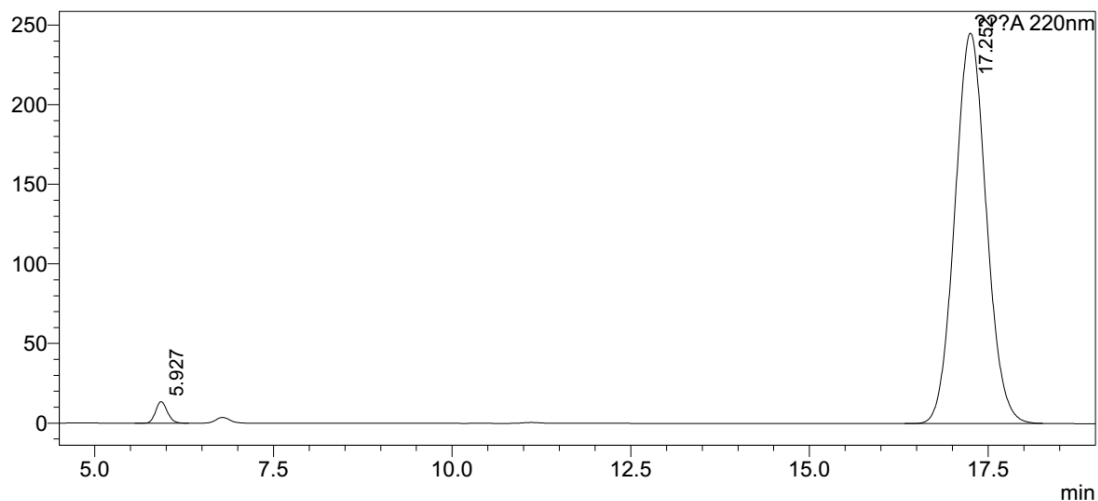

### <Peak Table>

???A 220nm

| Peak# | Ret. Time | Area    | Height | Conc.  | Unit | Mark | Name |
|-------|-----------|---------|--------|--------|------|------|------|
| 1     | 5.927     | 154224  | 13520  | 2.014  |      | M    |      |
| 2     | 17.252    | 7503371 | 245188 | 97.986 |      | M    |      |
| Total |           | 7657594 | 258707 |        |      |      |      |
